# Supplementary material
Source: Royal Society of Chemistry journal article supplement (doi:10.1039/d6ob00259e)
Supplement: d6ob00259e1.pdf [file d6ob00259e1.pdf]

# Supporting Information

## **A tetrazine-driven photocatalytic system suitable for the synthesis of unstable 2,3-dihydroisoxazoles**

Tiantian Chen, Zijian Yuan, Shuo Wang, Jianchun Wang\*

Department of Chemistry, Capital Normal University, Beijing 100048, P. R. China. E-mail:  
cnuwjc@cnu.edu.cn

## Contents

|                                                                                      |    |
|--------------------------------------------------------------------------------------|----|
| <b>Experimental Section</b> .....                                                    | 6  |
| <b>1. Optimization of reaction conditions</b> .....                                  | 6  |
| <b>2. Control experiments</b> .....                                                  | 11 |
| <b>3. Synthesis of nitrones</b> .....                                                | 16 |
| <b>4. Alkynyl ester</b> .....                                                        | 20 |
| <b>5. Synthesis of 2,3-dihydroisoxazoles</b> .....                                   | 20 |
| <b>6. <sup>1</sup>H NMR, <sup>13</sup>C NMR, HRMS Spectra of New Compounds</b> ..... | 27 |

## Index of Figures

|                                                                                                                                                                                                                                    |    |
|------------------------------------------------------------------------------------------------------------------------------------------------------------------------------------------------------------------------------------|----|
| Figure S1 UV-Vis absorption spectrum of 3,6-(2-pyridyl)-1,2,4,5-tetrazine [ <b>pytz</b> , $7.5 \times 10^{-3}$ M] in dichloromethane.....                                                                                          | 11 |
| Figure S2 LC-MS of reaction mixture of <b>1a</b> with <b>1b</b> catalyzed by <b>pytz</b> .....                                                                                                                                     | 12 |
| Figure S3 LC-MS of the reaction mixture with TEMPO added under standard reaction conditions.....                                                                                                                                   | 13 |
| Figure S4 Cyclic voltammetry of ferrocene in dichloromethane: voltage range from 0 to 1 V; scan rate of 50 mV/s .....                                                                                                              | 13 |
| Figure S5 Cyclic voltammetry of the pure solvent DCM was conducted over a voltage range of 1.0 to -1.5 V at a scan rate of 50 mV/s .....                                                                                           | 14 |
| Figure S6 Cyclic voltammetry of <b>pytz</b> in dichloromethane: (A) voltage range from -0.30 to -1.25 V; (B) voltage range from 1.5 to -1.5 V; scan rate: 50 mV/s.....                                                             | 14 |
| Figure S7 Cyclic voltammetry of nitron <b>1a</b> was conducted in dichloromethane (DCM) over a potential range of -0.30 to -1.25 V versus the reference electrode, with a scan rate of 50 mV/s.....                                | 15 |
| Figure S8 Cyclic voltammetry of ethyl propiolate ( <b>1b</b> ) in dichloromethane: (C) voltage range from -0.30 to -1.25 V; (D) voltage range from 1.5 to -1.5 V, with a scan rate of 50 mV/s .....                                | 15 |
| Figure S9 Cyclic voltammetry of ethyl propargyl and <b>pytz</b> in dichloromethane at a molar ratio of 2:1 was performed over two voltage ranges: (E) -0.30 to -1.25 V and (F) -1.50 to +1.50 V, with a scan rate of 50 mV/s ..... | 16 |
| Figure S10 Cyclic voltammetry of nitron <b>1a</b> and <b>pytz</b> in dichloromethane at a molar ratio of 2:1 was performed over two voltage ranges: (G) -0.30 to -1.25 V and (H) 1.5 to -1.5 V, with a scan rate of 50 mV/s.....   | 16 |
| Figure S11 $^1\text{H}$ NMR of <b>1a</b> .....                                                                                                                                                                                     | 27 |
| Figure S12 $^1\text{H}$ NMR of <b>2a</b> .....                                                                                                                                                                                     | 27 |
| Figure S13 $^1\text{H}$ NMR of <b>3a</b> .....                                                                                                                                                                                     | 28 |
| Figure S14 $^{13}\text{C}$ NMR of <b>3a</b> .....                                                                                                                                                                                  | 28 |
| Figure S15 HRMS of <b>3a</b> .....                                                                                                                                                                                                 | 29 |
| Figure S16 $^1\text{H}$ NMR of <b>4a</b> .....                                                                                                                                                                                     | 29 |
| Figure S17 $^1\text{H}$ NMR of <b>5a</b> .....                                                                                                                                                                                     | 30 |
| Figure S18 $^1\text{H}$ NMR of <b>6a</b> .....                                                                                                                                                                                     | 30 |
| Figure S19 $^1\text{H}$ NMR of <b>7a</b> .....                                                                                                                                                                                     | 31 |
| Figure S20 $^1\text{H}$ NMR of <b>8a</b> .....                                                                                                                                                                                     | 31 |
| Figure S21 $^{13}\text{C}$ NMR of <b>8a</b> .....                                                                                                                                                                                  | 32 |
| Figure S22 HRMS of <b>8a</b> .....                                                                                                                                                                                                 | 32 |
| Figure S23 $^1\text{H}$ NMR of <b>9a</b> .....                                                                                                                                                                                     | 33 |
| Figure S24 $^{13}\text{C}$ NMR of <b>9a</b> .....                                                                                                                                                                                  | 33 |
| Figure S25 HRMS of <b>9a</b> .....                                                                                                                                                                                                 | 34 |
| Figure S26 $^1\text{H}$ NMR of <b>10a</b> .....                                                                                                                                                                                    | 34 |
| Figure S27 $^{13}\text{C}$ NMR of <b>10a</b> .....                                                                                                                                                                                 | 35 |
| Figure S28 HRMS of <b>10a</b> .....                                                                                                                                                                                                | 35 |
| Figure S29 $^1\text{H}$ NMR of <b>11a</b> .....                                                                                                                                                                                    | 36 |

|                                                                  |    |
|------------------------------------------------------------------|----|
| Figure S30 <sup>1</sup> H NMR of <b>12a</b> .....                | 36 |
| Figure S31 <sup>13</sup> C NMR of <b>12a</b> .....               | 37 |
| Figure S32 HRMS of <b>12a</b> .....                              | 37 |
| Figure S33 <sup>1</sup> H NMR of <b>13a</b> .....                | 38 |
| Figure S34 <sup>1</sup> H NMR of <b>14a</b> .....                | 38 |
| Figure S35 <sup>13</sup> C NMR of <b>14a</b> .....               | 39 |
| Figure S36 HRMS of <b>14a</b> .....                              | 39 |
| Figure S37 <sup>1</sup> H NMR of <b>15a</b> .....                | 40 |
| Figure S38 <sup>13</sup> C NMR of <b>15a</b> .....               | 40 |
| Figure S39 HRMS of <b>15a</b> .....                              | 41 |
| Figure S40 <sup>1</sup> H NMR of <b>1c</b> and <b>1c'</b> .....  | 41 |
| Figure S41 <sup>13</sup> C NMR of <b>1c</b> and <b>1c'</b> ..... | 42 |
| Figure S42 HRMS of <b>1c</b> and <b>1c'</b> .....                | 42 |
| Figure S43 <sup>1</sup> H NMR of <b>2c</b> and <b>2c'</b> .....  | 43 |
| Figure S44 <sup>13</sup> C NMR of <b>2c</b> and <b>2c'</b> ..... | 43 |
| Figure S45 HRMS of <b>2c</b> and <b>2c'</b> .....                | 44 |
| Figure S46 <sup>1</sup> H NMR of <b>3c</b> and <b>3c'</b> .....  | 44 |
| Figure S47 <sup>13</sup> C NMR of <b>3c</b> and <b>3c'</b> ..... | 45 |
| Figure S48 HRMS of <b>3c</b> and <b>3c'</b> .....                | 45 |
| Figure S49 <sup>1</sup> H NMR of <b>4c</b> and <b>4c'</b> .....  | 46 |
| Figure S50 <sup>13</sup> C NMR of <b>4c</b> and <b>4c'</b> ..... | 46 |
| Figure S51 HRMS of <b>4c</b> and <b>4c'</b> .....                | 47 |
| Figure S52 <sup>1</sup> H NMR of <b>5c</b> and <b>5c'</b> .....  | 47 |
| Figure S53 <sup>13</sup> C NMR of <b>5c</b> and <b>5c'</b> ..... | 48 |
| Figure S54 HRMS of <b>5c</b> and <b>5c'</b> .....                | 48 |
| Figure S55 <sup>1</sup> H NMR of <b>6c</b> and <b>6c'</b> .....  | 49 |
| Figure S56 <sup>13</sup> C NMR of <b>6c</b> and <b>6c'</b> ..... | 49 |
| Figure S57 HRMS of <b>6c</b> and <b>6c'</b> .....                | 50 |
| Figure S58 <sup>1</sup> H NMR of <b>7c</b> .....                 | 50 |
| Figure S59 <sup>1</sup> H NMR of <b>7c'</b> .....                | 51 |
| Figure S60 <sup>1</sup> H NMR of <b>7c</b> and <b>7c'</b> .....  | 51 |
| Figure S61 <sup>13</sup> C NMR of <b>7c</b> and <b>7c'</b> ..... | 52 |
| Figure S62 HRMS of <b>7c</b> and <b>7c'</b> .....                | 52 |
| Figure S63 <sup>1</sup> H NMR of <b>8c</b> and <b>8c'</b> .....  | 53 |
| Figure S64 <sup>13</sup> C NMR of <b>8c</b> and <b>8c'</b> ..... | 53 |
| Figure S65 HRMS of <b>8c</b> and <b>8c'</b> .....                | 54 |
| Figure S66 <sup>1</sup> H NMR of <b>9c</b> .....                 | 54 |
| Figure S67 <sup>13</sup> C NMR of <b>9c</b> .....                | 55 |
| Figure S68 HRMS of <b>9c</b> .....                               | 55 |
| Figure S69 <sup>1</sup> H NMR of <b>10c</b> .....                | 56 |
| Figure S70 <sup>13</sup> C NMR of <b>10c</b> .....               | 56 |
| Figure S71 HRMS of <b>10c</b> .....                              | 57 |
| Figure S72 <sup>1</sup> H NMR of <b>11c</b> .....                | 57 |
| Figure S 73 <sup>13</sup> C NMR of <b>11c</b> .....              | 58 |

|                                                    |    |
|----------------------------------------------------|----|
| Figure S74 HRMS of <b>11c</b> .....                | 58 |
| Figure S75 <sup>1</sup> H NMR of <b>12c</b> .....  | 59 |
| Figure S76 <sup>13</sup> C NMR of <b>12c</b> ..... | 59 |
| Figure S77 HRMS of <b>12c</b> .....                | 60 |
| Figure S78 <sup>1</sup> H NMR of <b>13c</b> .....  | 60 |
| Figure S79 <sup>13</sup> C NMR of <b>13c</b> ..... | 61 |
| Figure S80 HRMS of <b>13c</b> .....                | 61 |
| Figure S81 <sup>1</sup> H NMR of <b>14c</b> .....  | 62 |
| Figure S82 <sup>13</sup> C NMR of <b>14c</b> ..... | 62 |
| Figure S83 HRMS of <b>14c</b> .....                | 63 |
| Figure S84 <sup>1</sup> H NMR of <b>15c</b> .....  | 63 |
| Figure S85 <sup>13</sup> C NMR of <b>15c</b> ..... | 64 |
| Figure S86 HRMS of <b>15c</b> .....                | 64 |
| Figure S87 <sup>1</sup> H NMR of <b>16c</b> .....  | 65 |
| Figure S88 <sup>13</sup> C NMR of <b>16c</b> ..... | 65 |
| Figure S89 HRMS of <b>16c</b> .....                | 66 |
| Figure S90 <sup>1</sup> H NMR of <b>17c</b> .....  | 66 |
| Figure S91 <sup>13</sup> C NMR of <b>17c</b> ..... | 67 |
| Figure S92 HRMS of <b>17c</b> .....                | 67 |
| Figure S93 <sup>1</sup> H NMR of <b>18c</b> .....  | 68 |
| Figure S94 <sup>13</sup> C NMR of <b>18c</b> ..... | 68 |
| Figure S95 HRMS of <b>18c</b> .....                | 69 |
| Figure S96 HRMS of <b>1f</b> .....                 | 69 |

## Experimental Section

Most materials and reagents were purchased from commercial suppliers and used without further purification.  $^1\text{H}$  and  $^{13}\text{C}$  NMR spectra were mainly recorded on 600 MHz Varian VNMRS Spectrometer using  $\text{D}_2\text{O}$ ,  $\text{DMSO-}d_6$ , or  $\text{CDCl}_3$  as solvent at  $25^\circ\text{C}$ . High-resolution mass spectroscopy (HRMS) was performed on a Bruker APEXIIFT-ICR mass spectrometer. Melting points were measured on a WRS-1B micro-melting point apparatus (YiCe, Shanghai).

### 1. Optimization of reaction conditions

#### 1.1 Screening of catalysis

Several studies have reported the use of metal complexes as catalysts for 1,3-dipolar cycloaddition reactions; [1,2,3] however, to date, no catalytic application of tetrazine in this transformation has been documented. In our study, the reaction between substrates **1a** and **1b** was conducted with a molar ratio of **1a:1b** = 1:10, employing 0.1 equivalents of catalyst. The reaction was performed at  $40^\circ\text{C}$  for 3 hours in dichloromethane as the solvent. The results are summarized in Table S1. In the absence of any catalyst, the yield was low, amounting to only 24% (Entry 1). As shown in the table, the incorporation of tetrazine derivatives significantly enhances the reaction yield. Notably, 3,6-di(pyridin-2-yl)-1,2,4,5-tetrazine (**pytz**) proved particularly effective, increasing the yield to 88% while suppressing by-product formation (Entry 4). Based on these results, **pytz** was selected as the catalyst of choice for subsequent investigations.

Table S1 Range of Catalysis

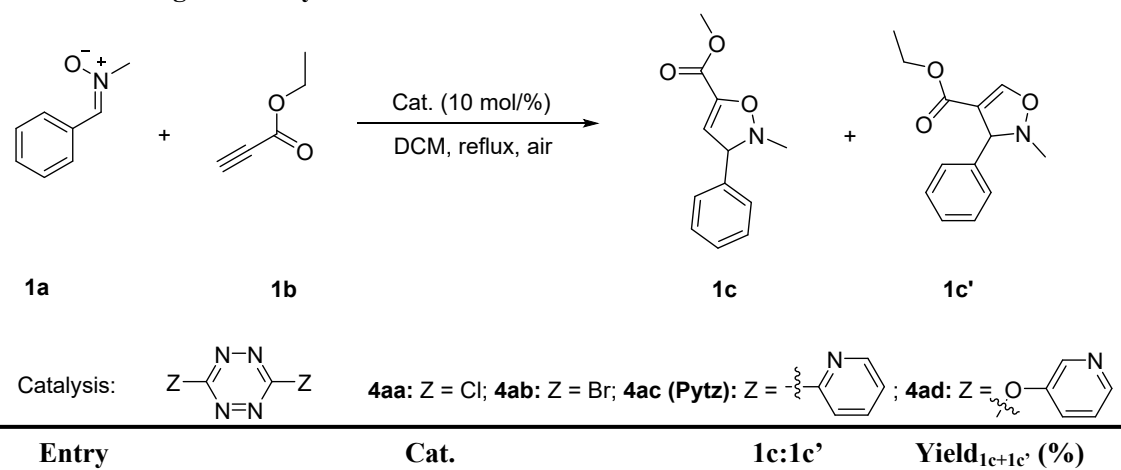

[1] G. Desimoni, G. Faita, A. Mortoni and P. Righetti, 1,3-Dipolar cycloadditions catalyzed by bis(oxazoline)-magnesium-based chiral complexes. The importance of a Mg(II) counterion, *Tetrahedron Lett.*, 1999, **40**, 2001-2004.

[2] M. Kawamura and S. Kobayashi, A switch of enantiofacial selectivity in chiral ytterbium-catalyzed 1,3-dipolar cycloaddition reactions, *Tetrahedron Lett.*, 1999, **40**, 3213-3216.

[3] S. Kanemasa, N. Ueno and M. Shirahase, Nitrene cycloaddition reactions to  $\alpha,\beta$ -unsaturated carbonyl acceptors catalyzed by a pinhole Lewis acid catalyst. Dramatic rate acceleration and improvement of regioselectivity and diastereoselectivity, *Tetrahedron Lett.*, 2002, **43**, 657-660.

|   |                                                                                   |     |    |
|---|-----------------------------------------------------------------------------------|-----|----|
| 1 | None                                                                              | 1:2 | 24 |
| 2 | 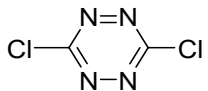 | 1:2 | 38 |
| 3 |  | 5:9 | 57 |
| 4 |  | 4:9 | 88 |
| 5 |  | 5:9 | 73 |
| 6 |  | 6:7 | 75 |

## 1.2 Selection of catalyst dosage

**Pytz** was employed as the catalyst, with a substrate molar ratio of **1a** to **1b** of 1:10, using dichloromethane as the solvent. The reaction was conducted at 40 °C for 3 hours. The influence of varying catalyst loading on the reaction yield was systematically investigated, and the results are summarized in Table S2. As the catalyst loading increased, the formation of by-product decreased significantly; however, the overall yield also declined markedly. Based on this trade-off, a catalyst loading of 10 mol% was determined to be optimal for **pytz**.

**Table S2 Selection of catalyst dosage**

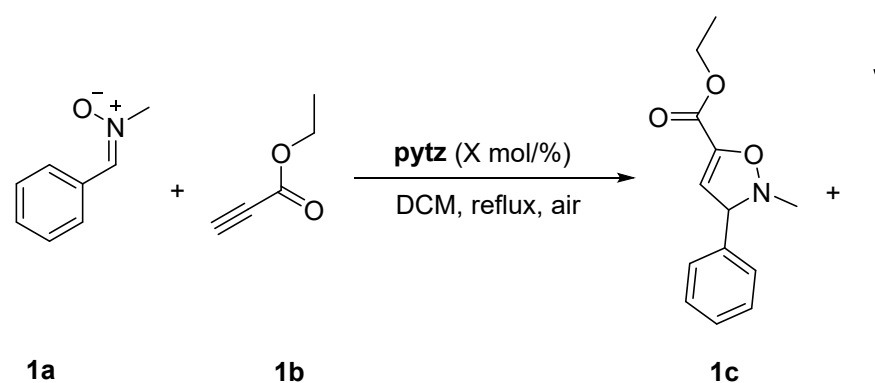

| Entry | Cat.(mol%) | 1c:1c' | Yield <sub>1c+1c'</sub> (%) |
|-------|------------|--------|-----------------------------|
| 1     | 5          | 1:2    | 59                          |
| 2     | 10         | 1:2    | 88                          |
| 3     | 15         | 1:2    | 55                          |

### 1.3 Screening of feed ratio

To further enhance the reaction yield, a systematic investigation of the feeding ratios of substrates **1a** and **1b** was conducted. The reactions were carried out using **pytz** (10 mol%) as the catalyst, with varying molar ratios of **1a** and **1b** under an air atmosphere at 40 °C with reflux for 3 hours. The results are summarized in Table S3. As indicated in the table, increasing the molar proportion of **1b** relative to **1a** leads to a marked improvement in reaction yield. The maximum yield of 88% was achieved when the molar ratio of **1a** to **1b** was set at 1:10. A slight decrease in yield was observed when the ratio was increased to 1:15. Based on these findings, a 1:10 molar ratio of **1a** to **1b** was determined to be optimal for this transformation.

**Table S3 Screening of feed ratio**

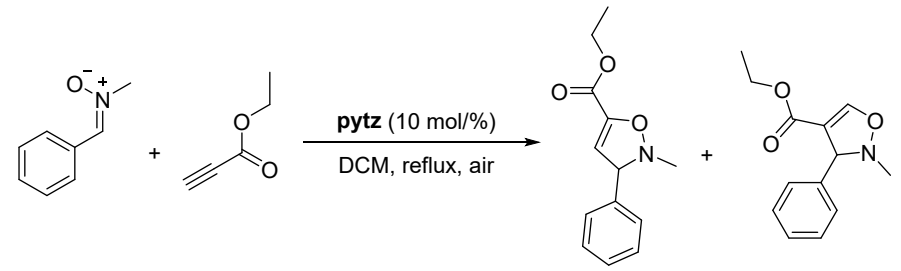

**1a** + **1b**  $\xrightarrow[\text{DCM, reflux, air}]{\text{pytz (10 mol\%)}}$  **1c** + **1c'**

| Entry | Ratio(1a:1b) | 1c:1c' | Yield <sub>1c+1c'</sub> (%) |
|-------|--------------|--------|-----------------------------|
| 1     | 1:1          | 1:2    | 56                          |
| 2     | 1:3          | 2:5    | 68                          |
| 3     | 1:5          | 1:2    | 77                          |
| 4     | 1:10         | 4:9    | 88                          |
| 5     | 1:15         | 1:2    | 87                          |

### 1.4 Selection of solvents

In organic reactions, the choice of an appropriate solvent is often critical to the success or failure of the transformation. Accordingly, several commonly used laboratory solvents were selected for evaluation. The reactions were conducted using **pytz** (10 mol%) as the catalyst, with a 1:10 molar ratio of substrates **1a** to **1b**, under ambient atmospheric conditions at a controlled temperature of 40 °C for 3 hours. The results are summarized in Table S4. Protic solvents such as methanol and HFIP yielded no detectable amounts of the desired product or by-products, indicating a pronounced inhibitory effect of protic solvents on this reaction. This observation is consistent with previously reported literature. Among the aprotic solvents tested, toluene and acetonitrile afforded no by-products; however, the highest product yield was achieved when dichloromethane was employed as the solvent. Based on a comprehensive assessment of these results, dichloromethane was identified as the optimal solvent for this transformation.

**Table S4 Selection of solvents**

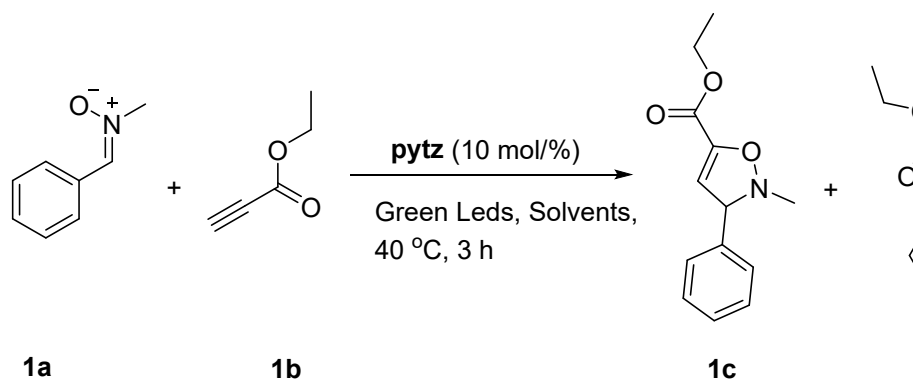

| Entry | Solvent            | 1c:1c' | Yield <sub>1c+1c'</sub> (%) |
|-------|--------------------|--------|-----------------------------|
| 1     | Toluene            | 1:2    | 80                          |
| 2     | CH <sub>3</sub> CN | 7:9    | 45                          |
| 3     | DMF                | 6:7    | 67                          |
| 4     | THF                | 4:9    | 50                          |
| 5     | CHCl <sub>3</sub>  | 3:7    | 57                          |
| 6     | DCM                | 1:2    | 88                          |
| 7     | MeOH               | 0      | 0                           |
| 8     | HFIP               | 0      | 0                           |

### 1.5 Selection of temperature

Given that dichloromethane was selected as the solvent and most photocatalytic reactions are conducted under ambient temperature conditions, a temperature range of 5 to 40 °C was chosen for evaluation. The catalyst employed was **pytz** (10 mol%), with a molar ratio of substrates **1a** to **1b** set at 1:10. The reaction was carried out in dichloromethane under an air atmosphere for 3 hours, and the results are summarized in Table S5. The data indicate that lower temperatures are unfavorable for the reaction. As the temperature increases, the yield improves significantly; however, the formation of by-product also gradually increases. Subsequent experiments demonstrated that extending the reaction time to 6 hours at 25 °C afforded a yield of 84%. Taking into account the trade-off between reaction time and yield, 40 °C was determined to be the optimal reaction temperature.

**Table S5 Selection of temperature**

$\text{1a} + \text{1b} \xrightarrow[\text{DCM, Temp., air}]{\text{pytz (10 mol\%)}}$

$\text{1c} + \text{1c'}$

| Entry | Temp.(°C) | 1c:1c' | Yield <sub>1c+1c'</sub> (%) |
|-------|-----------|--------|-----------------------------|
| 1     | 40        | 1:2    | 88                          |

|   |    |     |                       |
|---|----|-----|-----------------------|
| 2 | 25 | 1:2 | 80 (84 <sup>a</sup> ) |
| 3 | 5  | 2:3 | 32                    |

<sup>a</sup>The reaction time was extended to 6 h at 25 °C.

### 1.6 Selection of oxidant

Chemical reactions mediated by tetrazines necessitate the presence of an oxidant. In this study, **pytz** was employed as the catalyst, with a reactant molar ratio of 1:10 and dichloromethane serving as the solvent. The reaction was conducted at 40 °C for 3 hours under various oxidative conditions. As summarized in Table S6, the influence of different oxidants on reaction efficiency was systematically evaluated. Under a nitrogen atmosphere, the reaction yield was found to be minimal. In contrast, the use of either pure oxygen or ambient air significantly enhanced the yield. Notably, no substantial improvement was observed when oxygen was used instead of air. Therefore, air was considered the most effective and practical oxidant for this transformation.

**Table S6 Selection of oxidant**

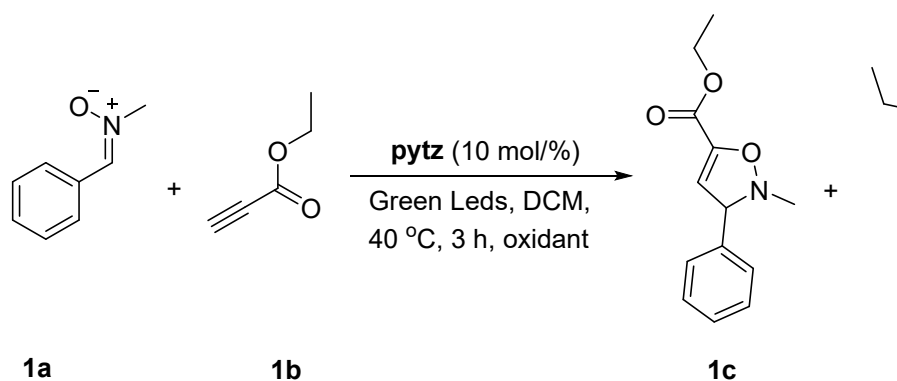

| Entry | Solvent        | 1c:1c' | Yield <sub>1c+1c'</sub> (%) |
|-------|----------------|--------|-----------------------------|
| 1     | O <sub>2</sub> | 5:9    | 91                          |
| 2     | air            | 1:2    | 88                          |
| 3     | N <sub>2</sub> | 3:5    | 21                          |

### 1.7 Selection of light source

Ultraviolet-visible spectrophotometric analysis revealed that a dichloromethane solution of **pytz** ( $7.5 \times 10^{-3}$  M) exhibits a distinct maximum absorption peak in the visible region at approximately 545 nm. Based on this finding, the light source screening was conducted under three conditions: dark environment, ambient light, and green light illumination. As shown in Table S7 and Figure S1, the reaction yield decreased significantly under complete darkness, reaching only 37.9%. In contrast, the yield improved markedly under ambient light and reached 97.3% when green light was applied. These results indicate that green light is the optimal illumination source, with an effective illumination distance recommended between 2 and 5 cm.

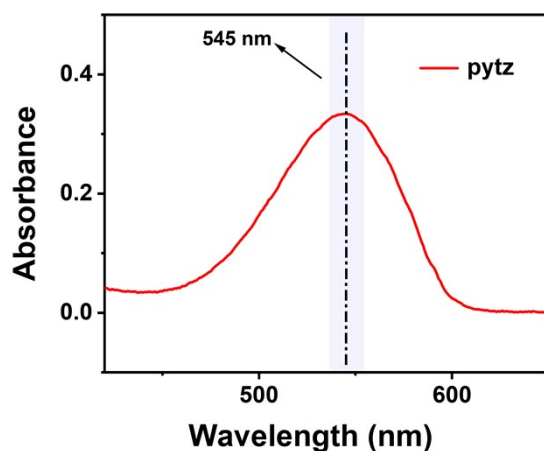

Figure S1 UV-Vis absorption spectrum of 3,6-(2-pyridyl)-1,2,4,5-tetrazine [**pytz**,  $7.5 \times 10^{-3}$  M] in dichloromethane

**Table S7 Selection of light source**

| Entry | Light          | 1c:1c' | Yield <sub>1c+1c'</sub> (%) |
|-------|----------------|--------|-----------------------------|
| 1     | 12W Green LEDs | 5:9    | 97                          |
| 2     | Dark           | 4:9    | 38                          |
| 3     | Ambient light  | 1:2    | 88                          |

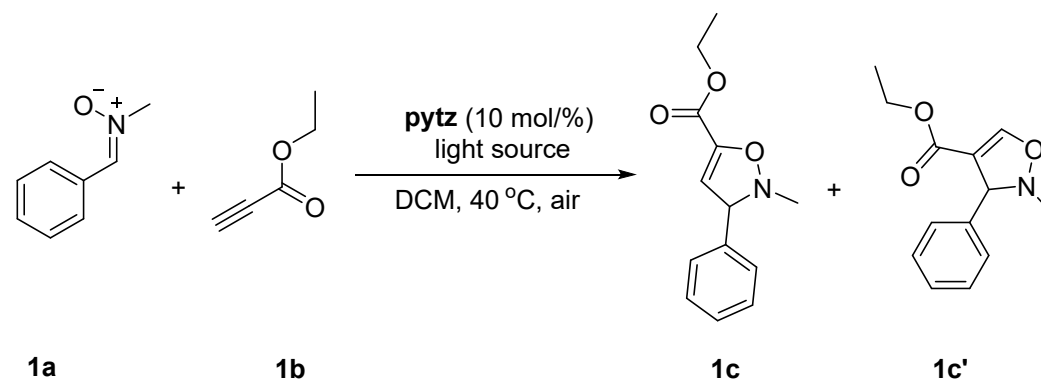

The optimal conditions for this reaction are as follows: 0.1 equivalents of 3,6-bis(2-pyridinyl)-1,2,4,5-tetrazine (**pytz**) as the catalyst, irradiation with 12 W green LEDs, a molar ratio of substrates **1a** to **1b** of 1:10, dichloromethane as the solvent, air as the oxidant, and a reaction temperature of 40 °C for a duration of 3 hours.

## 2. Control experiments

### 2.1 LC-MS analysis of reaction mixture and isolation of H<sub>2</sub>pytz

To elucidate the reaction mechanism, liquid chromatography – mass spectrometry (LC – MS) analysis was performed on the mixture obtained from the standard reaction, as follows. In addition to reactant **1a**, catalyst **pytz**, and products **1c** and **1c'** signals corresponding to **H<sub>2</sub>pytz** and by-product **1f** were detected. **H<sub>2</sub>pytz** was successfully isolated from the reaction mixture, and its structure was confirmed by <sup>1</sup>H NMR and high-resolution mass spectrometry (HRMS), with data consistent with previously reported literature values. [4] Although **1f** could not be fully characterized due to low yield and instability, its high-resolution mass spectrum was obtained (Figure S96). The experimental molecular ion peak agrees well with the theoretical value, and the isotopic distribution pattern matches the simulated isotope profile.

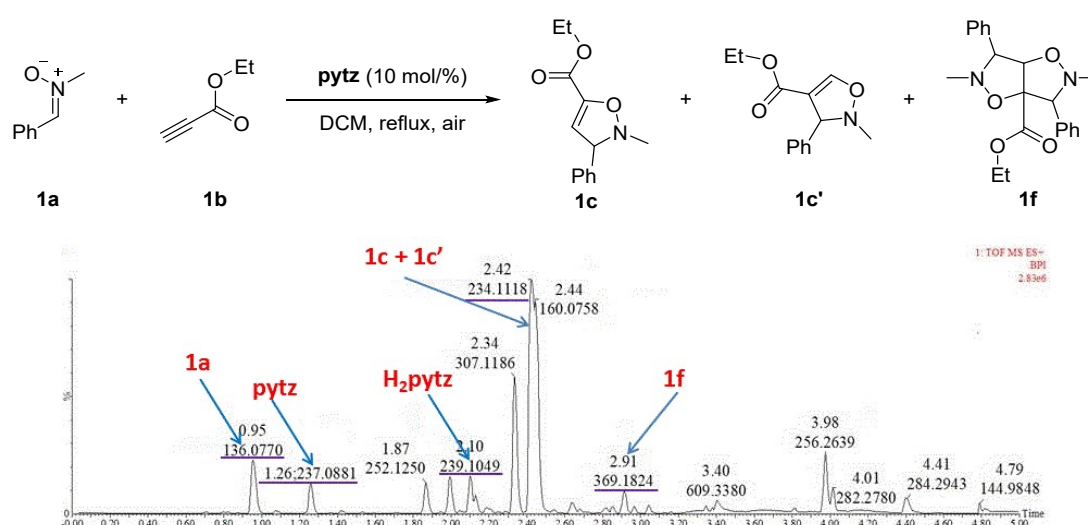

Figure S2 LC-MS of reaction mixture of **1a** with **1b** catalyzed by **pytz**

### 2.2 Add TEMPO to the standard reaction mixture under controlled conditions.

A radical trap (TEMPO) was introduced at a 1:1 molar ratio relative to **pytz** under optimized reaction conditions. <sup>1</sup>H NMR analysis revealed a significant decrease in product yield, dropping from 97% to 41%, with no detectable peaks corresponding to **H<sub>2</sub>pytz**. This result indicates that TEMPO effectively suppressed the catalytic reduction mediated by **pytz**, thereby supporting the involvement of a radical-based mechanism.

[4] S. Ray, R. Biswas, R. Banerjee, A. B. Ghosh and P. Biswas, Non-Aggregation-Induced Colorimetric Detection of Ag<sup>+</sup> by Tetrazine-Capped Gold Nanoparticles Based on the Formation of Au-Ag Core-Shell Nanoparticles, *ChemistrySelect*, 2019, **4**, 12409-12417.

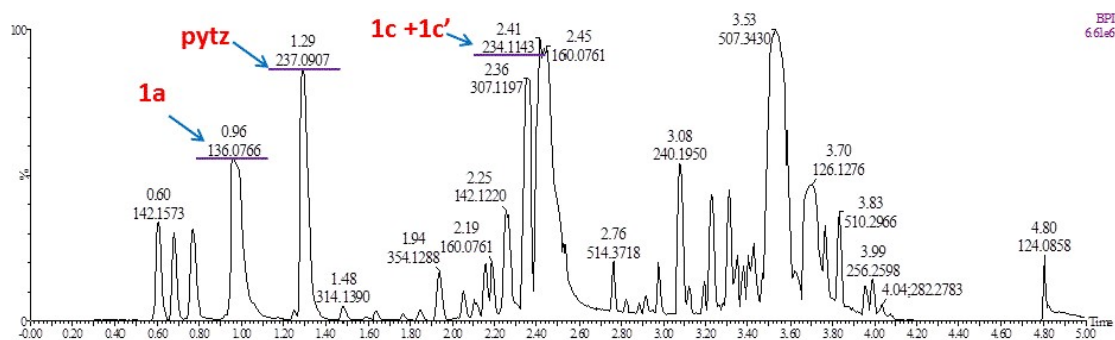

Figure S3 LC-MS of the reaction mixture with TEMPO added under standard reaction conditions

### 2.3 Cyclic voltammetry analysis

To elucidate the catalytic mechanism of the catalyst **pytz** in this reaction and to determine whether a single-electron transfer process (SET) occurs between **pytz** and the substrate, cyclic voltammetry experiments were conducted. Dichloromethane (HPLC grade) was used as the solvent, and tetrabutylammonium hexafluorophosphate (10 mM) served as the supporting electrolyte. A standard three-electrode system was employed, consisting of a glassy carbon working electrode, an Ag/AgCl reference electrode, and a platinum counter electrode. Ferrocene was added as an internal standard for potential calibration. Prior to each measurement, all solutions were degassed by purging with high-purity argon gas for at least 2 minutes to minimize interference from dissolved oxygen.

First, a dichloromethane solution of ferrocene (10 mM) was employed for electrochemical testing, and the results are presented in Figure S4. Ferrocene exhibits reversible redox behavior, with an oxidation peak potential at 0.72 V vs. reference and a reduction peak potential at 0.31 V vs. reference, indicating effective performance of the three-electrode system.

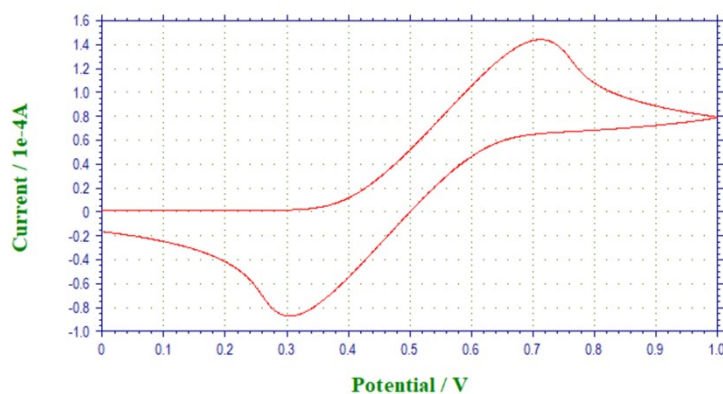

Figure S4 Cyclic voltammetry of ferrocene in dichloromethane: voltage range from 0 to 1 V; scan rate of 50 mV/s

Subsequently, the electrochemical response of pure dichloromethane solvent was measured (Figure S5), which displays an irreversible reduction wave with an inflection potential of approximately  $-0.80$  V.

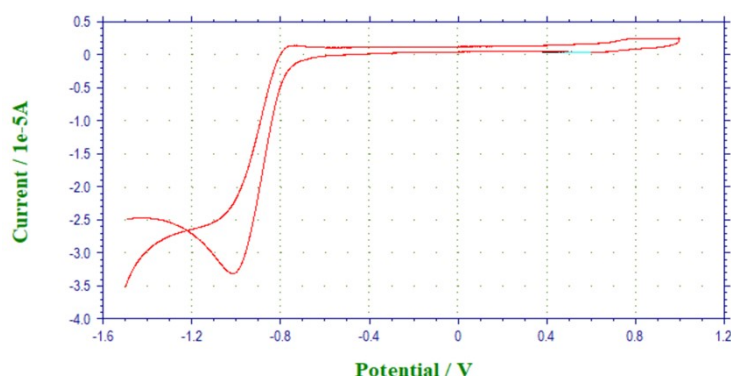

Figure S5 Cyclic voltammetry of the pure solvent DCM was conducted over a voltage range of 1.0 to -1.5 V at a scan rate of 50 mV/s

Next, cyclic voltammetry of **pytz** (10 mM) was conducted, and the resulting data are shown in Figure S6. **Pytz** demonstrates a reversible redox process, characterized by an oxidation peak potential of approximately -0.70 V (with a current of 0.038 mA) and a reduction peak potential of -1.00 V (with a current of 0.121 mA). The redox peak potential separation for **pytz** is 0.30 V, which is in good agreement with literature values. [5]

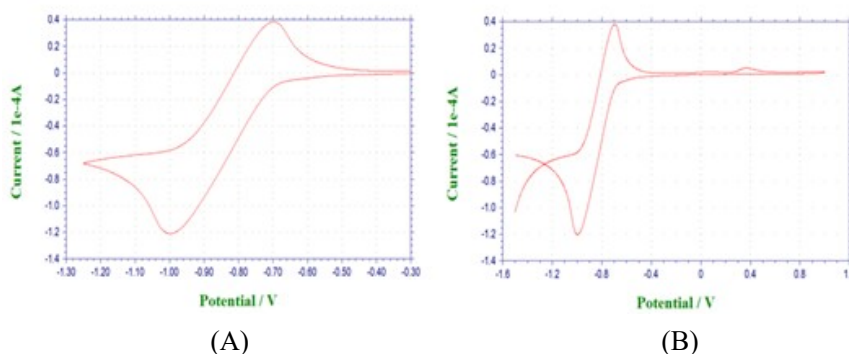

Figure S6 Cyclic voltammetry of **pytz** in dichloromethane: (A) voltage range from -0.30 to -1.25 V; (B) voltage range from 1.5 to -1.5 V; scan rate: 50 mV/s

Finally, cyclic voltammetry measurements were carried out for the two substrates involved in the standard reaction: nitrone (**1a**) and ethyl propiolate (**1b**), with results displayed in Figures S7 and S8, respectively. The concentrations of both substrates were maintained at 10 mM. As illustrated in the figure S5, S7 and S8, their cyclic voltammetry (CV) profiles exhibit nearly complete overlap with those of the pure solvent (dichloromethane, DCM), indicating that the applied electrode potential lacks significant catalytic activity toward the two substrates—specifically, the potential is insufficient to induce oxidation of either compound.

[5] G. Clavier and P. Audebert, *s*-Tetrazines as Building Blocks for New Functional Molecules and Molecular Materials, *Chem. Rev.*, 2010, **110**, 3299-3314.

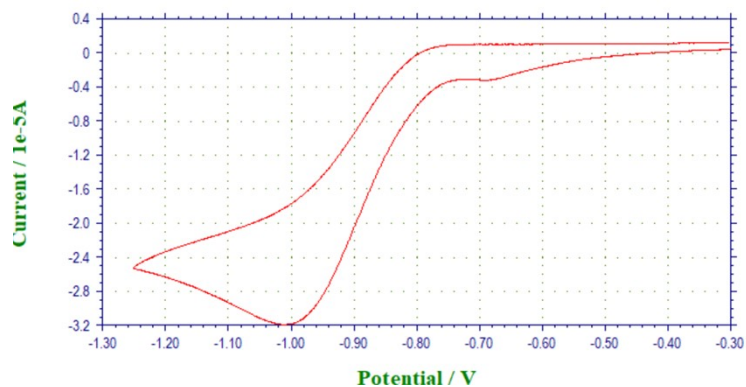

Figure S7 Cyclic voltammety of nitrone **1a** was conducted in dichloromethane (DCM) over a potential range of -0.30 to -1.25 V versus the reference electrode, with a scan rate of 50 mV/s

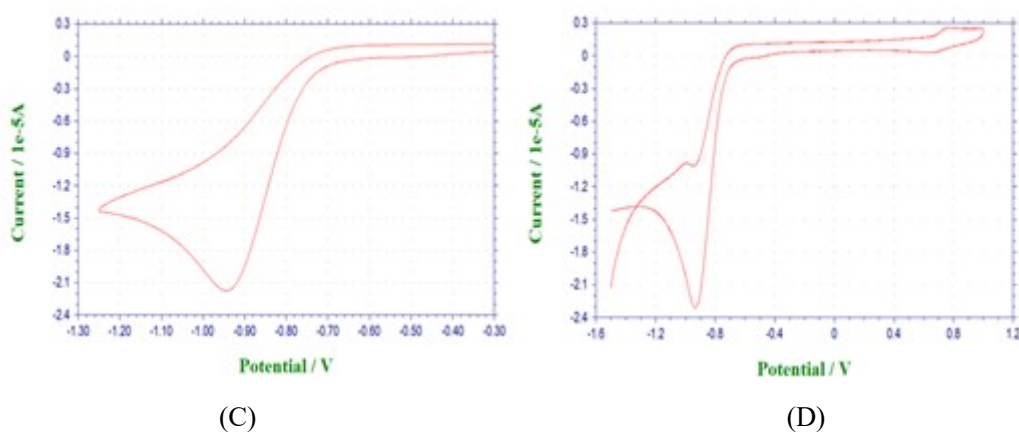

Figure S8 Cyclic voltammety of ethyl propiolate (**1b**) in dichloromethane: (C) voltage range from -0.30 to -1.25 V; (D) voltage range from 1.5 to -1.5 V, with a scan rate of 50 mV/s

Subsequently, **pytz** was mixed with **1b** in a 1:1 molar ratio. The resulting solution, prepared in dichloromethane, was subjected to cyclic voltammety analysis (Figure S9). The CV curve reveals a weak oxidation peak at  $-0.8$  V and a corresponding reduction peak at  $-0.75$  V, with a reduction peak current of 58 mA. Concurrently, a decrease in the oxidation peak intensity of **pytz** is observed, suggesting that **pytz** exhibits catalytic activity toward **1b**. This behavior implies the occurrence of a single-electron transfer (SET) process between **pytz** and **1b**.

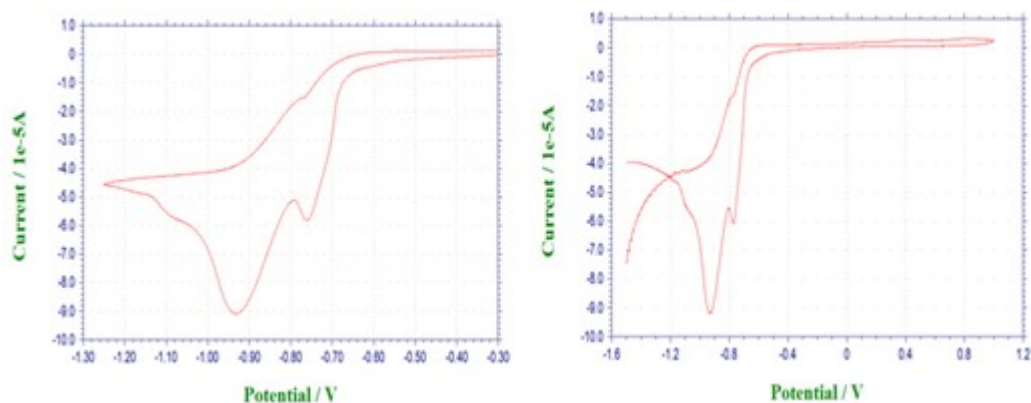

(E)

(F)

Figure S9 Cyclic voltammetry of ethyl propargyl and **pytz** in dichloromethane at a molar ratio of 2:1 was performed over two voltage ranges: (E)  $-0.30$  to  $-1.25$  V and (F)  $-1.50$  to  $+1.50$  V, with a scan rate of  $50$  mV/s

In contrast, when a dichloromethane solution containing **pytz** and **1a** in a 1:2 molar ratio was tested, the resulting voltammogram closely matched that of **pytz** alone, with no additional reduction peaks detected, indicating the absence of a SET interaction between **pytz** and **1a** (Figure S10).

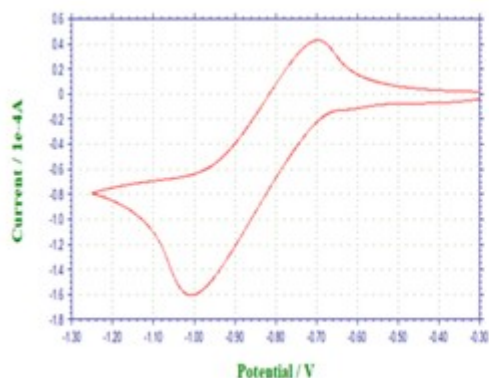

(G)

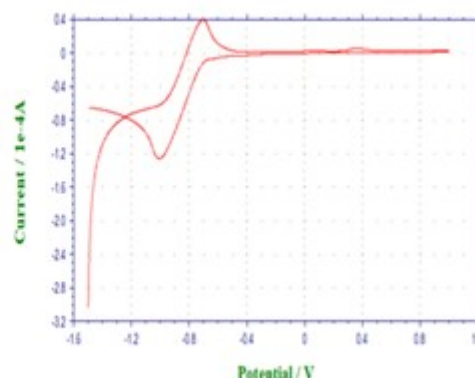

(H)

Figure S10 Cyclic voltammetry of nitron **1a** and **pytz** in dichloromethane at a molar ratio of 2:1 was performed over two voltage ranges: (G)  $-0.30$  to  $-1.25$  V and (H)  $1.5$  to  $-1.5$  V, with a scan rate of  $50$  mV/s

These findings collectively demonstrate that **pytz** undergoes a specific single-electron transfer reaction with **1b**, but not with **1a**.

### 3. Synthesis of nitrones

General method:

Method A:

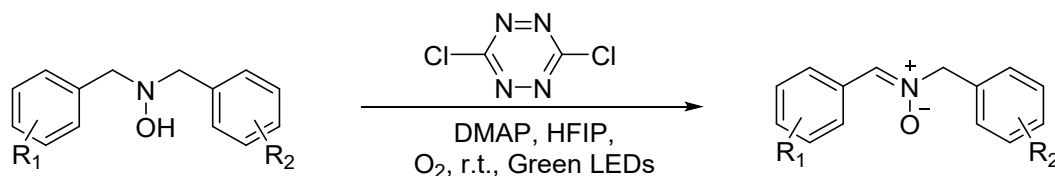

According to the previously reported procedure,<sup>[6]</sup>  $N,N$ -dibenzylhydroxylamine, 3,6-dichlorotetrazine (10 mol%), DMAP (2.1 equiv.), and HFIP were sequentially introduced into a Schlenk tube. Following the bubbling  $O_2$  for one minute, the reaction was stirred under an oxygen atmosphere and irradiated with green light for 16 hours. Upon completion, the organic solvent was

[6] Lyu, J.; Le, T.; Claraz, A.; Allain, C.; Audebert, P.; Masson, G. *s*-Tetrazine: robust and green photoorganocatalyst for aerobic oxidation of  $N,N$ -disubstituted hydroxylamines to nitrones. *Synlett* 2022, **33** (02), 177-181.

removed *via* rotary evaporation, and the target product was obtained through column chromatography.

Method B:

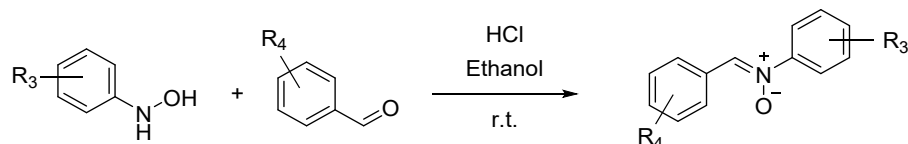

According to the reported literature, [7] N-phenylhydroxylamine was introduced into a 100 mL three-necked flask, followed by the addition of one equivalent of aromatic aldehyde and a few drops of hydrochloric acid. The reaction mixture was then stirred at room temperature for approximately two hours, with the progress monitored by thin-layer chromatography (TLC) until the reaction reached completion. Upon completion, the organic solvents were removed under reduced pressure, and the target compound was further purified by column chromatography followed by recrystallization.

Method C:

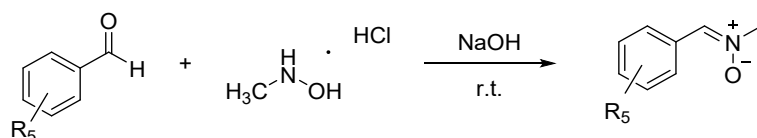

According to the literature, [8] an aqueous sodium hydroxide solution of N-methylhydroxylamine hydrochloride was introduced into a 100 mL three-necked flask, followed by the addition of one equivalent of aromatic aldehyde. The reaction mixture was stirred at room temperature for one hour. Subsequently, the mixture was extracted multiple times with chloroform. The organic layer was collected, dried over anhydrous magnesium sulfate, filtered, and concentrated under vacuum. The resulting crude product was further purified by column chromatography to yield the pure compound.

Table S8 Summary of synthetic nitrones (**1a-15a**)

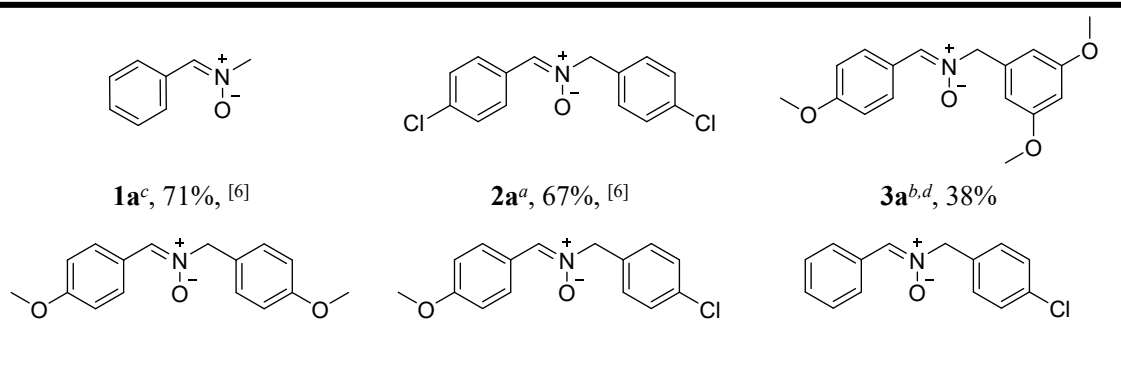

[7] Martínez-Pardo, P.; Blay, G.; Escrivá-Palomo, A.; Sanz-Marco, A.; Vila, C.; Pedro, J. R. Catalytic Diastereo- and Enantioselective Synthesis of 2-Imidazolinones. *Org. Lett.* 2019, **21** (11), 4063-4066.

[8] Tyrrell, E.; Allen, J.; Jones, K.; Beauchet, R. Asymmetric 1,3-Dipolar Cycloaddition Reactions of Nitrones with (S)-(-)-4-Benzyl-N-methacryloyl-2-oxazolidinone. *Synthesis* 2005, **14**, 2393-2399.

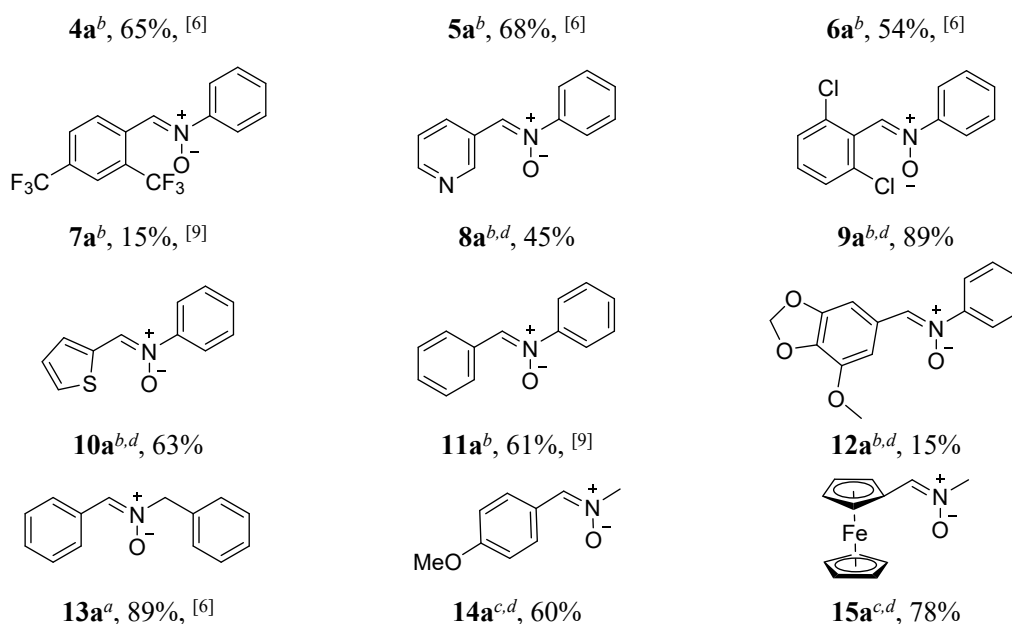

<sup>a</sup> It was prepared by Method A; <sup>b</sup> It was prepared by Method B; <sup>c</sup> It was prepared by Method C; <sup>d</sup> new compound

All the synthesized nitrones are presented in Table S8. Among these, seven nitrones are novel compounds, and their <sup>1</sup>H NMR, <sup>13</sup>C NMR, and HRMS data are provided below.

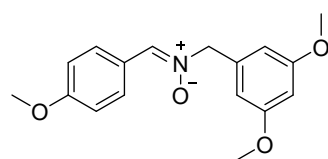

**(Z)-N-(3,5-dimethoxybenzyl)-1-(4-methoxyphenyl)methanimine oxide (3a)**

White solid, Yield: 38%, mp: 112-113 °C, <sup>1</sup>H NMR (600 MHz, DMSO-*d*<sub>6</sub>) δ 7.99 (s, 1H), 7.48 – 7.40 (m, 4H), 6.98 – 6.92 (m, 2H), 6.56 (t, *J* = 2.3 Hz, 1H), 4.96 (s, 2H), 3.75 (s, 3H), 3.74 (s, 6H). <sup>13</sup>C NMR (151 MHz, DMSO-*d*<sub>6</sub>) δ 160.08, 159.39, 132.79, 130.60, 126.61, 113.75, 105.68, 102.38, 69.74, 55.19, 55.13, 39.52. C<sub>17</sub>H<sub>19</sub>NO<sub>4</sub> [M+H]<sup>+</sup>*m/z*: Calc. 302.1387, Found 302.1386.

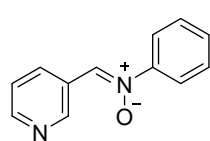

**(Z)-N-phenyl-1-(pyridin-3-yl)methanimine oxide (8a)**

Yellowish solid, Yield: 45%, mp: 92-93 °C, <sup>1</sup>H NMR (600 MHz, DMSO-*d*<sub>6</sub>) δ 9.26 – 9.21 (m, 1H), 8.71 (dt, *J* = 4.3, 1.9 Hz, 1H), 8.46 (d, *J* = 1.6 Hz, 1H), 7.97 – 7.91 (m, 3H), 7.53 (dt, *J* = 5.0, 2.2 Hz, 3H), 7.44 (ddt, *J* = 6.3, 4.6, 1.4 Hz, 1H). <sup>13</sup>C NMR (151 MHz, DMSO-*d*<sub>6</sub>) δ 149.89, 149.56, 148.23, 136.85, 134.38, 130.30, 129.15, 124.65, 122.98, 121.54. C<sub>12</sub>H<sub>10</sub>N<sub>2</sub>O [M+H]<sup>+</sup>*m/z*: Calc. 199.0866, Found 199.0866.

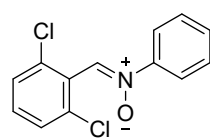

**(Z)-1-(2,6-dichlorophenyl)-N-phenylmethanimine oxide (9a)**

White solid, Yield: 89%, mp: 95-96 °C, <sup>1</sup>H NMR (600 MHz, Chloroform-*d*) δ 8.06 (s, 1H), 7.86 – 7.80 (m, 2H), 7.55 – 7.48 (m, 3H), 7.43 – 7.38 (m, 2H), 7.33 (dd, *J* = 8.7, 7.4 Hz, 1H). <sup>13</sup>C NMR (151 MHz, DMSO-*d*<sub>6</sub>) δ 147.10, 134.65, 131.69, 130.67, 129.41, 129.26, 128.90, 128.22, 121.56. C<sub>13</sub>H<sub>9</sub>Cl<sub>2</sub>NO [M+H]<sup>+</sup>*m/z*: Calc. 266.0134, Found 266.0136.

**(Z)-N-phenyl-1-(thiophen-2-yl)methanimine oxide (10a)**

[9] Prakash, P.; Gravel, E.; Nguyen, D. V.; et al. Direct and Co-catalytic Oxidation of Hydroxylamines to Nitrones Promoted by Rhodium Nanoparticles Supported on Carbon Nanotubes. *ChemCatChem* 2017, **9**(12), 2091-2094.

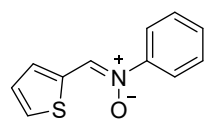

Brown solid, Yield: 63%, mp: 96-97 °C, <sup>1</sup>H NMR (600 MHz, Chloroform-*d*) δ 8.49 (d, *J* = 0.7 Hz, 1H), 7.87 – 7.81 (m, 2H), 7.62 (dt, *J* = 3.9, 0.8 Hz, 1H), 7.57 (dt, *J* = 5.1, 0.9 Hz, 1H), 7.52 – 7.42 (m, 3H), 7.22 (dd, *J* = 5.1, 3.9 Hz, 1H). <sup>13</sup>C NMR (151 MHz, DMSO-*d*<sub>6</sub>) δ 145.98 , 132.86 , 131.70 , 129.75 , 129.66 , 129.12 , 128.75 , 127.22 , 120.68. C<sub>11</sub>H<sub>9</sub>NOS [M+H]<sup>+</sup>m/z: Calc. 204.0478, Found 204.0476.

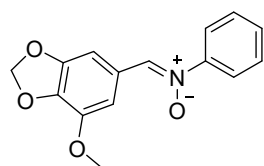

**(Z)-1-(7-methoxybenzo[d][1,3]dioxol-5-yl)-N-phenylmethanimine oxide (12a)**

Colourless liquid, Yield: 15%, <sup>1</sup>H NMR (600 MHz, DMSO-*d*<sub>6</sub>) δ 8.43 (s, 1H), 7.97 (d, *J* = 1.3 Hz, 1H), 7.90 – 7.85 (m, 3H), 7.57 – 7.51 (m, 2H), 7.51 – 7.47 (m, 1H), 6.10 (s, 2H), 3.87 (s, 3H). <sup>13</sup>C NMR (151 MHz, DMSO-*d*<sub>6</sub>) δ 148.35 , 148.07 , 142.82 , 136.91 , 133.15 , 129.64 , 129.05 , 125.64 , 121.25 , 109.61 , 102.60 , 101.90 , 56.19 , 39.52 . C<sub>15</sub>H<sub>13</sub>NO<sub>4</sub> [M+H]<sup>+</sup>m/z: Calc. 272.0918, Found 272.0919.

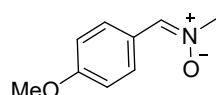

**(Z)-1-(4-methoxyphenyl)-N-methylmethanimine oxide (14a)**

Yellowish solid, Yield: 60%, mp: 91-92 °C, <sup>1</sup>H NMR (600 MHz, Chloroform-*d*) δ 8.24 – 8.16 (m, 2H), 7.30 (s, 1H), 6.96 – 6.90 (m, 2H), 3.84 (s, 6H). <sup>13</sup>C NMR (151 MHz, DMSO-*d*<sub>6</sub>) δ 160.13 , 133.33 , 129.67 , 124.08 , 113.68 , 55.17 , 53.59 , .C<sub>9</sub>H<sub>11</sub>NO<sub>2</sub> [M+H]<sup>+</sup>m/z: Calc 166.0863, Found 166.0863.

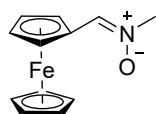

**(Z)-N-methyl-1-ferrocenylmethanimine oxide (15a)**

Reddish brown solid, Yield: 78%, mp: 118-119 °C, <sup>1</sup>H NMR (600 MHz, DMSO-*d*<sub>6</sub>) δ 7.44 (s, 1H), 4.98 (s, 2H), 4.37 (s, 2H), 4.17 (s, 5H), 3.58 (s, 3H). <sup>13</sup>C NMR (151 MHz, DMSO-*d*<sub>6</sub>) δ 133.58 , 74.78 , 69.43 , 69.08 , 68.79 , 52.78. C<sub>12</sub>H<sub>13</sub>FeNO [M+H]<sup>+</sup>m/z: Calc. 244.0420, Found 244.0421.

#### 4. Alkynyl ester

Four alkynes, including both symmetrical and asymmetrical ones, were employed in the paper and are presented in Table S9.

Table S9 Range of alkynyl ester (**1b-4b**)<sup>a</sup>

| Entry | No.       | R <sub>3</sub>     | R <sub>4</sub>     | Structure                                                                            |
|-------|-----------|--------------------|--------------------|--------------------------------------------------------------------------------------|
| 1     | <b>1b</b> | H                  | CO <sub>2</sub> Et | 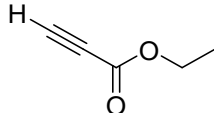   |
| 2     | <b>2b</b> | Ph                 | CO <sub>2</sub> Me |    |
| 3     | <b>3b</b> | CO <sub>2</sub> Et | CO <sub>2</sub> Et |   |
| 4     | <b>4b</b> | CF <sub>3</sub>    | CO <sub>2</sub> Et |  |

<sup>a</sup> All of alkynyl esters were purchased from commercial suppliers and used without further purification.

#### 5. Synthesis of 2,3-dihydroisoxazoles

The general method for the synthesis of 2,3-dihydroisoxazole is as follows. In a 50 mL three-neck round-bottom flask, 0.5 mmol of nitron, 0.1 eq. of **pytz**, and 3 mL of dichloromethane were sequentially introduced, followed by the addition of 5 mmol of ethyl propiolate using a pipette. The reaction mixture was irradiated with green light, with the flask positioned 2–5 cm from the light source, and stirred at 40 °C for at least 3 hours. TLC was used to monitor the reaction progress, with reaction time varying depending on the substrate. Once TLC confirmed complete conversion of nitron, the reaction was cooled to room temperature, and the organic solvent and residual ethyl propiolate were removed by vacuum. The target product was then purified by column chromatography (For those separable *cis-trans* isomers, multiple PTLC purifications could be used.)

**Ethyl 2-methyl-3-phenyl-2,3-dihydroisoxazole-5-carboxylate (1c), Ethyl 2-methyl-3-phenyl-2,3-dihydroisoxazole-4-carboxylate (1c')**

Colorless oily liquid, Yield: 97% (**1c:1c'**=5:9)  $^1\text{H}$  NMR (600 MHz,  $\text{DMSO-}d_6$ )  $\delta$  7.94 – 7.92 (m,

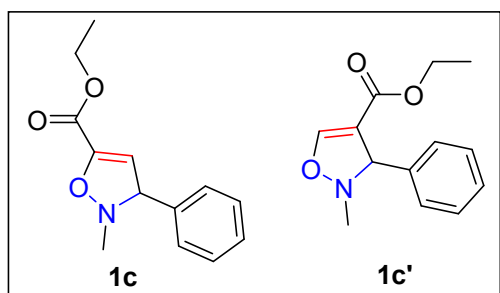

1H), 7.39 – 7.24 (m, 21H), 6.11 (d,  $J$  = 3.0 Hz, 3H), 4.98 (dd,  $J$  = 35.2, 2.4 Hz, 4H), 4.21 (qd,  $J$  = 7.1, 2.8 Hz, 6H), 4.09 – 3.96 (m, 3H), 2.85 (d,  $J$  = 20.0 Hz, 14H), 1.24 (t,  $J$  = 7.1 Hz, 12H), 1.12 (t,  $J$  = 7.1 Hz, 4H).  $^{13}\text{C}$  NMR (151 MHz,  $\text{DMSO-}d_6$ )  $\delta$  153.03, 143.83, 128.44, 128.16, 127.63, 127.56, 127.09, 126.71, 110.75, 74.82, 72.69, 61.19, 59.49, 47.17, 46.66, 39.52, 14.06, 13.89.

HRMS(ESI)  $\text{C}_{13}\text{H}_{15}\text{NO}_3$   $[\text{M}+\text{H}]^+ m/z$ : Calc 234.1125, Found 234.1126.

**Ethyl 2-(4-chlorobenzyl)-3-(4-chlorophenyl)-2,3-dihydroisoxazole-5-carboxylate (2c), ethyl 2-(4-chlorobenzyl)-3-(4-chlorophenyl)-2,3-dihydroisoxazole-4-carboxylate (2c')**

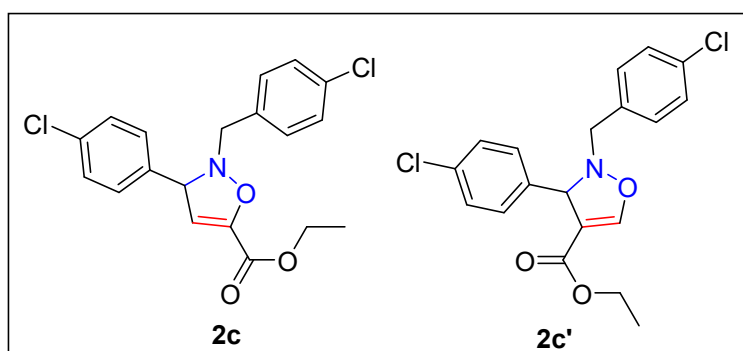

Colorless oily liquid, Yield: 42% (**2c:2c'**=2:3)  $^1\text{H}$  NMR (600 MHz,  $\text{DMSO-}d_6$ )  $\delta$  7.96 (d,  $J$  = 1.5 Hz, 1H), 7.44 – 7.35 (m, 13H), 7.35 – 7.31 (m, 2H), 7.29 (d,  $J$  = 8.5 Hz, 3H), 6.18 (d,  $J$  = 3.1 Hz, 1H), 5.24 (dd,  $J$  = 15.1, 2.3 Hz, 2H), 4.28 – 4.15 (m,

6H), 4.15 – 4.04 (m, 2H), 4.04 – 3.97 (m, 2H), 1.22 (t,  $J$  = 7.1 Hz, 3H), 1.12 (t,  $J$  = 7.1 Hz, 4H).  $^{13}\text{C}$  NMR (151 MHz,  $\text{DMSO-}d_6$ )  $\delta$  192.06, 160.08, 158.34, 144.26, 139.56, 135.46, 134.48, 132.26, 132.06, 131.14, 130.90, 130.03, 129.33, 128.93, 128.84, 128.50, 128.48, 128.42, 128.15, 110.85, 90.13, 71.69, 61.64, 61.26, 39.52, 13.91. HRMS(ESI)  $\text{C}_{19}\text{H}_{17}\text{Cl}_2\text{NO}_3$   $[\text{M}+\text{H}]^+ m/z$ : Calc 378.0659, Found 378.0657

**Ethyl 2-(4-chlorobenzyl)-3-phenyl-2,3-dihydroisoxazole-5-carboxylate (3c), ethyl 2-(4-chlorobenzyl)-3-phenyl-2,3-dihydroisoxazole-4-carboxylate (3c')**

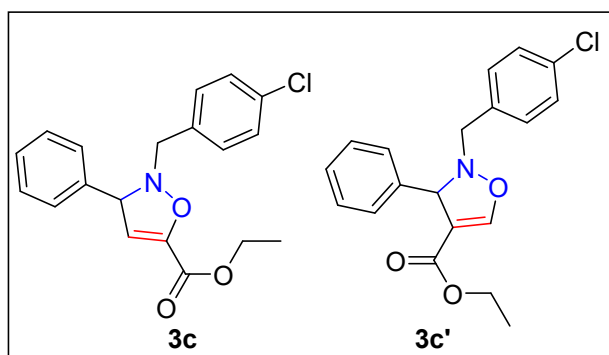

Colorless oily liquid, Yield: 78% (**3c:3c'**=3:4)  $^1\text{H}$  NMR (600 MHz,  $\text{DMSO-}d_6$ )  $\delta$  7.97 (s, 1H), 7.42 – 7.33 (m, 9H), 7.33 – 7.24 (m, 9H), 6.17 (d,  $J$  = 3.1 Hz, 1H), 5.23 (dd,  $J$  = 11.1, 2.3 Hz, 2H), 4.27 (d,  $J$  = 13.7 Hz, 2H), 4.21 (dtd,  $J$  = 10.2, 7.0, 3.7 Hz, 3H), 4.11 (s, 1H), 4.09 – 3.97 (m, 3H), 1.23 (t,  $J$  = 7.1 Hz, 3H), 1.13 (t,  $J$  = 7.1 Hz, 4H).  $^{13}\text{C}$  NMR (151 MHz,  $\text{DMSO-}d_6$ )  $\delta$  193.11,

192.02, 158.40, 153.59, 144.35, 139.67, 136.22, 132.22, 131.13, 129.44, 129.32, 129.18, 129.10, 129.07, 128.92, 128.82, 128.81, 128.70, 128.68, 128.48, 128.45, 128.39, 128.37,

128.36 , 128.23 , 128.20 , 128.18 , 127.50 , 127.43 , 127.07 , 110.70 , 71.57 , 62.47 , 61.24 , 59.62 , 39.52 , 14.09 , 13.91 . HRMS(ESI)  $C_{19}H_{18}ClNO_3$   $[M+H]^+$   $m/z$ : Calc. 344.1048, Found 344.1044.

**Ethyl 2-(4-chlorobenzyl)-3-(4-methoxyphenyl)-2,3-dihydroisoxazole-5-carboxylate (4c), ethyl 2-(4-chlorobenzyl)-3-(4-methoxyphenyl)-2,3-dihydroisoxazole-4-carboxylate (4c')**

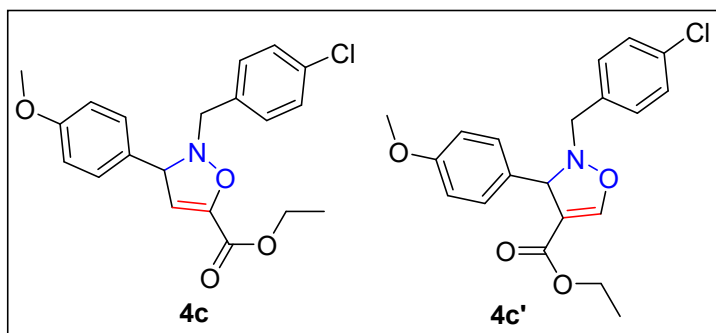

Colorless oily liquid, Yield: 80% (**4c:4c'**=2:3)  $^1H$  NMR (600 MHz,  $DMSO-d_6$ )  $\delta$  7.96 (s, 1H), 7.37 (td,  $J$  = 9.1, 2.4 Hz, 3H), 7.33 – 7.21 (m, 7H), 6.88 (dq,  $J$  = 7.9, 2.6 Hz, 3H), 6.14 (t,  $J$  = 2.7 Hz, 1H), 5.19 (dt,  $J$  = 8.7, 2.4 Hz, 2H), 4.23 – 4.17 (m,

3H), 4.15 – 3.97 (m, 4H), 3.73 (d,  $J$  = 2.4 Hz, 5H), 1.23 (td,  $J$  = 7.1, 2.5 Hz, 2H), 1.12 (td,  $J$  = 7.1, 2.5 Hz, 3H).  $^{13}C$  NMR (151 MHz,  $DMSO-d_6$ )  $\delta$  191.19 , 158.70 , 158.42 , 153.67 , 144.42 , 139.75 , 132.28 , 132.18 , 131.77 , 130.61 , 130.53 , 130.03 , 129.97 , 129.32 , 128.90 , 128.87 , 128.46 , 128.43 , 128.21 , 127.86 , 114.79 , 114.46 , 114.10 , 113.60 , 110.58 , 71.18 , 61.81 , 61.23 , 59.60 , 54.98 , 39.52 , 14.08 , 13.91 . HRMS(ESI)  $C_{20}H_{20}ClNO_4$   $[M+H]^+$   $m/z$ : Calc 374.1154, Found 374.1153.

**Ethyl 2-(3,5-dimethoxybenzyl)-3-(4-methoxyphenyl)-2,3-dihydroisoxazole-5-carboxylate (5c), ethyl 2-(3,5-dimethoxybenzyl)-3-(4-methoxyphenyl)-2,3-dihydroisoxazole-4-carboxylate (5c')**

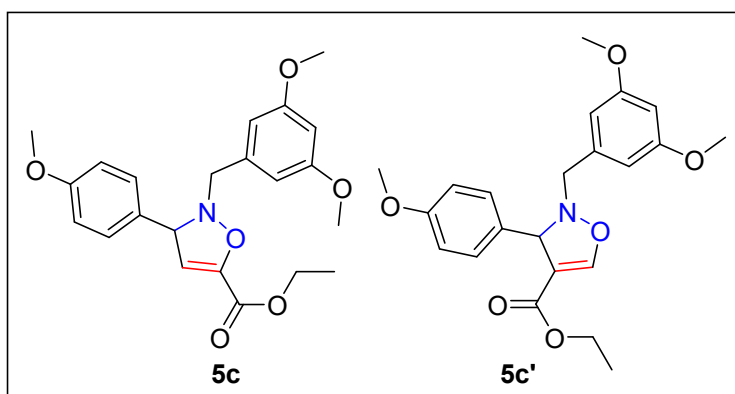

Yellow oily liquid, Yield: 64% (**5c:5c'**=1:1);  $^1H$  NMR (600 MHz,  $DMSO-d_6$ )  $\delta$  7.95 (d,  $J$  = 1.4 Hz, 1H), 7.34 – 7.27 (m, 4H), 6.93 – 6.88 (m, 4H), 6.44 – 6.37 (m, 4H), 6.30 (d,  $J$  = 2.3 Hz, 2H), 5.10 (dd,  $J$  = 19.2, 2.4 Hz, 2H), 4.24 – 4.17 (m, 4H), 4.10 – 4.00 (m, 4H), 3.76 – 3.65 (m, 18H), 1.23 (t,

$J$  = 7.1 Hz, 3H), 1.14 (t,  $J$  = 7.1 Hz, 3H).  $^{13}C$  NMR (151 MHz,  $DMSO-d_6$ )  $\delta$  162.99 , 160.54 , 160.31 , 158.78 , 153.71 , 143.38 , 130.73 , 130.72 , 127.66 , 113.65 , 113.63 , 110.69 , 108.58 , 105.08 , 104.48 , 99.10 , 99.08 , 71.68 , 69.72 , 62.46 , 61.84 , 61.20 , 59.57 , 55.12 , 55.04 , 55.03 , 55.01 , 39.52 , 14.15 , 13.93 . HRMS(ESI)  $C_{22}H_{25}NO_6$   $[M+H]^+$   $m/z$ : Calc 400.1755, Found 400.1757

**Ethyl 2-benzyl-3-phenyl-2,3-dihydroisoxazole-5-carboxylate (6c), ethyl 2-benzyl-3-phenyl-2,3-dihydroisoxazole-4-carboxylate (6c')**

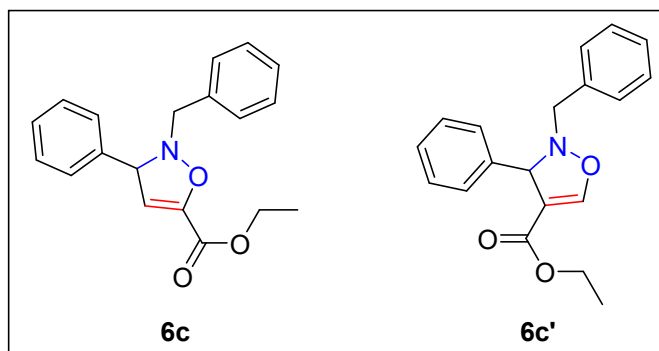

Colorless oily liquid, Yield: 84% (**6c:6c'**=3:1) <sup>1</sup>H NMR (600 MHz, DMSO-*d*<sub>6</sub>) δ 7.94 – 7.92 (m, 1H), 7.39 – 7.24 (m, 21H), 6.11 (d, *J* = 3.0 Hz, 3H), 4.98 (dd, *J* = 35.2, 2.4 Hz, 4H), 4.21 (qd, *J* = 7.1, 2.8 Hz, 6H), 4.09 – 3.96 (m, 3H), 2.85 (d, *J* = 20.0 Hz, 14H), 1.24 (t, *J* = 7.1 Hz, 12H), 1.12 (t, *J* = 7.1 Hz, 4H). <sup>13</sup>C

NMR (151 MHz, DMSO-*d*<sub>6</sub>) δ 153.03 , 143.83 , 128.44 , 128.16 , 127.63 , 127.56 , 127.09 , 126.71 , 110.75 , 74.82 , 72.69 , 61.19 , 59.49 , 47.17 , 46.66 , 39.52 , 14.06 , 13.89 . HRMS(ESI) C<sub>13</sub>H<sub>15</sub>NO<sub>3</sub> [M+H]<sup>+</sup>*m/z*: Calc. 234.1125, Found 234.1126.

**Ethyl 3-(4-methoxyphenyl)-2-methyl-2,3-dihydroisoxazole-5-carboxylate (7c), ethyl 3-(4-methoxyphenyl)-2-methyl-2,3-dihydroisoxazole-4-carboxylate (7c')**

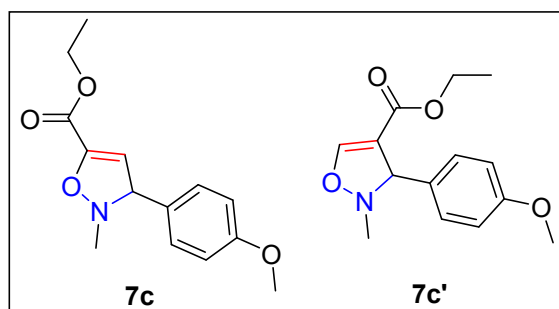

Colorless oily liquid, Yield: 80% (**7c:7c'**=1:5); <sup>1</sup>H NMR (600 MHz, Chloroform-*d*) δ 7.44 (dd, *J* = 1.7, 0.8 Hz, 1H), 7.31 – 7.22 (m, 2H), 6.90 – 6.83 (m, 2H), 5.86 (d, *J* = 2.8 Hz, 0H), 4.85 (d, *J* = 1.6 Hz, 1H), 4.16 – 4.02 (m, 2H), 3.77 (d, *J* = 4.7 Hz, 4H), 2.93 (s, 3H), 1.32 (t, *J* = 7.1 Hz, 1H), 1.18 (t, *J* = 7.1 Hz, 3H). <sup>13</sup>C NMR (151 MHz, CDCl<sub>3</sub>) δ 162.64, 158.32, 150.93, 127.32,

113.10, 112.83, 109.53, 109.05, 76.32, 76.11, 75.89, 72.62, 60.54, 58.99, 54.26, 54.19, 46.38, 13.17, 13.10, 0.00. HRMS(ESI) C<sub>14</sub>H<sub>17</sub>NO<sub>4</sub> [M+H]<sup>+</sup>*m/z*: Calc 264.1231, Found 264.1236

**Ethyl 2-(tert-butyl)-3-phenyl-2,3-dihydroisoxazole-5-carboxylate (8c), ethyl 2-(tert-butyl)-3-phenyl-2,3-dihydroisoxazole-4-carboxylate (8c')**

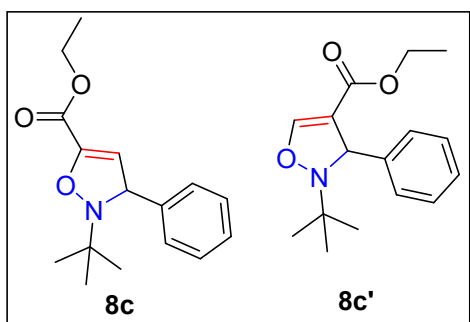

Colorless oily liquid, Yield: 20% (**8c:8c'**=1:6); <sup>1</sup>H NMR (600 MHz, DMSO-*d*<sub>6</sub>) δ 7.45 – 7.28 (m, 8H), 7.24 (dt, *J* = 12.9, 7.3 Hz, 2H), 5.89 (d, *J* = 3.0 Hz, 1H), 5.45 (d, *J* = 3.1 Hz, 1H), 4.20 (qd, *J* = 7.1, 2.0 Hz, 2H), 4.04 – 3.91 (m, 2H), 1.22 (t, *J* = 7.1 Hz, 3H), 1.16 – 1.02 (m, 21H). <sup>13</sup>C NMR (151 MHz, DMSO-*d*<sub>6</sub>) δ 158.26 , 153.37 , 144.39 , 128.33 , 127.95 , 127.51 , 127.17 , 127.06 , 126.84 , 111.58 ,

67.06 , 65.06 , 61.00 , 60.75 , 60.47 , 59.23 , 24.45 , 24.34 , 13.95 , 13.83 . HRMS(ESI)  $C_{16}H_{21}NO_3$   $[M+H]^+$   $m/z$ : Calc 276.1595, Found 276.1590

### Ethyl 3*aH*-isoxazolo[2,3-*a*]quinoline-2-carboxylate (**9c**)

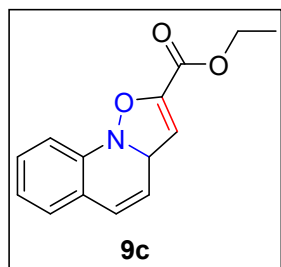

Yellow solid, Yield: 91%, mp: 112-113 °C,  $^1H$  NMR (600 MHz, Chloroform-*d*)  $\delta$  9.93 (s, 2H), 8.72 – 8.65 (m, 2H), 8.11 – 8.04 (m, 2H), 7.76 – 7.61 (m, 6H), 7.45 (ddd,  $J$  = 8.1, 6.9, 1.3 Hz, 2H), 4.30 (q,  $J$  = 7.1 Hz, 4H), 1.37 (t,  $J$  = 7.1 Hz, 6H).  $^{13}C$  NMR (151 MHz,  $CDCl_3$ )  $\delta$  188.83, 167.78, 154.84, 139.15, 135.92, 131.73, 127.74, 125.47, 123.85, 120.35, 118.72, 59.46, 14.52. HRMS(ESI)  $C_{14}H_{13}NO_3$   $[M+H]^+$   $m/z$ : Calc 244.0969, Found 244.0969

### Ethyl 6,6-dimethyl-3*a*,4,5,6-tetrahydropyrrolo[1,2-*b*]isoxazole-2-carboxylate (**10c**)

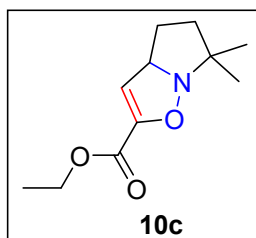

Yellow oily liquid, Yield: 86%;  $^1H$  NMR (600 MHz,  $cdCl_3$ )  $\delta$  7.23 (d,  $J$  = 1.4 Hz, 1H), 4.76 (ddd,  $J$  = 8.0, 2.9, 1.4 Hz, 1H), 4.20 – 4.09 (m, 2H), 2.14 (ddt,  $J$  = 13.1, 10.9, 8.0 Hz, 1H), 1.82 (ddt,  $J$  = 13.2, 7.5, 2.8 Hz, 1H), 1.70 – 1.59 (m, 2H), 1.32 (s, 3H), 1.24 (t,  $J$  = 7.1 Hz, 3H), 1.08 (s, 3H).  $^{13}C$  NMR (151 MHz, Chloroform-*d*)  $\delta$  163.91 , 152.28 , 110.70 , 70.16 , 67.83 , 59.97 , 34.49 , 32.41 , 26.28 , 23.49 , 14.45 . HRMS(ESI)  $C_{16}H_{21}NO_3$   $[M+H]^+$   $m/z$ : Calc 212.1282, Found 212.1276

### Ethyl 3-(2,6-dichlorophenyl)-2-phenyl-2,3-dihydroisoxazole-5-carboxylate (**11c**)

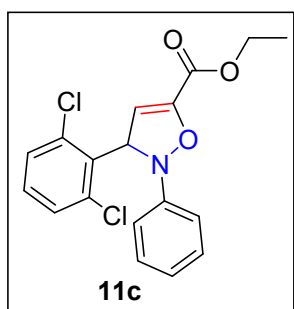

Colorless oily liquid, Yield: 46%;  $^1H$  NMR (600 MHz,  $DMSO-d_6$ )  $\delta$  8.08 (s, 1H), 7.65 (s, 1H), 7.56 (d,  $J$  = 8.1 Hz, 2H), 7.50 (dd,  $J$  = 7.9, 1.5 Hz, 1H), 7.24 – 7.18 (m, 2H), 6.91 – 6.81 (m, 3H), 4.19 (q,  $J$  = 7.1 Hz, 2H), 1.25 (t,  $J$  = 7.1 Hz, 3H).  $^{13}C$  NMR (151 MHz,  $CDCl_3$ )  $\delta$  160.42, 138.93, 136.65, 132.45, 131.30, 130.04, 129.52, 122.50, 121.76, 115.15, 93.54, 77.20, 76.99, 76.78, 60.57, 29.68, 14.44. HRMS(ESI)  $C_{18}H_{15}Cl_2NO_3$   $[M+H]^+$   $m/z$ : Calc 364.0502, Found 364.0499

### Methyl 2-benzyl-3,5-diphenyl-2,3-dihydroisoxazole-4-carboxylate (**12c'**)

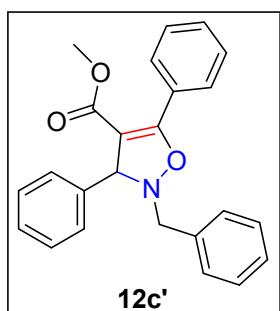

Colorless oily liquid, Yield: 81%;  $^1H$  NMR (600 MHz,  $DMSO-d_6$ )  $\delta$  7.78 – 7.73 (m, 2H), 7.57 – 7.51 (m, 1H), 7.50 – 7.42 (m, 4H), 7.40 – 7.25 (m, 8H), 5.41 (s, 1H), 4.39 (d,  $J$  = 13.4 Hz, 1H), 4.29 (d,  $J$  = 13.4 Hz, 1H), 3.52 (s, 3H).  $^{13}C$  NMR (151 MHz,  $DMSO-d_6$ )  $\delta$  163.45 , 161.75 , 141.45 , 136.16 , 131.31 , 129.60 , 129.30 , 128.38 , 128.31 , 128.06 , 127.63 , 127.57 , 127.02 , 126.92 , 103.04 , 72.77 , 65.00 ,

62.77 , 51.05 , 29.99 , 18.64 , 13.52 . HRMS(ESI)  $C_{24}H_{21}NO_3$   $[M+H]^+$   $m/z$ : Calc 370.1443, Measured 370.1448

**Methyl 6,6-dimethyl-2-phenyl-3a,4,5,6-tetrahydropyrrolo[1,2-*b*]isoxazole-3-carboxylate (13c')**

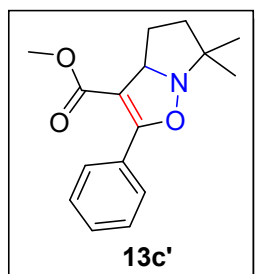

Yellow oily liquid, Yield: 68%;  $^1H$  NMR (600 MHz, Chloroform-*d*)  $\delta$  7.78 – 7.72 (m, 2H), 7.45 – 7.34 (m, 3H), 5.00 (dd,  $J = 8.1, 3.2$  Hz, 1H), 3.66 (s, 3H), 2.27 (ddt,  $J = 13.1, 10.7, 8.0$  Hz, 1H), 1.96 (ddt,  $J = 13.2, 8.4, 2.9$  Hz, 1H), 1.77 (ddd,  $J = 12.5, 10.8, 8.4$  Hz, 1H), 1.70 (ddd,  $J = 12.5, 7.8, 2.6$  Hz, 1H), 1.41 (s, 3H), 1.15 (s, 3H).  $^{13}C$  NMR (151 MHz, Chloroform-*d*)  $\delta$  164.27 , 162.14 , 130.66 , 129.29 , 127.76 , 127.41 , 104.31 , 70.55 , 70.01 , 50.97 , 34.60 , 33.49 , 26.11 , 23.42 . HRMS(ESI)  $C_{16}H_{19}NO_3$   $[M+H]^+$   $m/z$ : Calc 274.1438, Measured 274.1435

**Methyl 2-methyl-3,5-diphenyl-2,3-dihydroisoxazole-4-carboxylate (14c')**

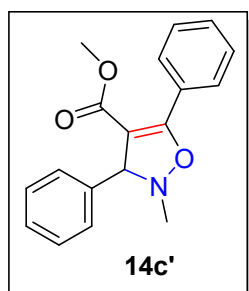

Colorless oily liquid, Yield: 48%;  $^1H$  NMR (600 MHz, DMSO-*d*<sub>6</sub>)  $\delta$  7.82 – 7.77 (m, 2H), 7.58 – 7.53 (m, 1H), 7.49 (dd,  $J = 8.3, 6.9$  Hz, 2H), 7.41 – 7.33 (m, 4H), 7.33 – 7.26 (m, 1H), 5.19 (s, 1H), 3.51 (s, 3H), 2.96 (s, 3H).  $^{13}C$  NMR (151 MHz, DMSO-*d*<sub>6</sub>)  $\delta$  163.56 , 161.24 , 131.26 , 129.50 , 128.32 , 128.05 , 127.64 , 127.08 , 102.74 , 75.16 , 50.99 . HRMS(ESI)  $C_{18}H_{17}NO_3$   $[M+H]^+$   $m/z$ : Calc 296.1282, Measured 296.1282

**Diethyl 2-benzyl-3-phenyl-2,3-dihydroisoxazole-4,5-dicarboxylate (15c)**

**(15c)**

Colorless oily liquid, Chloroform-*d*)  $\delta$  7.41 – 7.25 (m, 2H), 5.24 (s, 7.2 Hz, 2H), 4.18 – 1.17 (t,  $J = 7.1$  Hz, 162.28 , 159.31 , 128.56 , 128.17 , 62.86 , 60.77 , 14.04 , 14.03 . HRMS(ESI)  $C_{18}H_{15}Cl_2NO_3$   $[M+H]^+$   $m/z$ : Calc 382.1610, Measured 382.1639

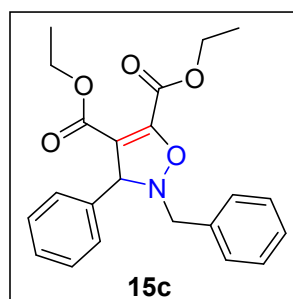

Yield: 84%;  $^1H$  NMR (600 MHz, Chloroform-*d*)  $\delta$  7.36 (m, 2H), 7.36 – 7.29 (m, 6H), 7.29 – 1H), 4.46 (d,  $J = 13.0$  Hz, 1H), 4.38 (q,  $J = 4.04$  (m, 3H), 1.39 (d,  $J = 14.3$  Hz, 3H), 3H).  $^{13}C$  NMR (151 MHz, Chloroform-*d*)  $\delta$  152.09 , 139.74 , 134.93 , 129.58 , 128.59 , 128.07 , 127.47 , 109.15 , 72.88 , 63.58 ,

**Diethyl 6,6-dimethyl-3a,4,5,6-tetrahydropyrrolo[1,2-*b*]isoxazole-2,3-dicarboxylate (16c)**

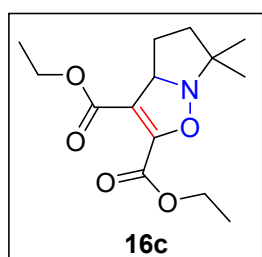

Yellow oily liquid, Yield: 66%;  $^1H$  NMR (600 MHz,  $CDCl_3$ )  $\delta$  4.82 (dd,  $J = 8.1, 3.2$  Hz, 1H), 4.26 (q,  $J = 7.2$  Hz, 2H), 4.16 – 4.05 (m, 2H), 2.13 (ddt,  $J = 13.2, 10.6, 7.9$  Hz, 1H), 1.97 – 1.83 (m, 1H), 1.74 – 1.60 (m, 2H), 1.30 (s, 3H), 1.28 (t,  $J = 7.2$  Hz, 3H), 1.19 (t,  $J = 7.2$  Hz, 3H), 1.04 (s, 3H).  $^{13}C$  NMR (151 MHz,  $CDCl_3$ )  $\delta$  161.37, 158.26, 151.18, 108.14, 69.53,

68.67, 61.51, 59.43, 33.60, 31.21, 25.14, 22.13, 13.13, 12.91.

HRMS(ESI)  $C_{14}H_{21}NO_5$   $[M+H]^+$   $m/z$ : Calc 284.1493, Measured 284.1489

#### Diethyl 2-methyl-3-phenyl-2,3-dihydroisoxazole-4,5-dicarboxylate (17c)

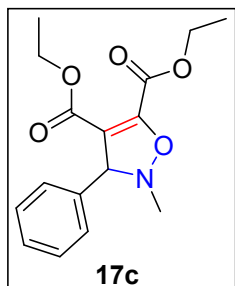

Colorless oily liquid, Yield: 72%;  $^1H$  NMR (600 MHz, DMSO- $d_6$ )  $\delta$  7.40 – 7.34 (m, 2H), 7.31 (tt,  $J$  = 6.4, 1.3 Hz, 3H), 5.19 (s, 1H), 4.33 (q,  $J$  = 7.1 Hz, 2H), 4.09 – 3.96 (m, 2H), 2.93 (s, 3H), 1.29 (t,  $J$  = 7.1 Hz, 3H), 1.08 (t,  $J$  = 7.1 Hz, 3H).  $^{13}C$  NMR (151 MHz, DMSO- $d_6$ )  $\delta$  161.56, 158.98, 151.05, 128.44, 128.04, 127.05, 108.23, 74.09, 62.79, 60.38, 46.99, 30.00, 13.75, 13.71. HRMS(ESI)  $C_{16}H_{19}NO_5$   $[M+H]^+$   $m/z$ : Calc 306.1336, Measured 306.1339

#### Ethyl 2-methyl-3-phenyl-4-(trifluoromethyl)-2,3-dihydroisoxazole-5-carboxylate (18c)

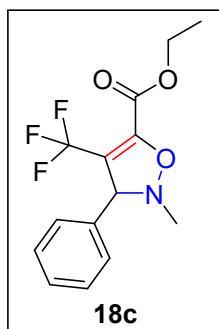

Colorless oily liquid, Yield: 94%;  $^1H$  NMR (600 MHz, DMSO- $d_6$ )  $\delta$  7.38 (tt,  $J$  = 7.0, 1.1 Hz, 2H), 7.33 (tt,  $J$  = 7.9, 1.4 Hz, 3H), 5.34 (q,  $J$  = 2.1 Hz, 1H), 4.13 – 4.02 (m, 2H), 2.96 (s, 3H), 1.09 (t,  $J$  = 7.1 Hz, 3H).  $^{13}C$  NMR (151 MHz, DMSO- $d_6$ )  $\delta$  160.26, 128.54, 128.32, 127.18, 118.75, 116.94, 110.32 (q,  $J_{C-F}$  = 3.0 Hz), 75.36, 65.00, 60.89, 46.81, 30.00, 18.64, 13.53. HRMS(ESI)  $C_{14}H_{14}F_3NO_3$   $[M+H]^+$   $m/z$ : Calc 302.0999, Measured 302.0998

## 6. <sup>1</sup>H NMR, <sup>13</sup>C NMR, HRMS Spectra of New Compounds

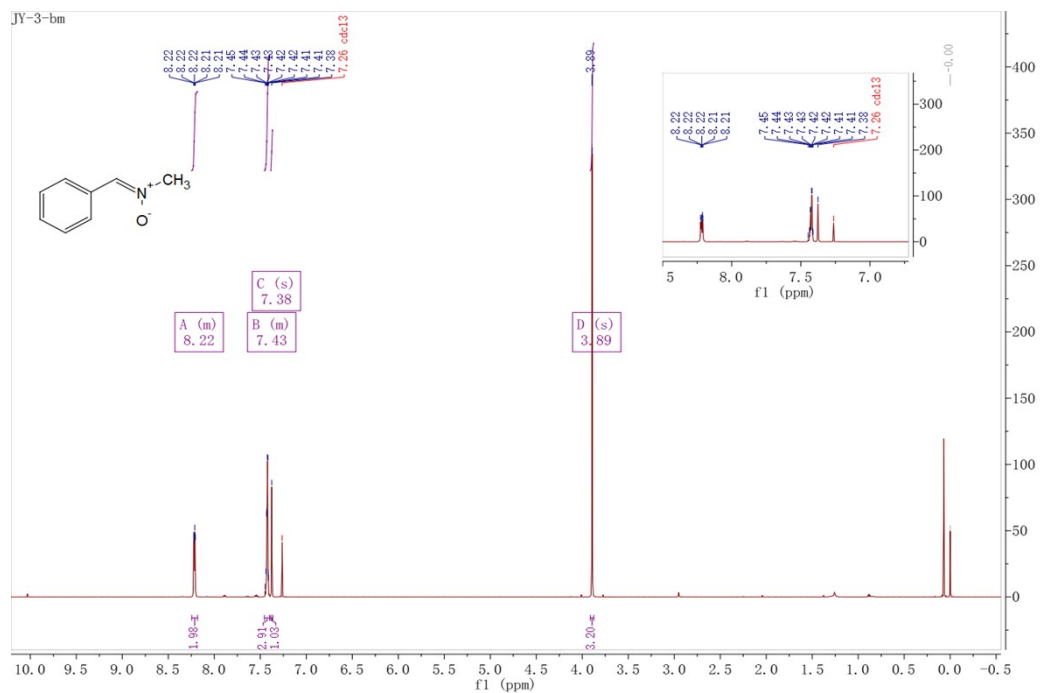

Figure S11 <sup>1</sup>H NMR of 1a

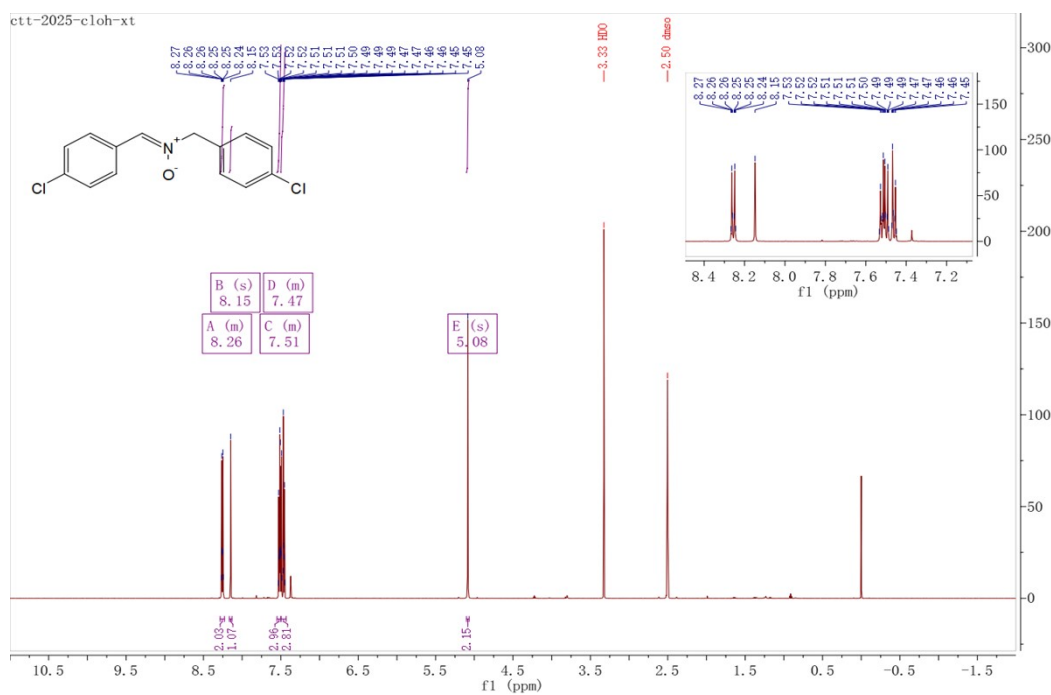

Figure S12 <sup>1</sup>H NMR of 2a

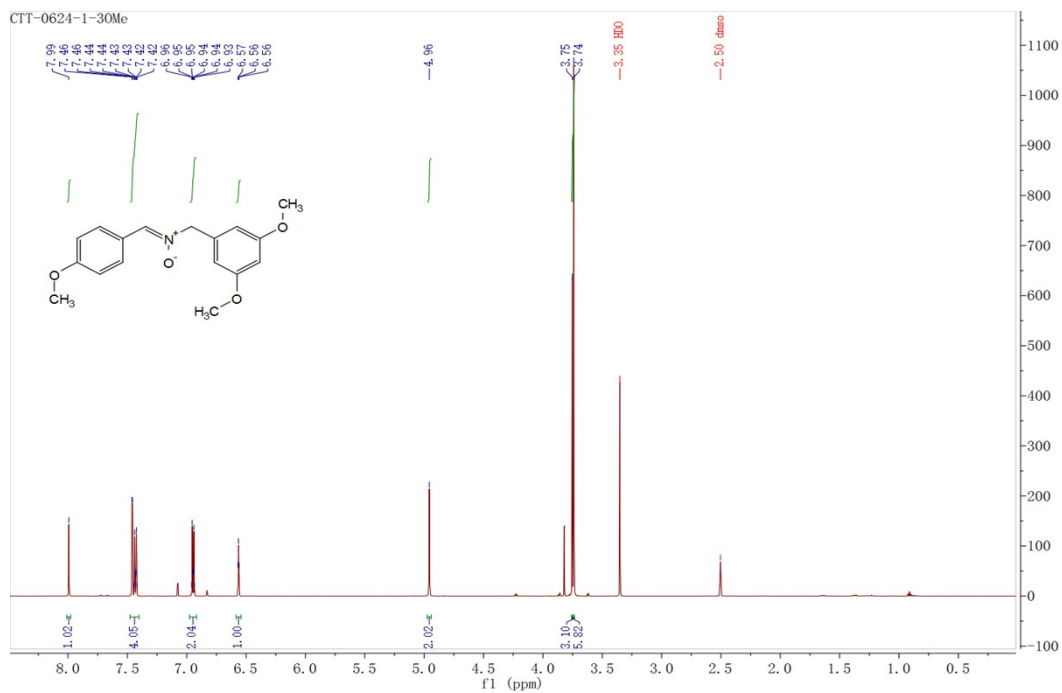

Figure S13 <sup>1</sup>H NMR of 3a

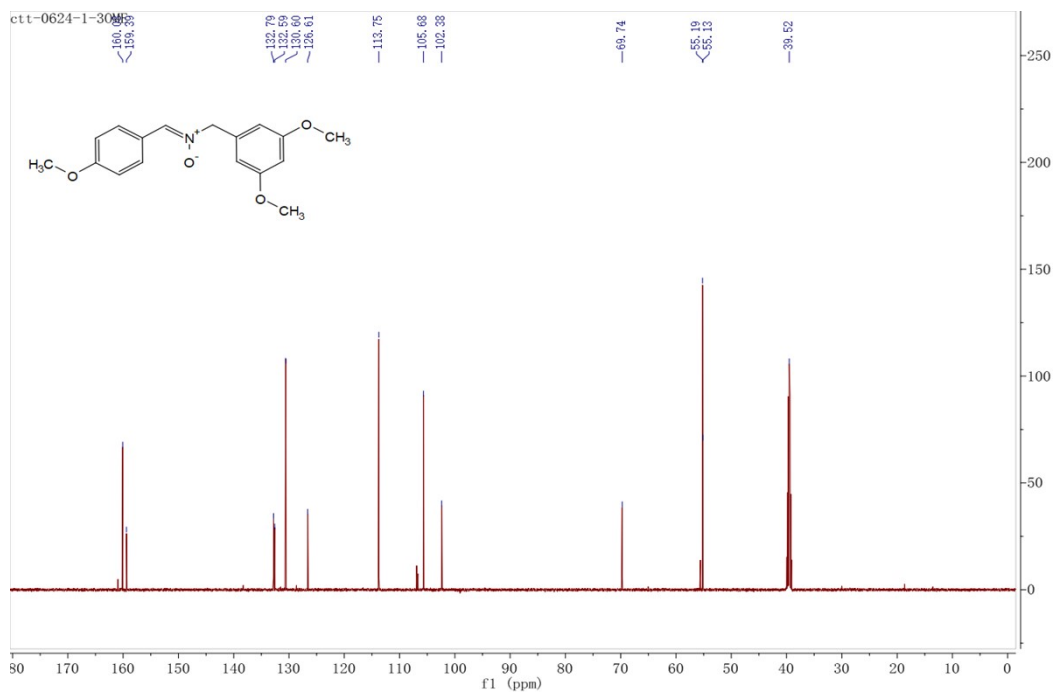

Figure S14 <sup>13</sup>C NMR of 3a

CTT-0624-1-3OMe

pos\_CTT-0624-1-3OMe 458 (2.529) AM (Cen,4, 80.00, Ar,10000.0,0.00,0.00); Cm (458)

I: TOF MS ES+  
6.64e6

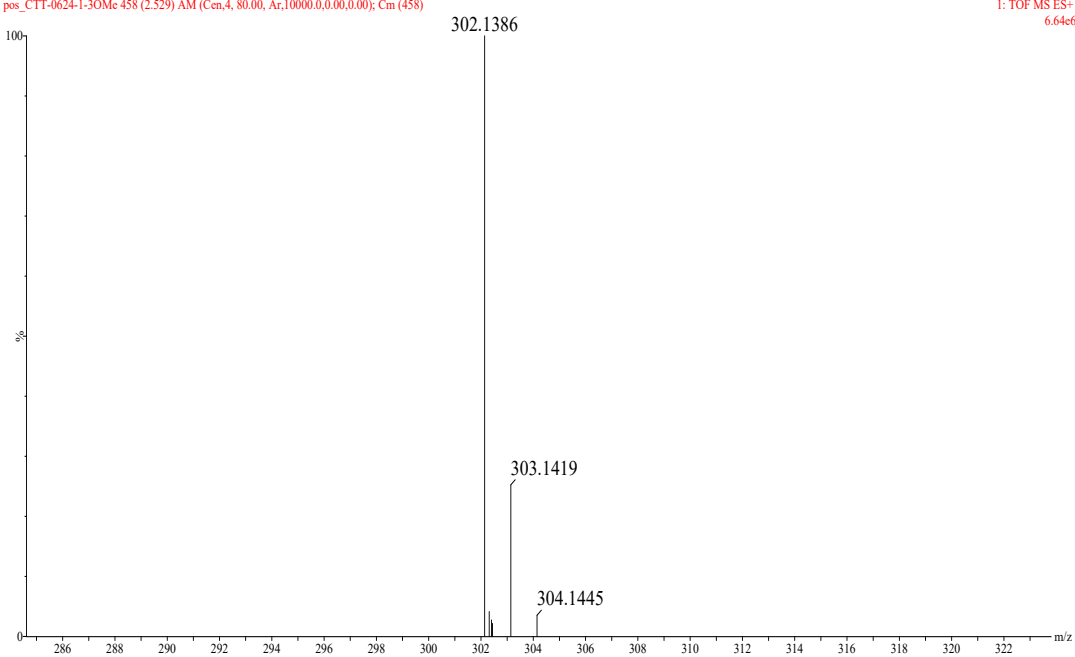

Figure S15 HRMS of 3a

CTT-2025-4\_29-2

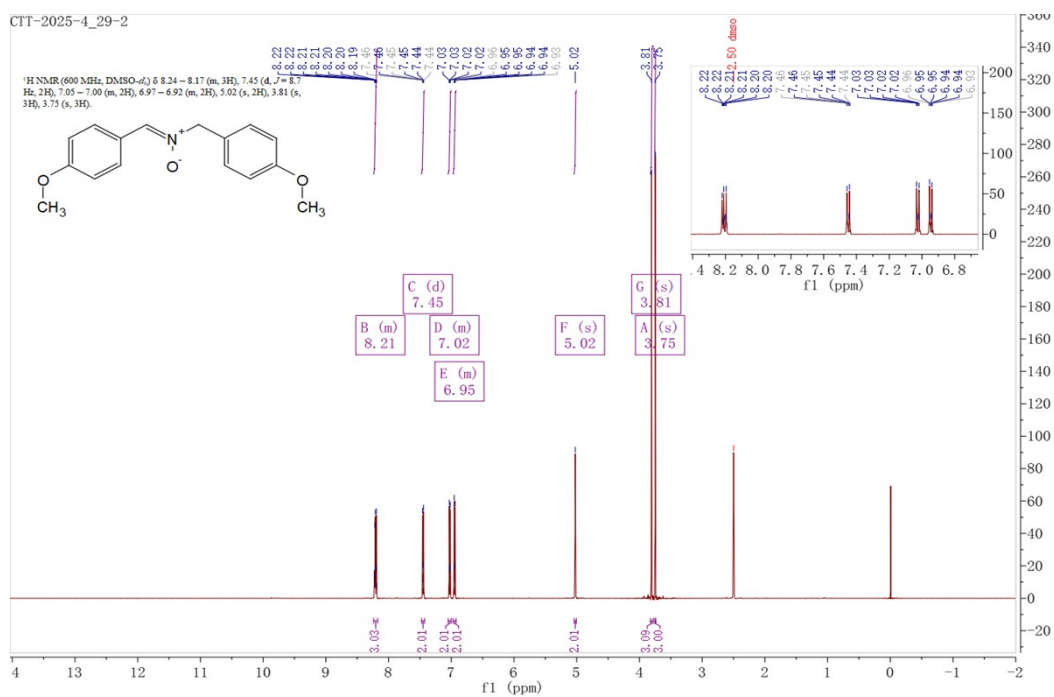

Figure S16 <sup>1</sup>H NMR of 4a

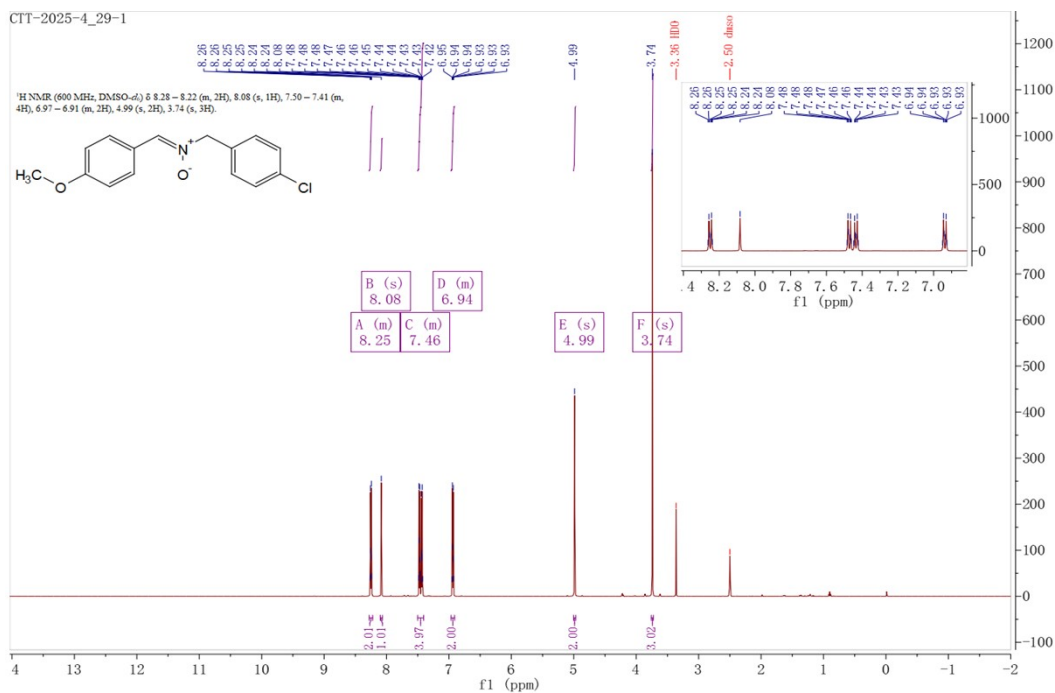

Figure S17 <sup>1</sup>H NMR of 5a

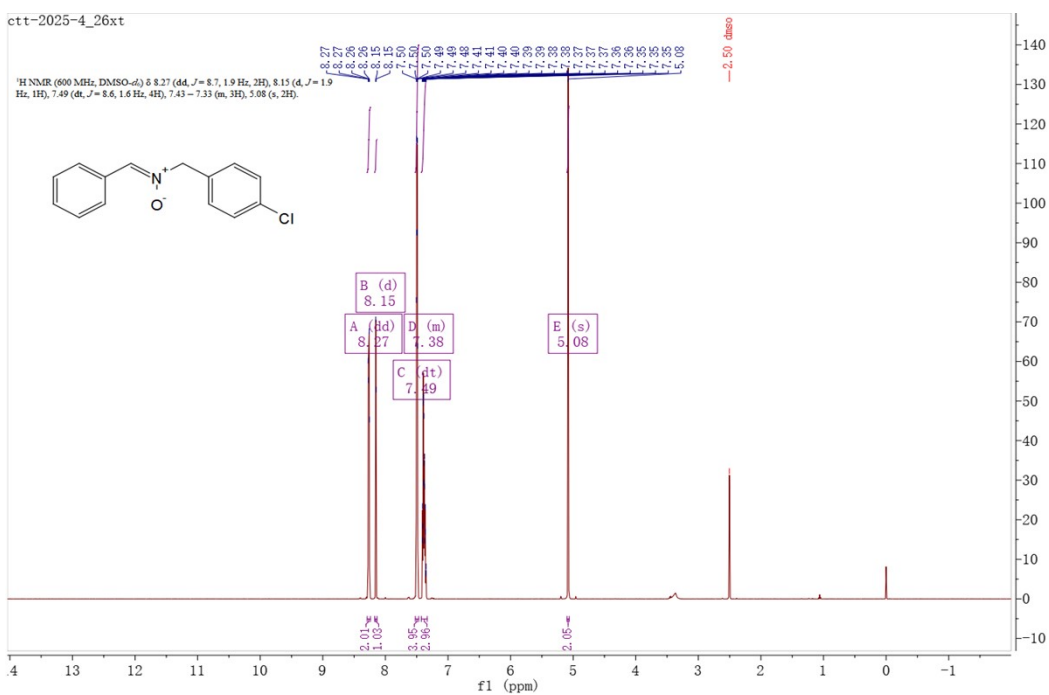

Figure S18 <sup>1</sup>H NMR of 6a



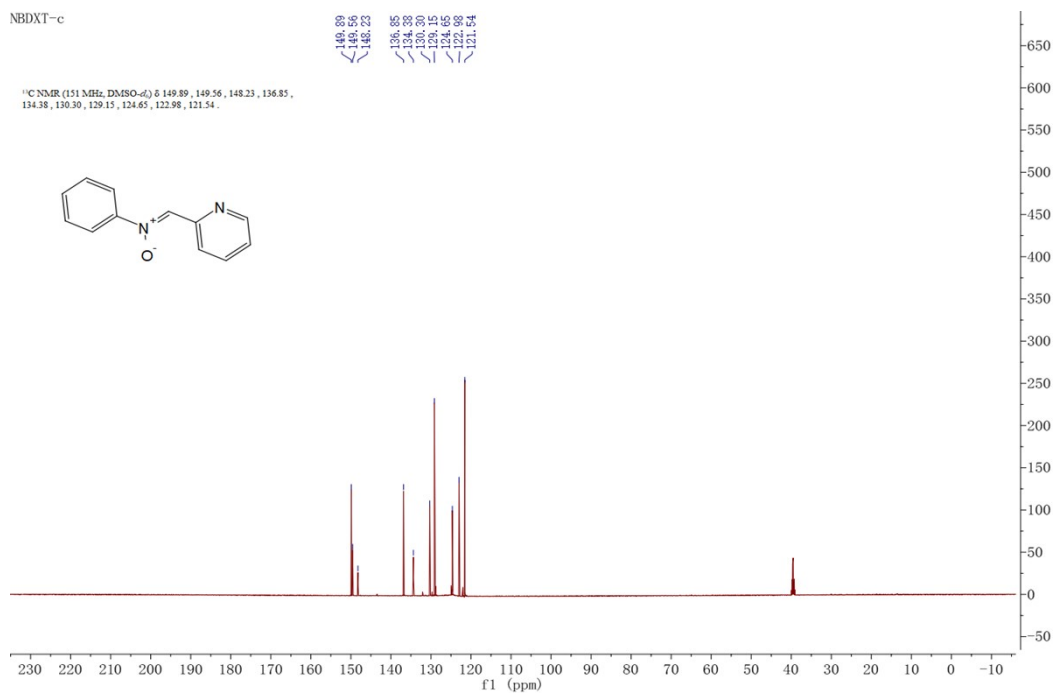

Figure S21 <sup>13</sup>C NMR of **8a**

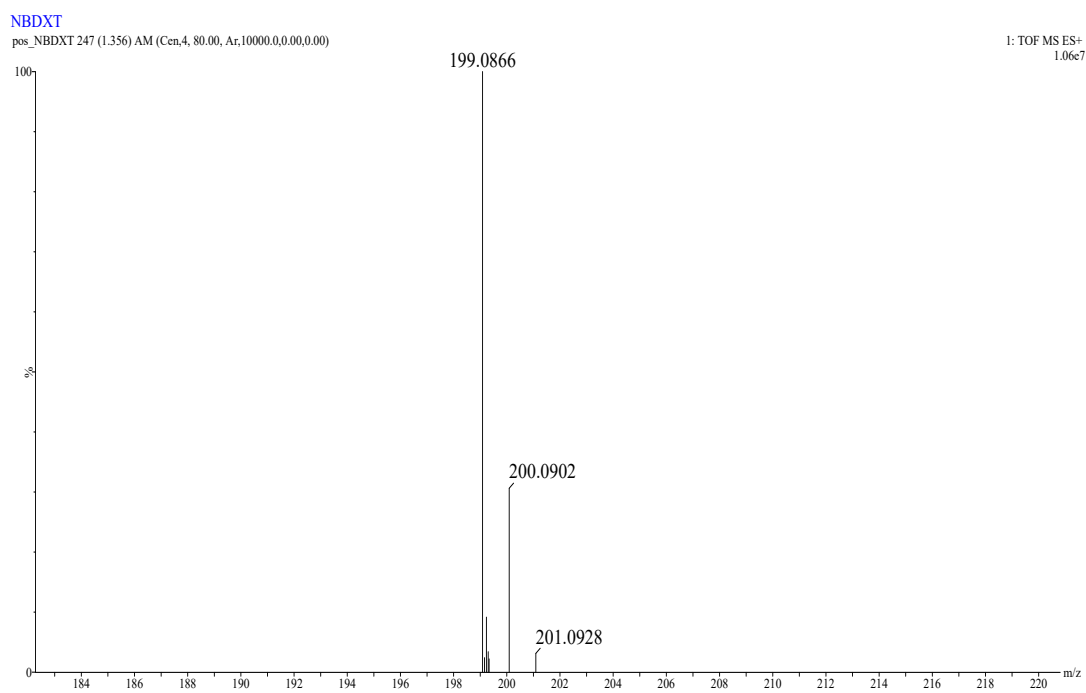

Figure S22 HRMS of **8a**

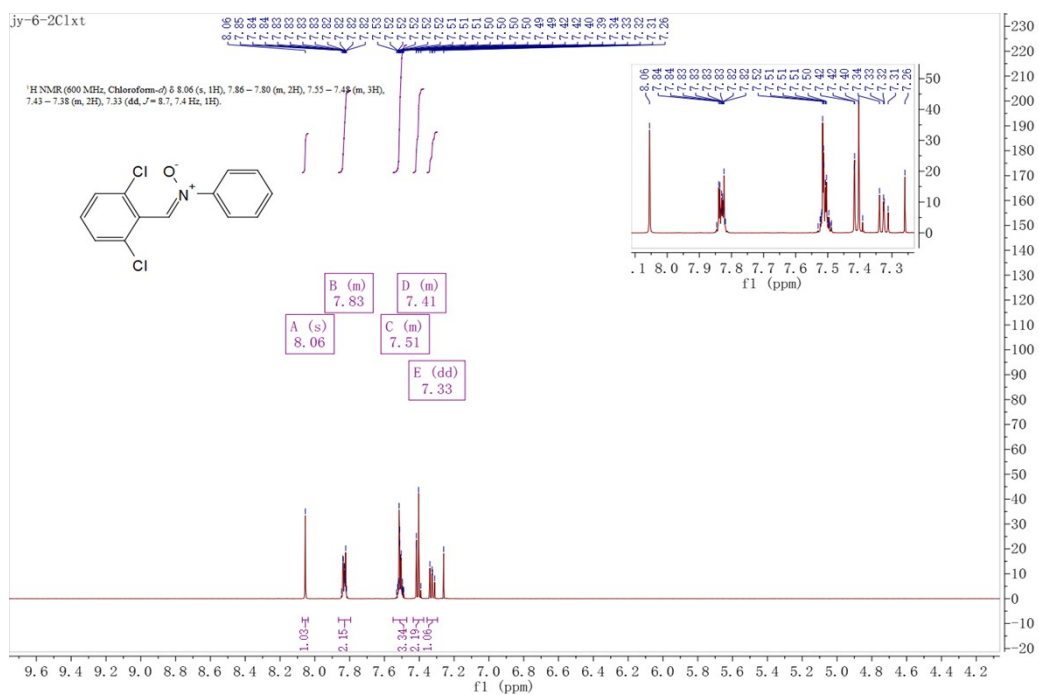

Figure S23 <sup>1</sup>H NMR of 9a

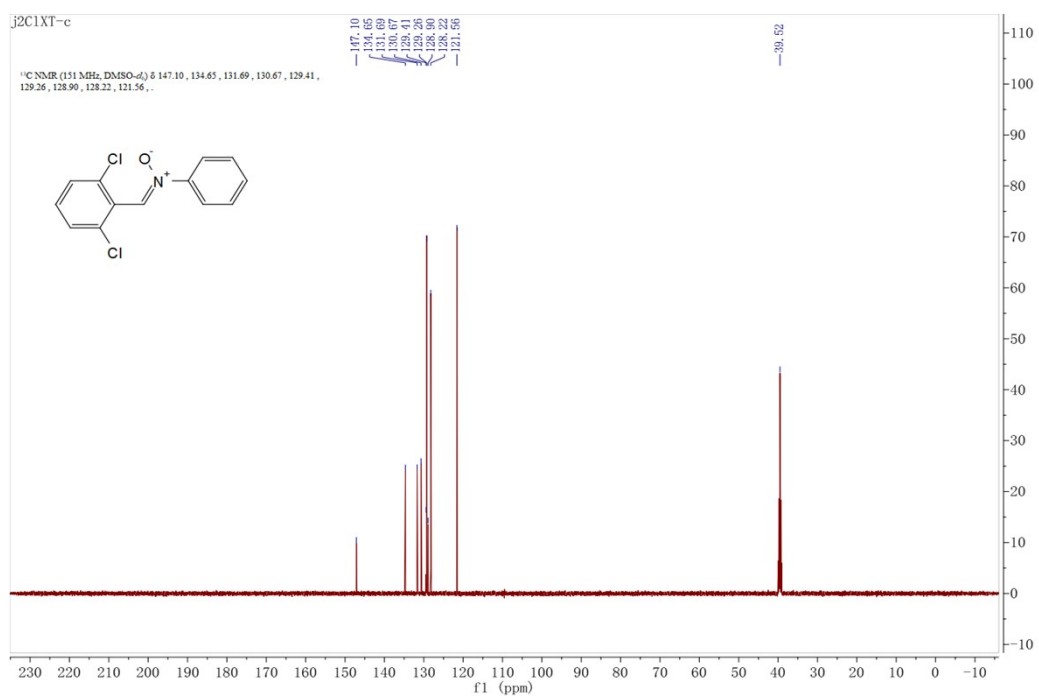

Figure S24 <sup>13</sup>C NMR of 9a



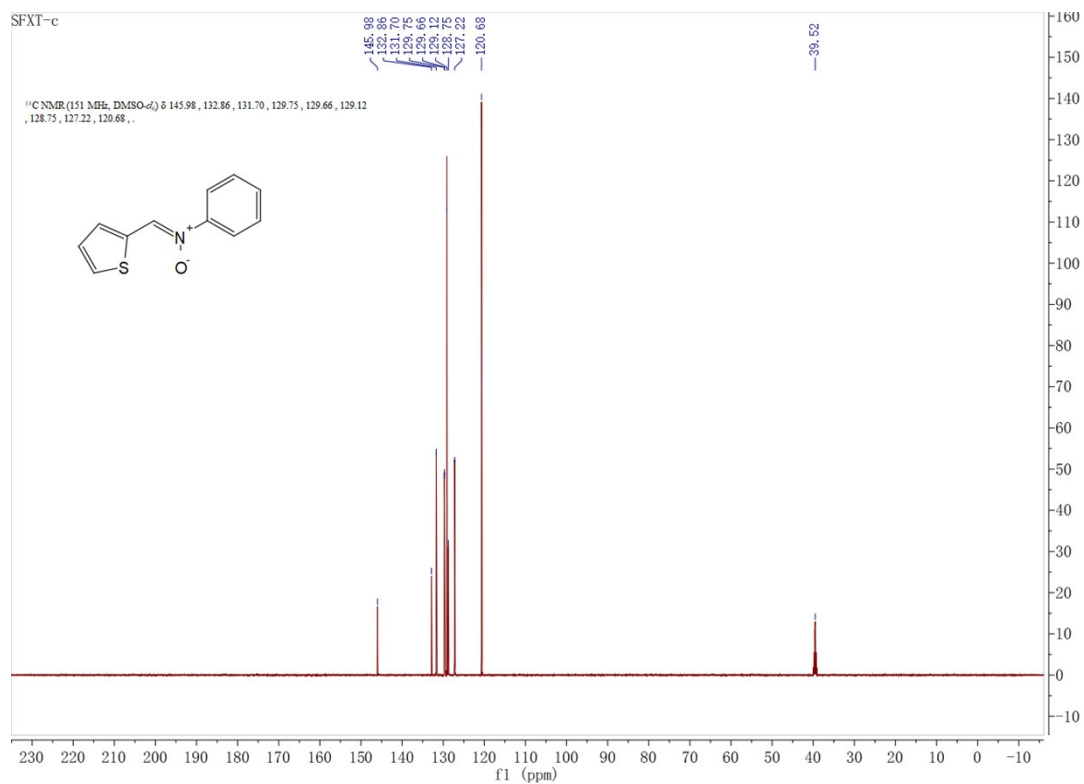

Figure S27 <sup>13</sup>C NMR of 10a

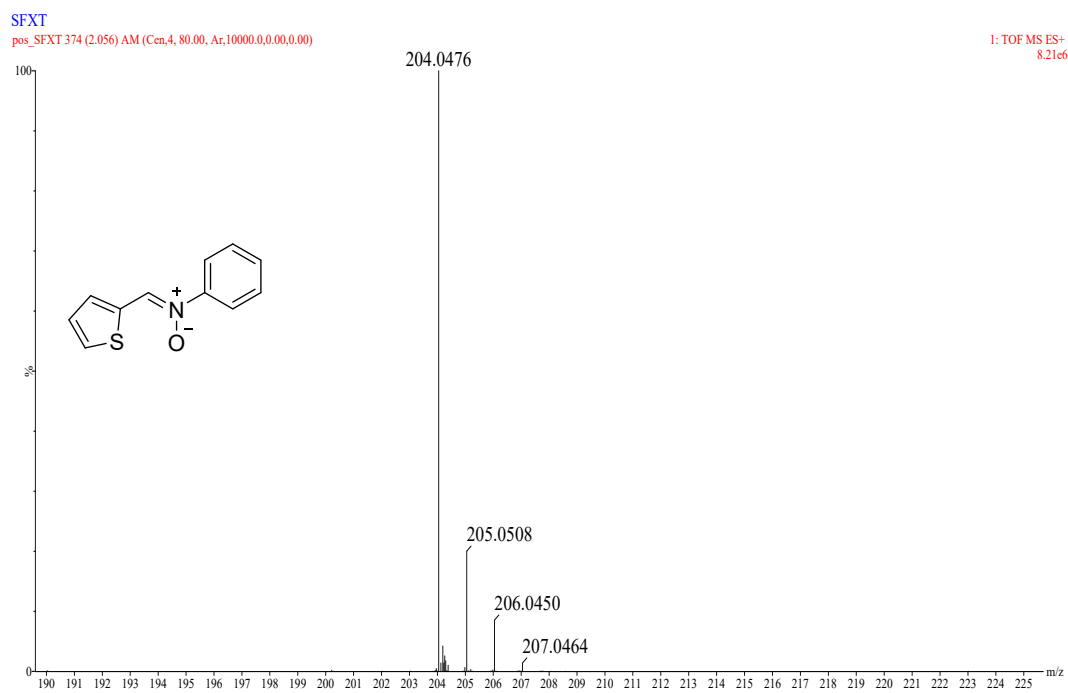

Figure S28 HRMS of 10a

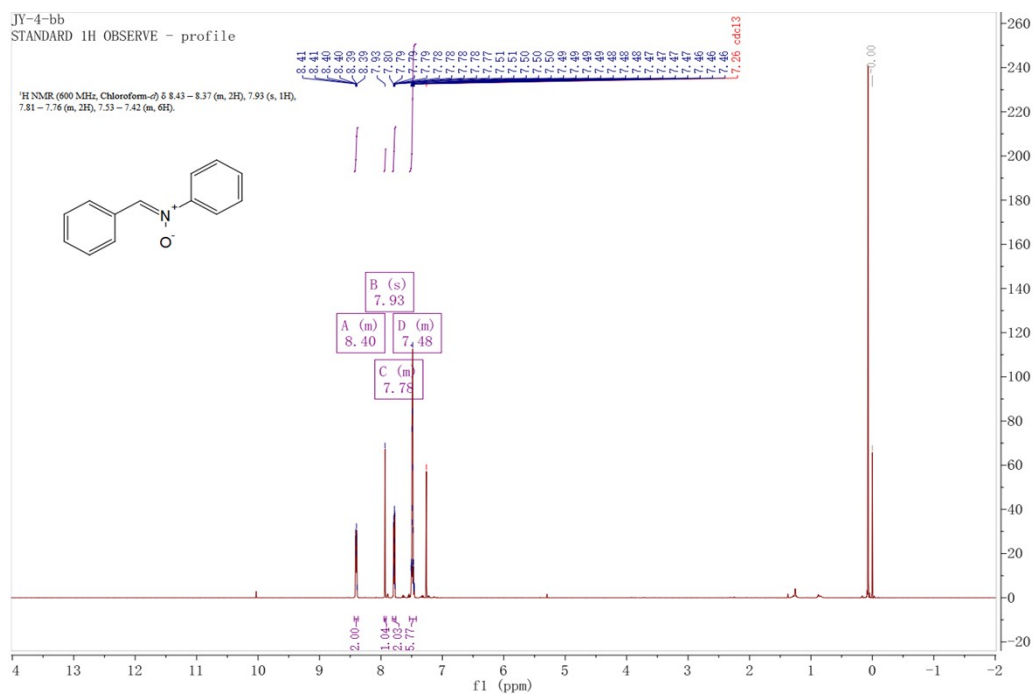

Figure S29 <sup>1</sup>H NMR of 11a

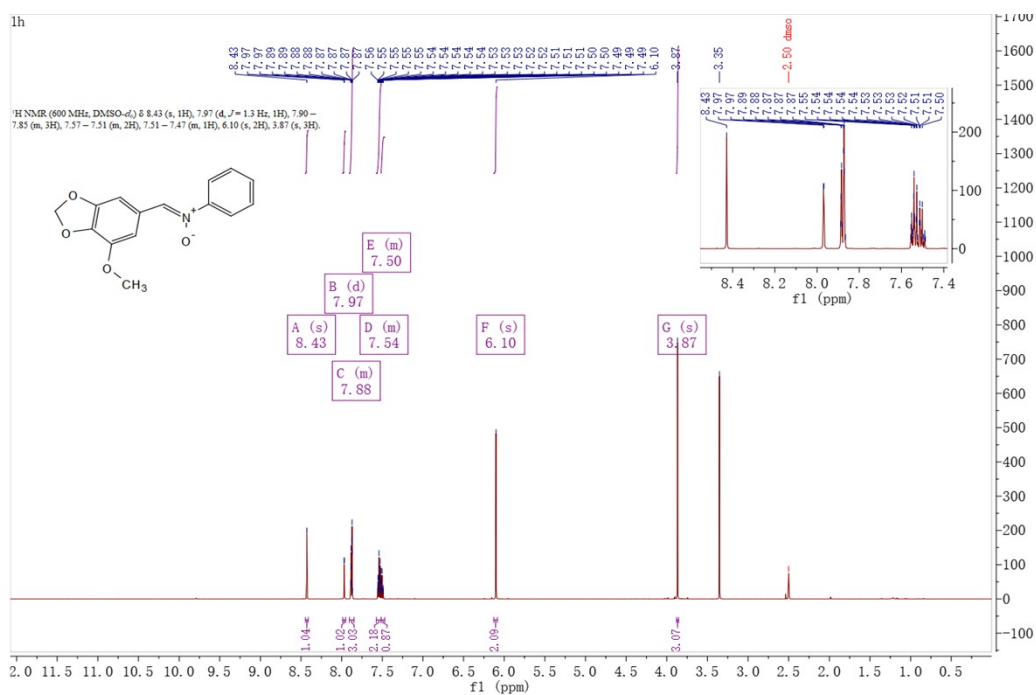

Figure S30 <sup>1</sup>H NMR of 12a

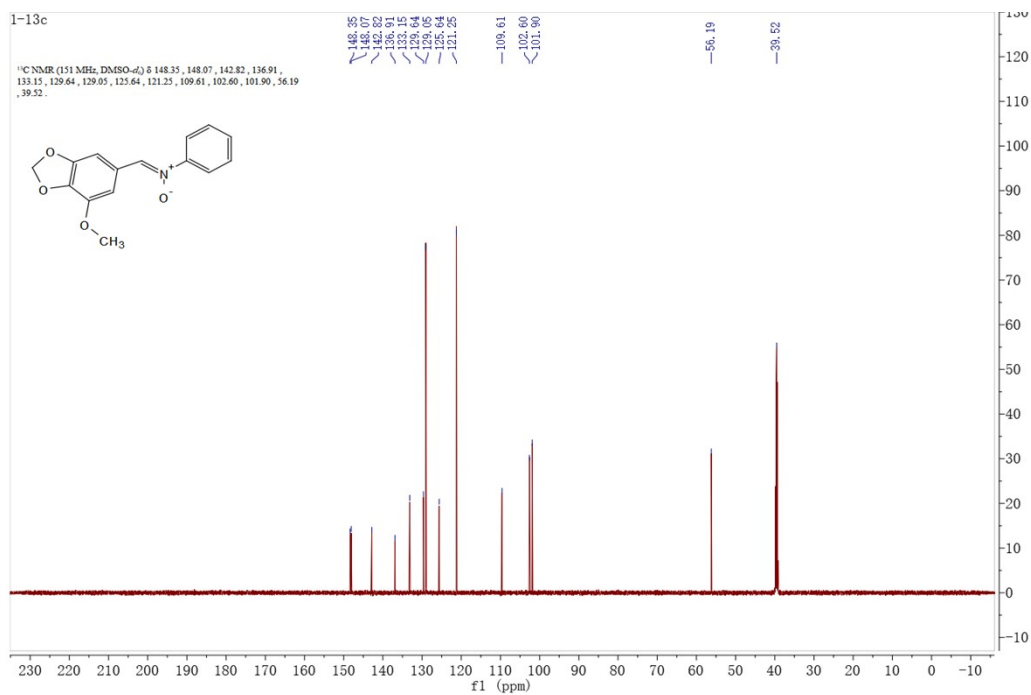

Figure S31 <sup>13</sup>C NMR of **12a**

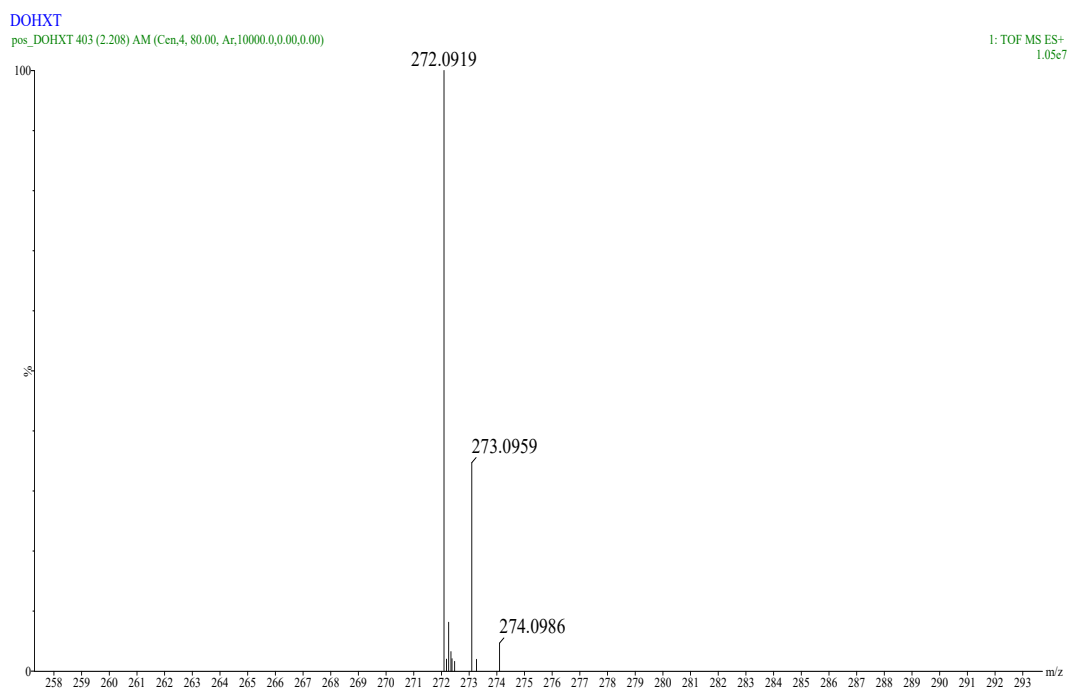

Figure S32 HRMS of **12a**



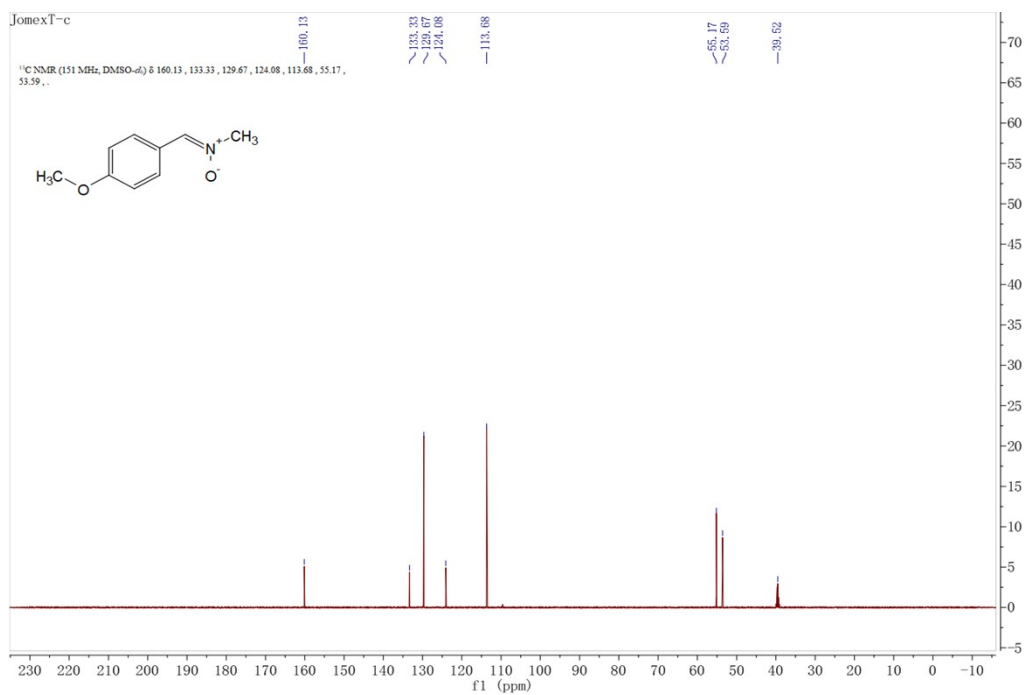

Figure S35 <sup>13</sup>C NMR of **14a**

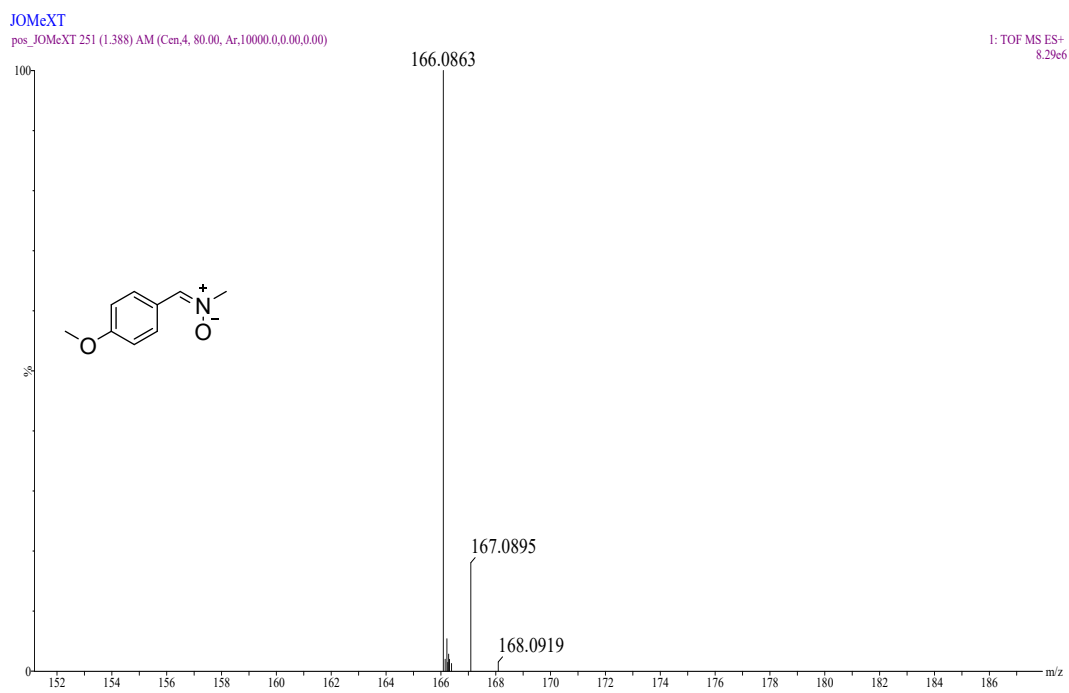

Figure S36 HRMS of **14a**

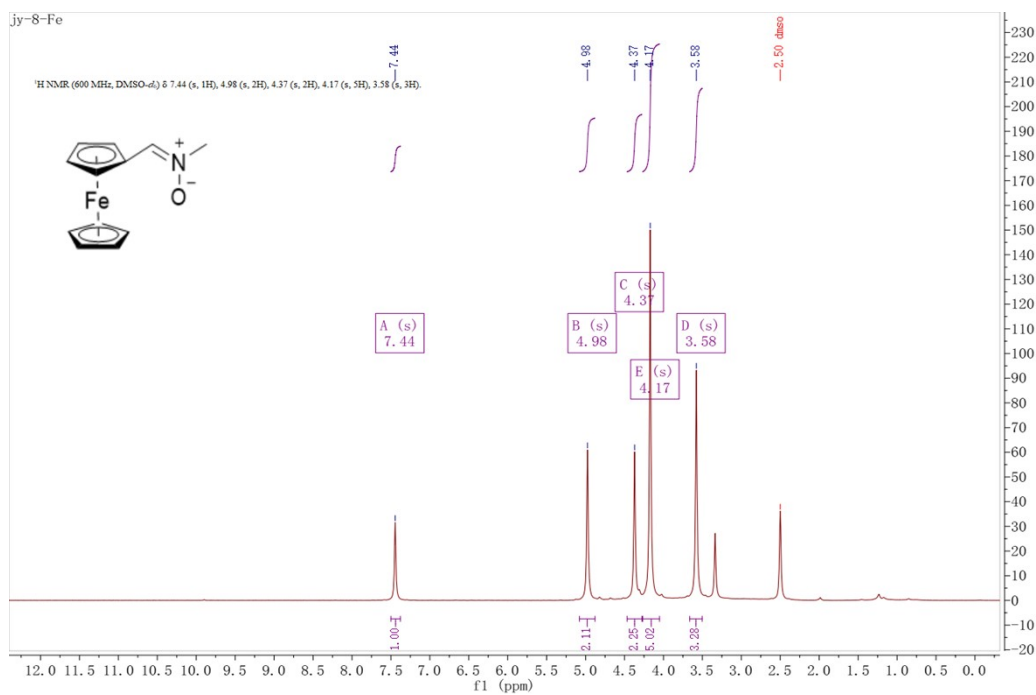

Figure S37  $^1\text{H}$  NMR of **15a**

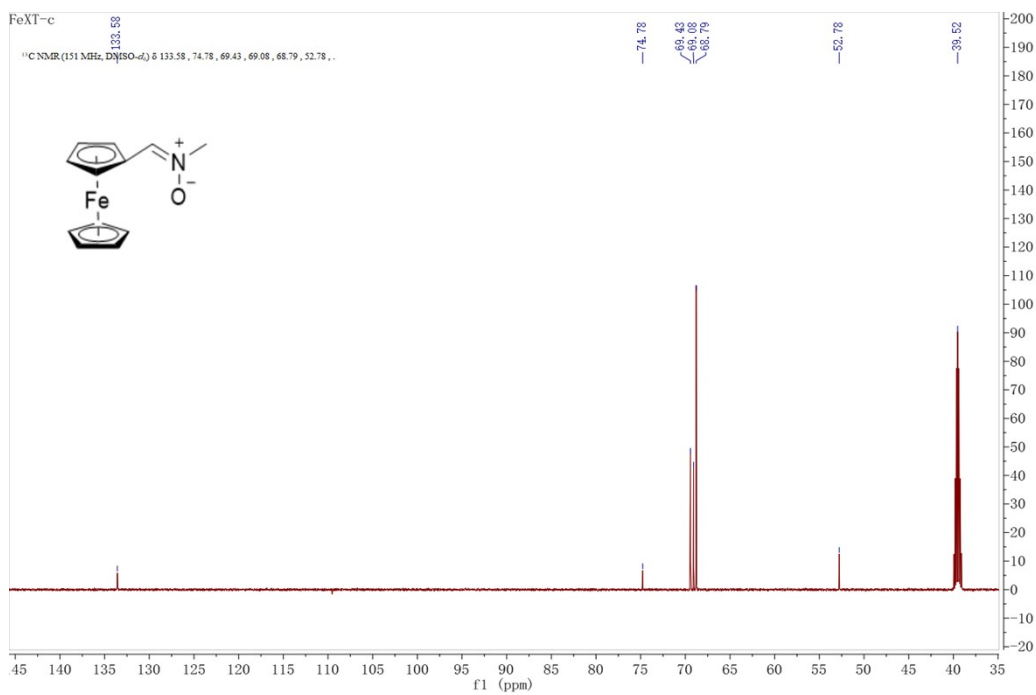

Figure S38  $^{13}\text{C}$  NMR of **15a**

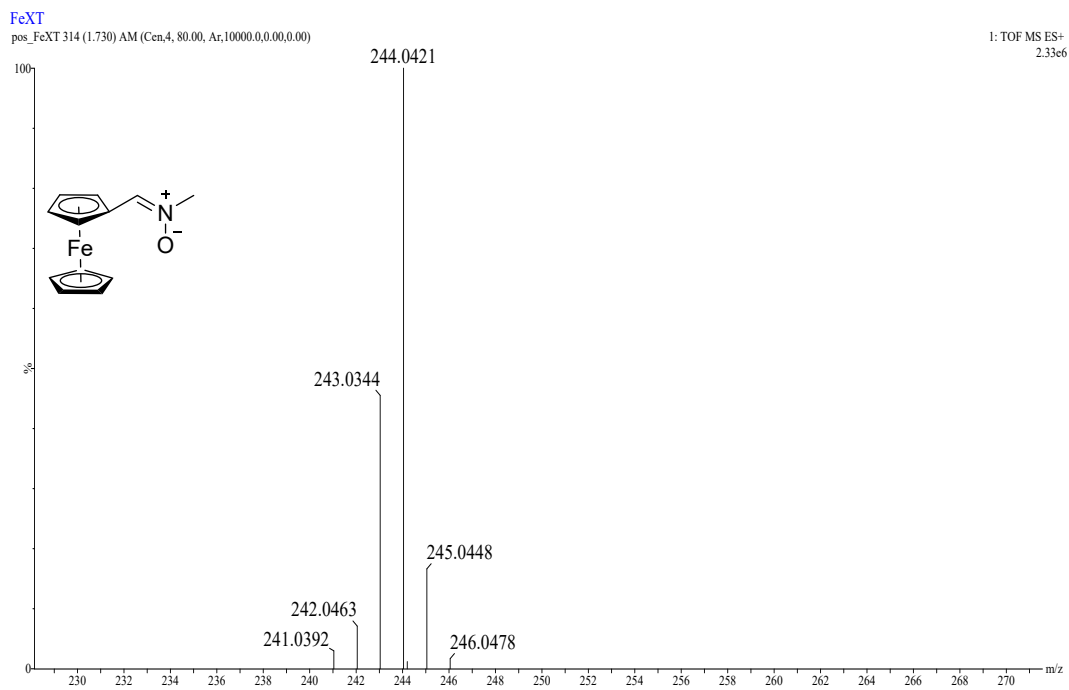

Figure S39 HRMS of **15a**

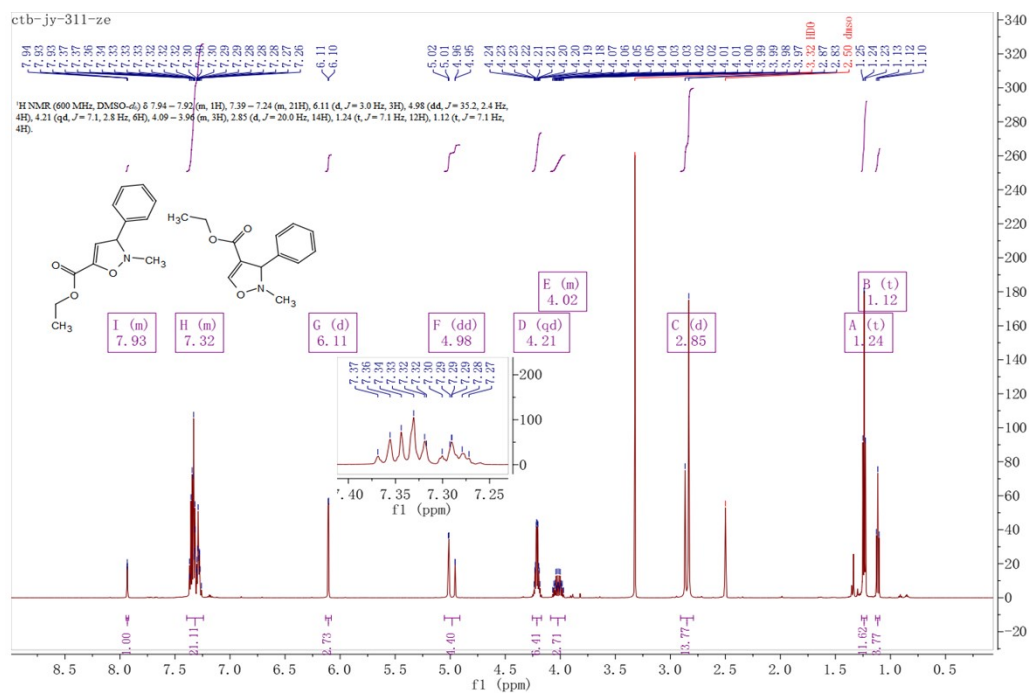

Figure S40 <sup>1</sup>H NMR of **1c** and **1c'**

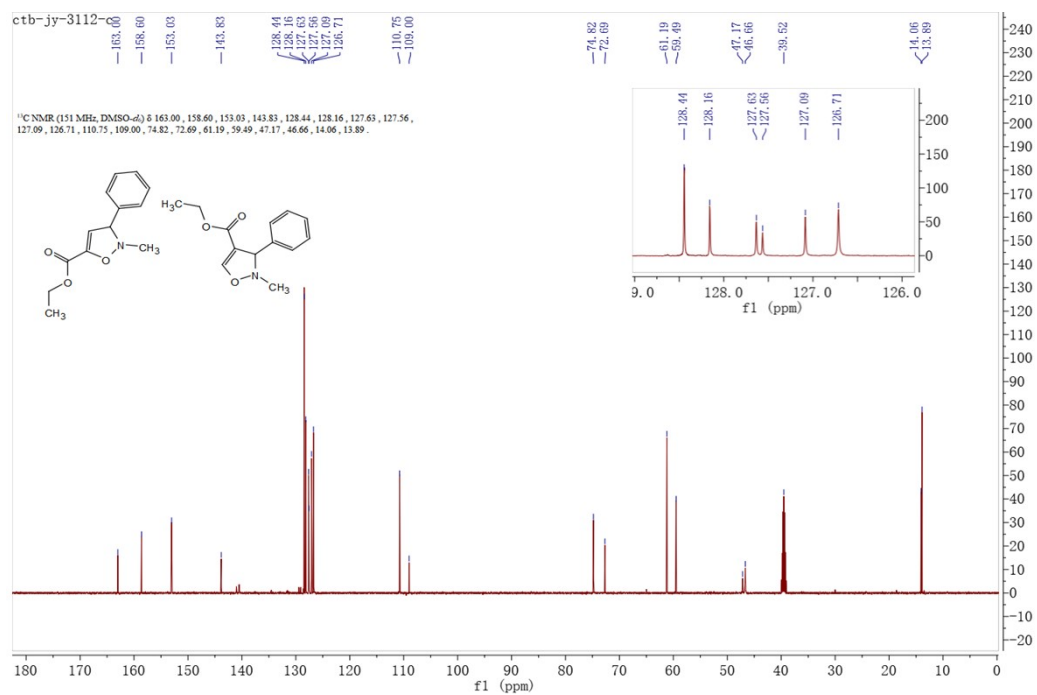

Figure S41 <sup>13</sup>C NMR of **1c** and **1c'**

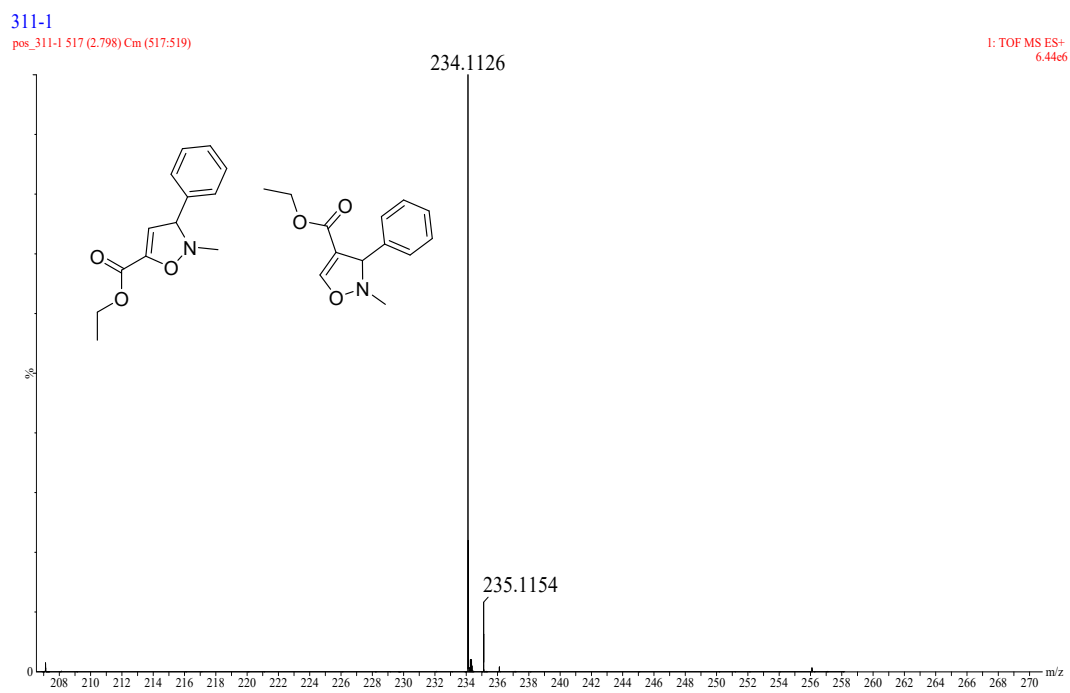

Figure S42 HRMS of **1c** and **1c'**

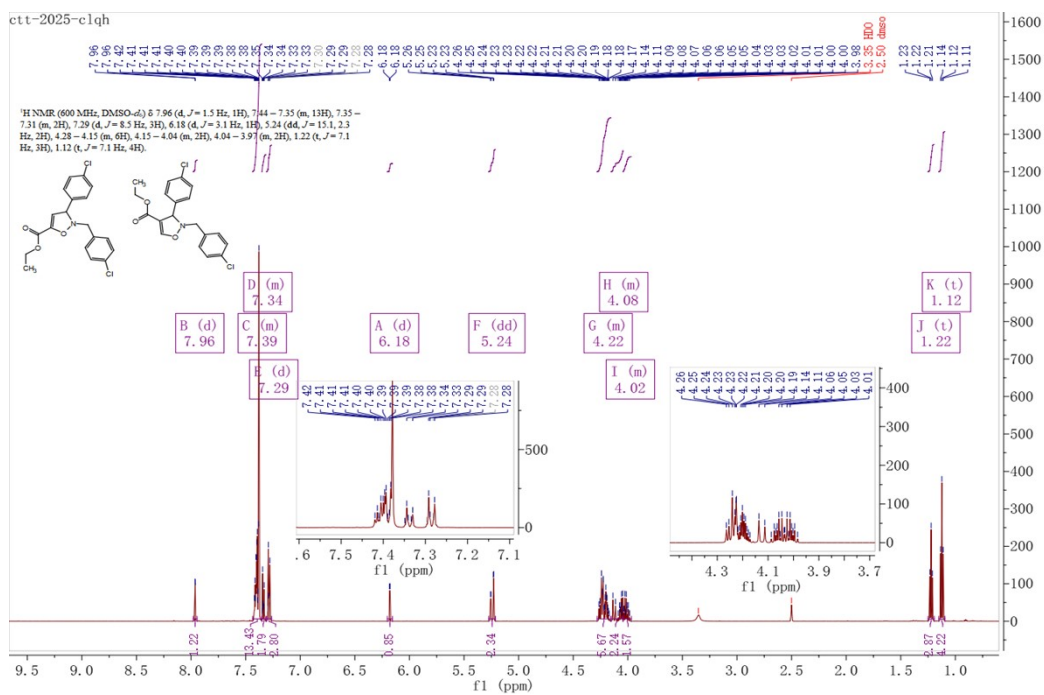

Figure S43 <sup>1</sup>H NMR of **2c** and **2c'**

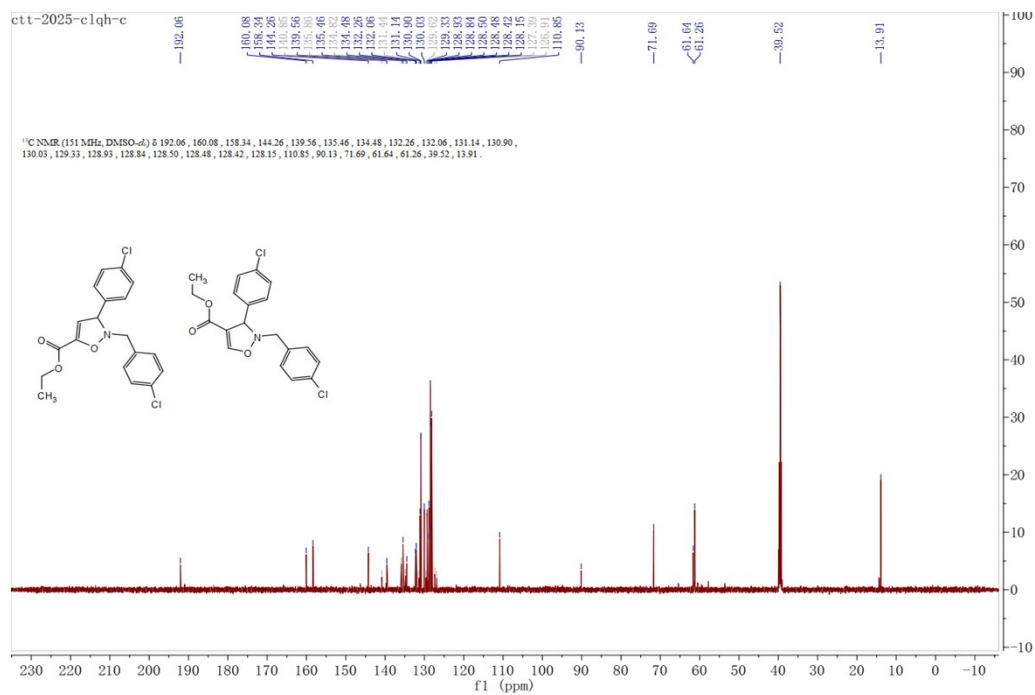

Figure S44 <sup>13</sup>C NMR of **2c** and **2c'**

DCCIQH

pos\_DCCIQH 188 (3.637) AM (Cen.4, 80.00, Ar.10000.0,0.00,0.00); Cm (187:188)

1: TOF MS ES+  
3.28e6

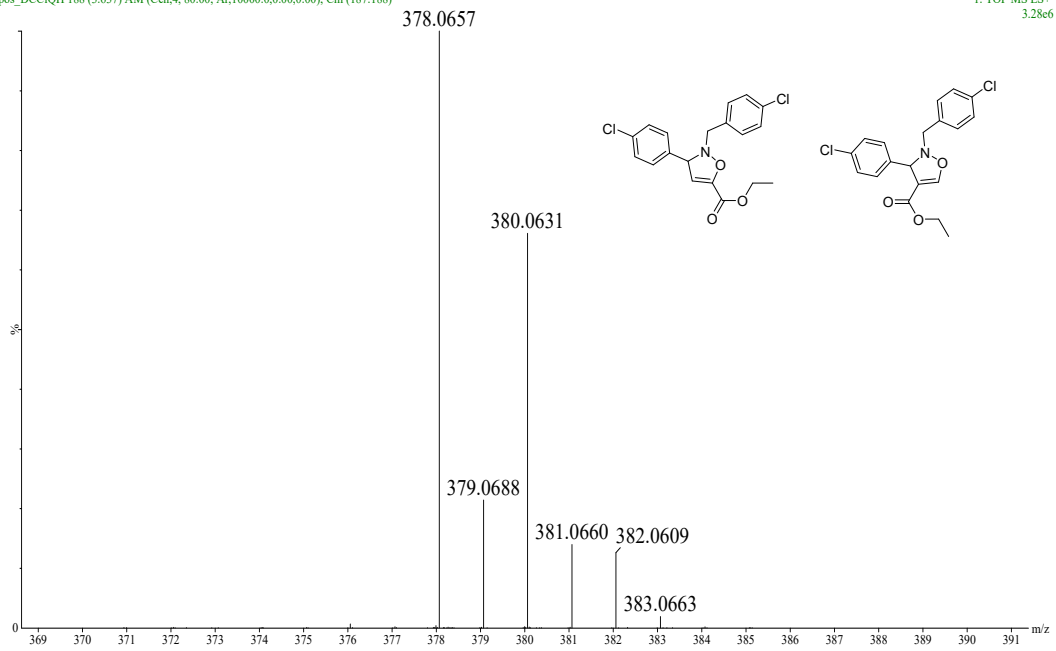

Figure S45 HRMS of 2c and 2c'

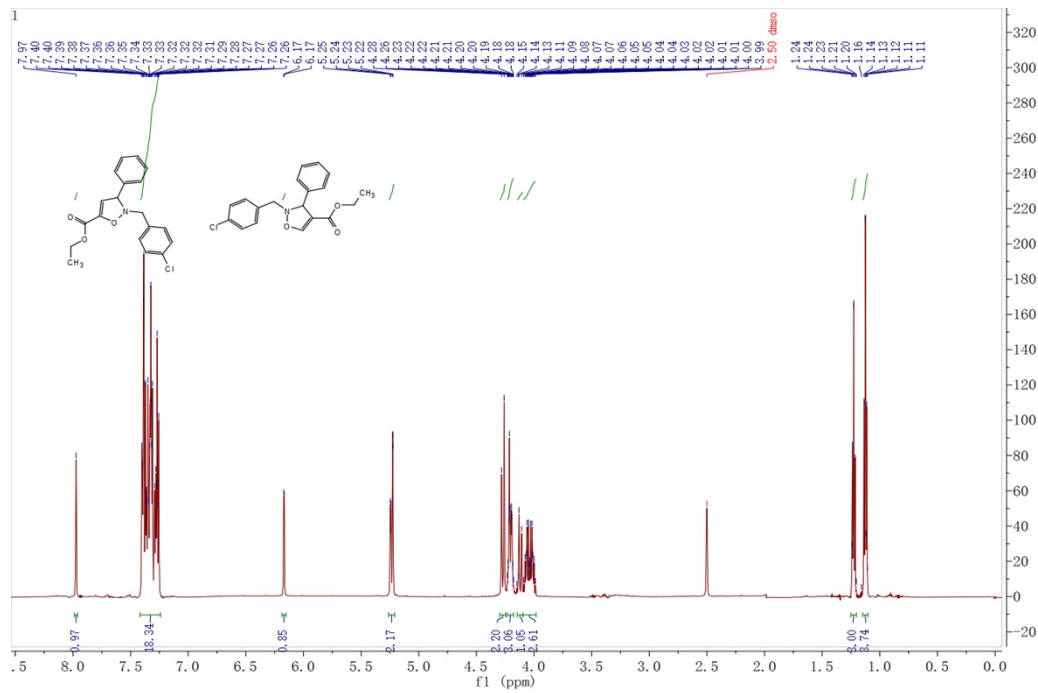

Figure S46 <sup>1</sup>H NMR of 3c and 3c'

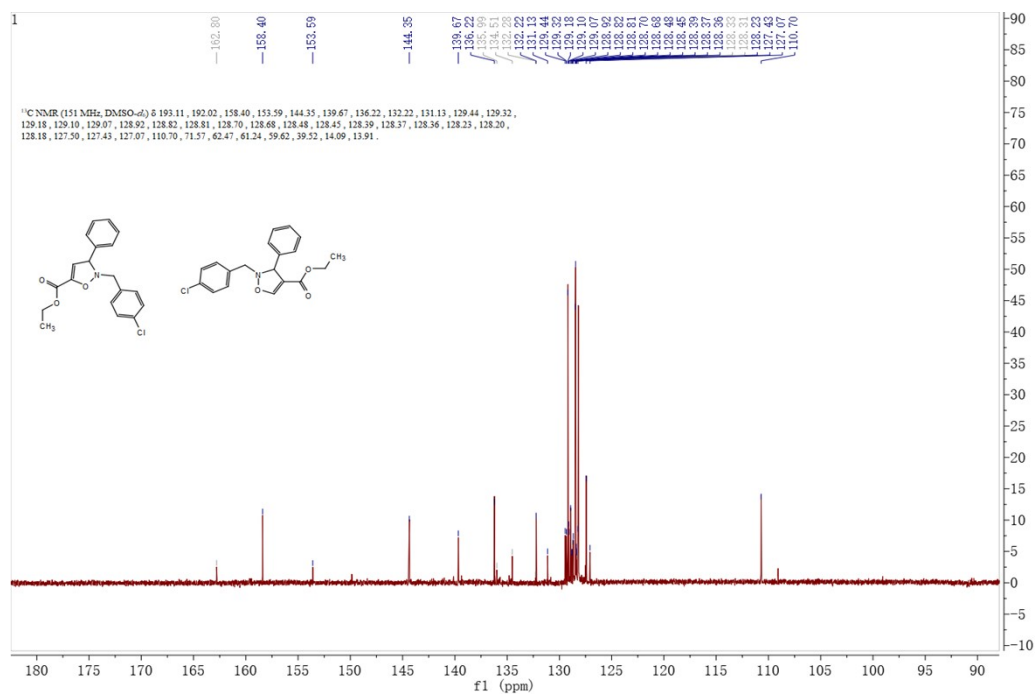

Figure S47 <sup>13</sup>C NMR of **3c** and **3c'**

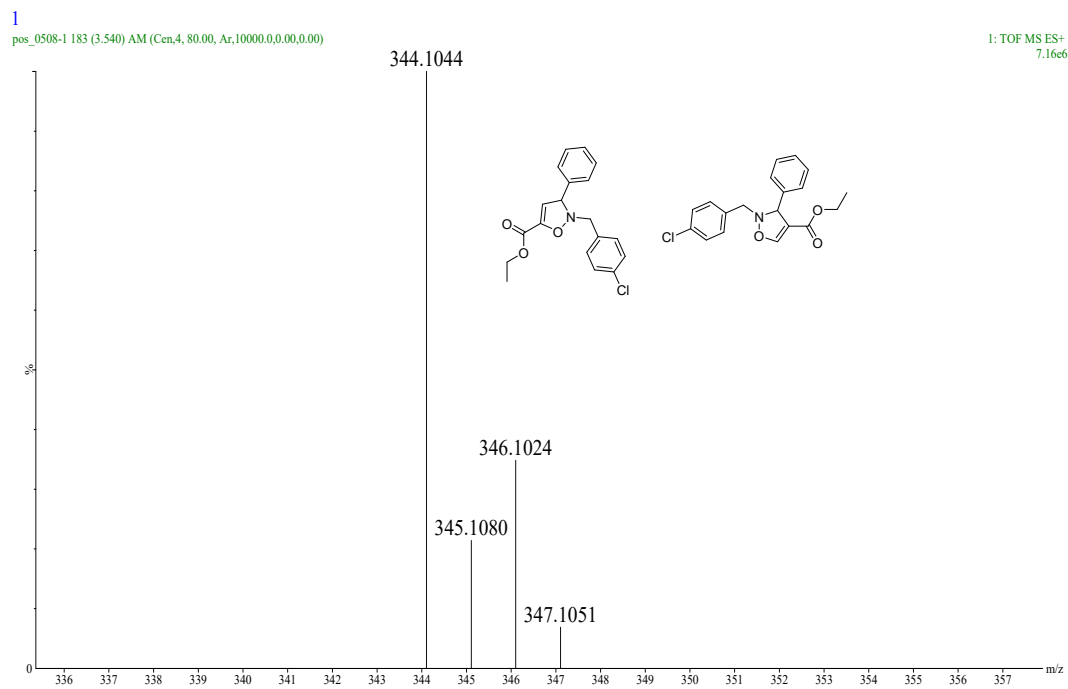

Figure S48 HRMS of **3c** and **3c'**

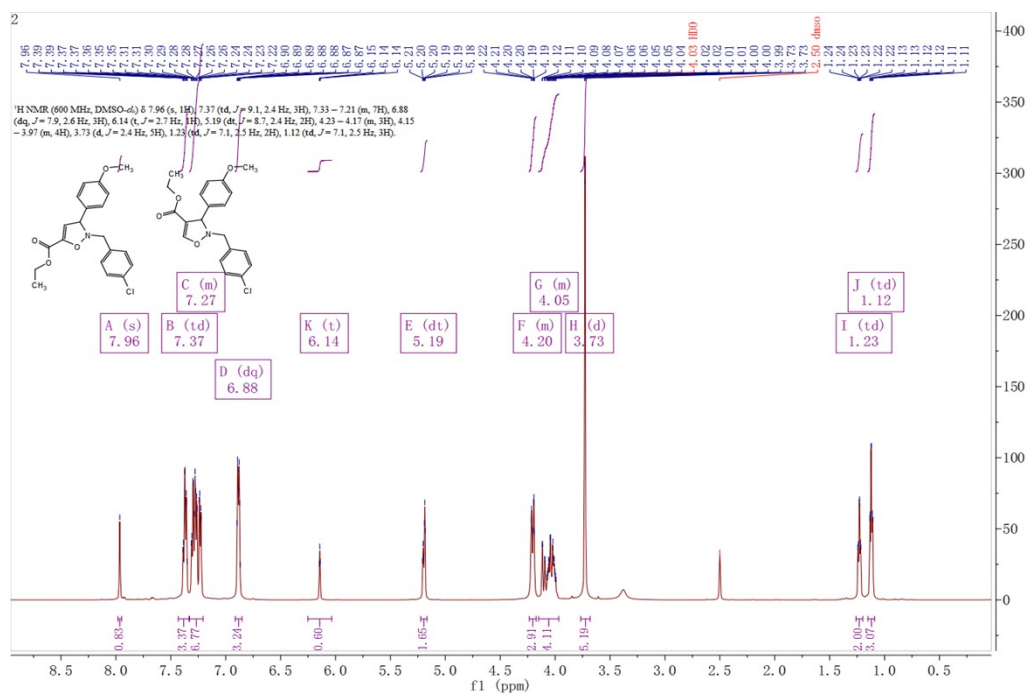

Figure S49 <sup>1</sup>H NMR of 4c and 4c'

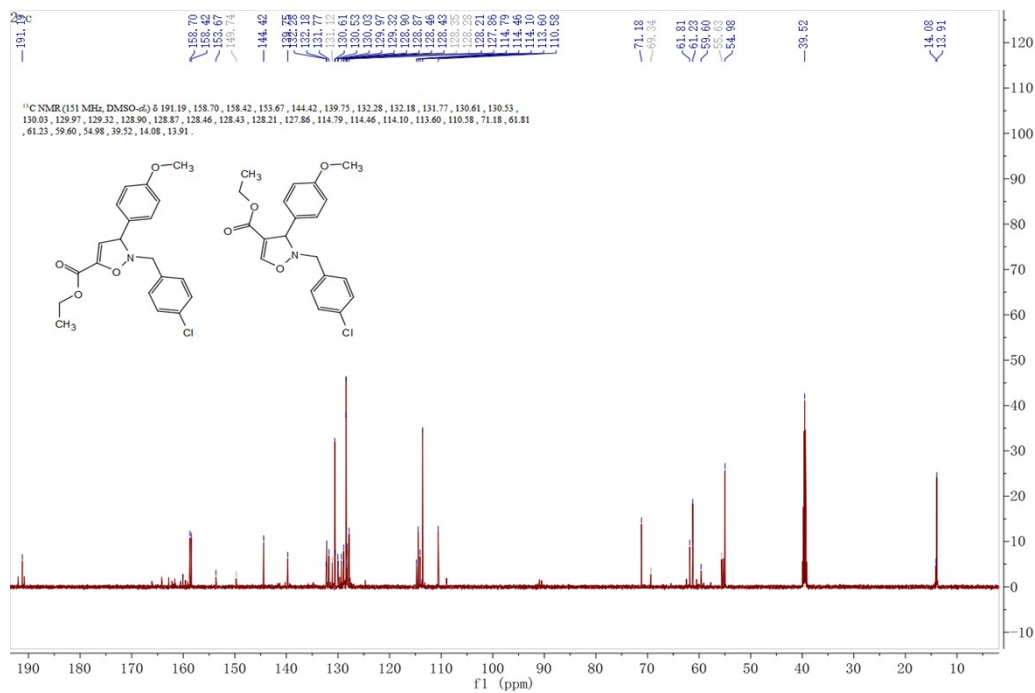

Figure S50 <sup>13</sup>C NMR of 4c and 4c'

2

pos\_0508-2 178 (3.453) Cm (178)

1: TOF MS ES+  
1.32e6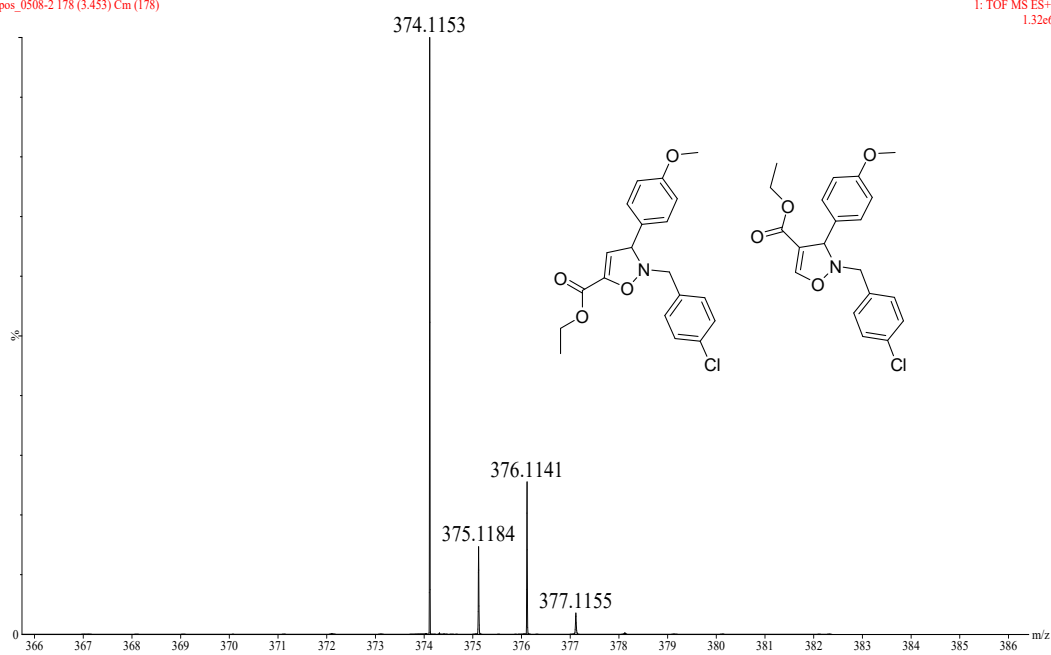

Figure S51 HRMS of 4c and 4c'

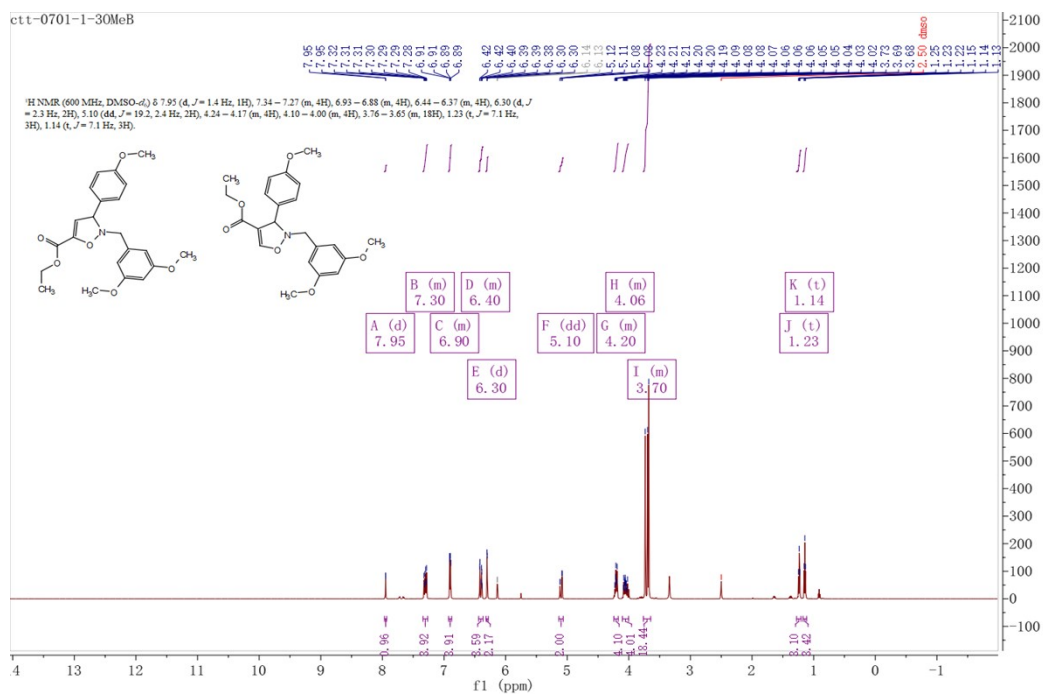Figure S52  $^1\text{H NMR}$  of 5c and 5c'

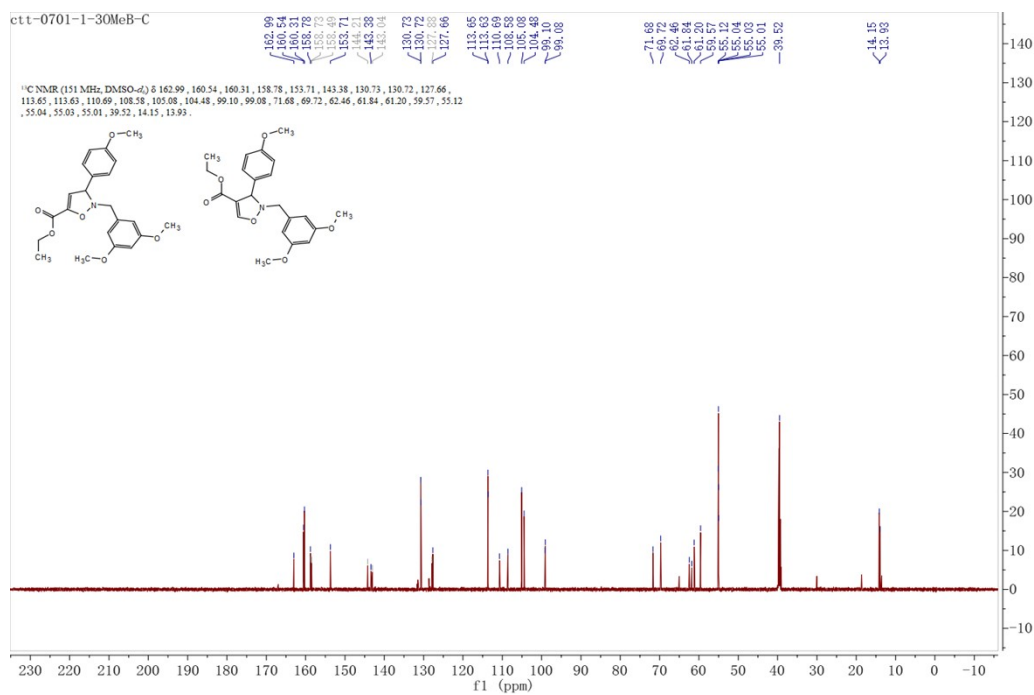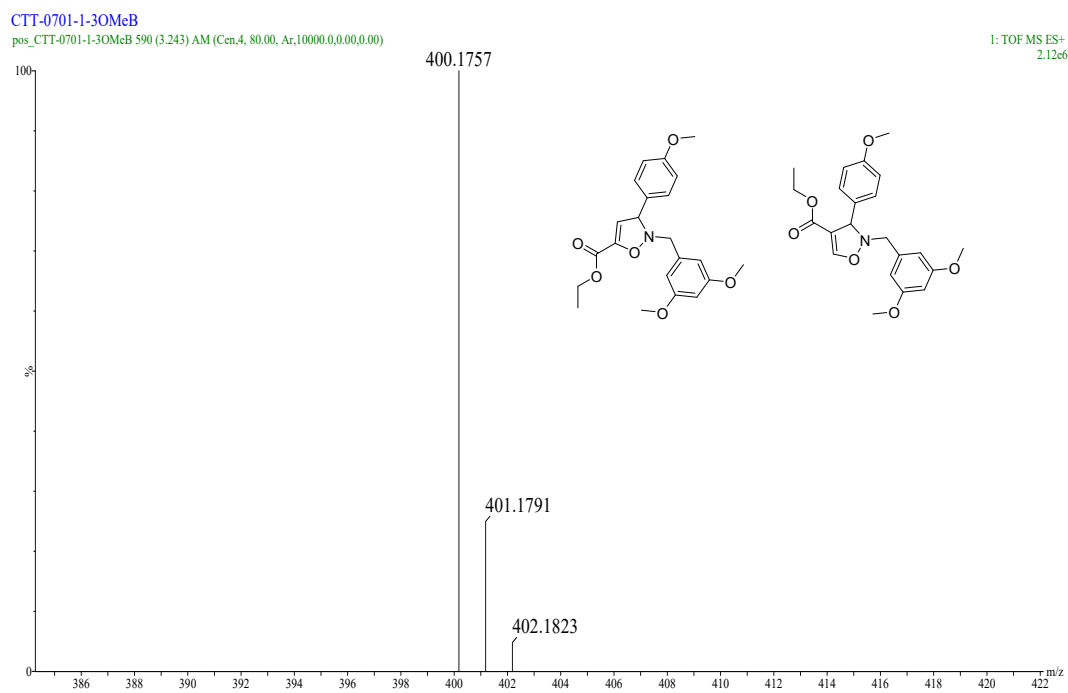

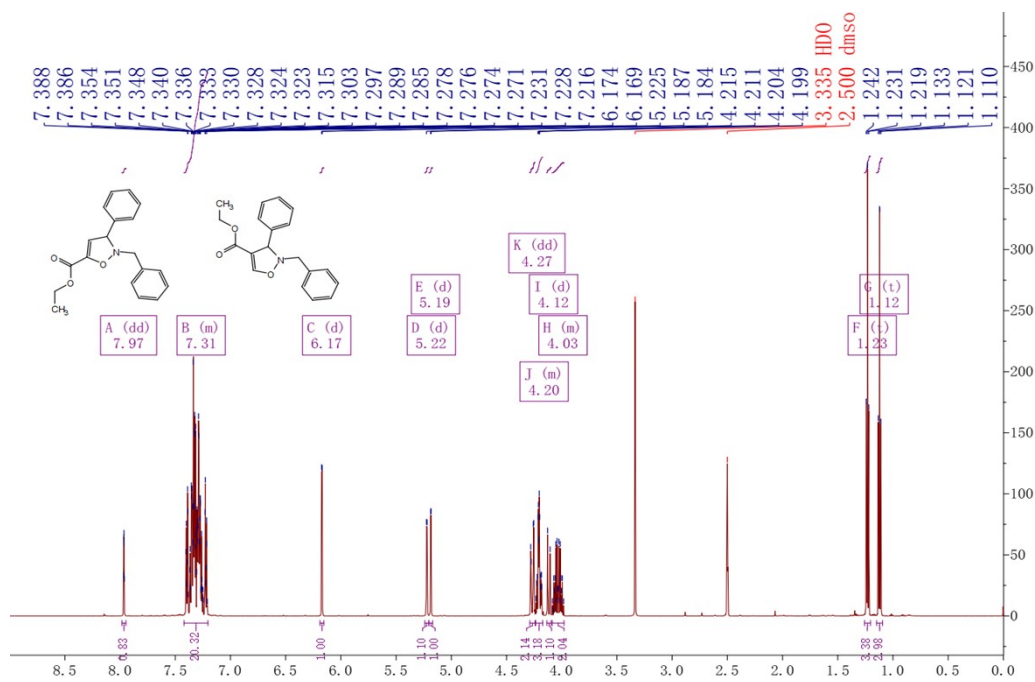

Figure S55 <sup>1</sup>H NMR of **6c** and **6c'**

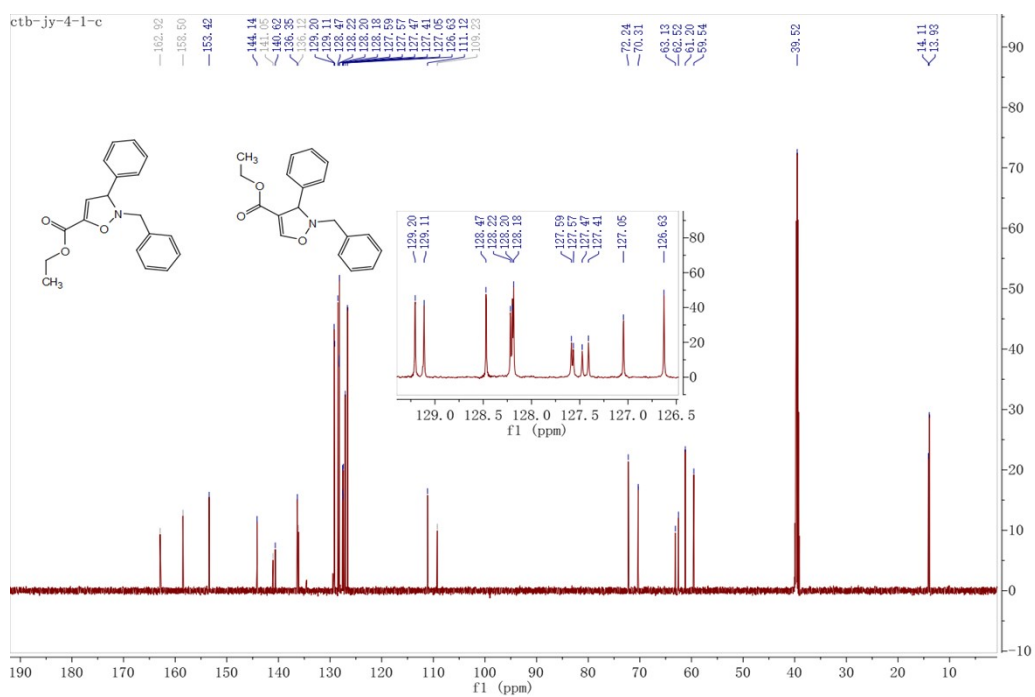

Figure S56 <sup>13</sup>C NMR of **6c** and **6c'**

DCXTQH  
pos\_DCXTQH 586 (3.176)

1: TOF MS ES-  
4.97e6

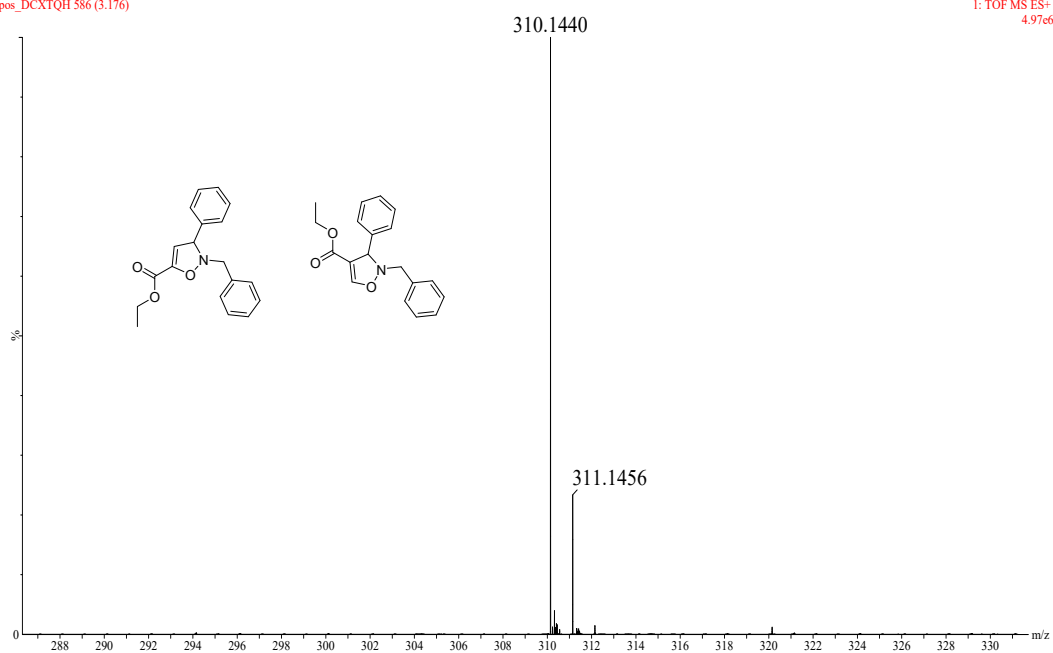

Figure S57 HRMS of 6c and 6c'

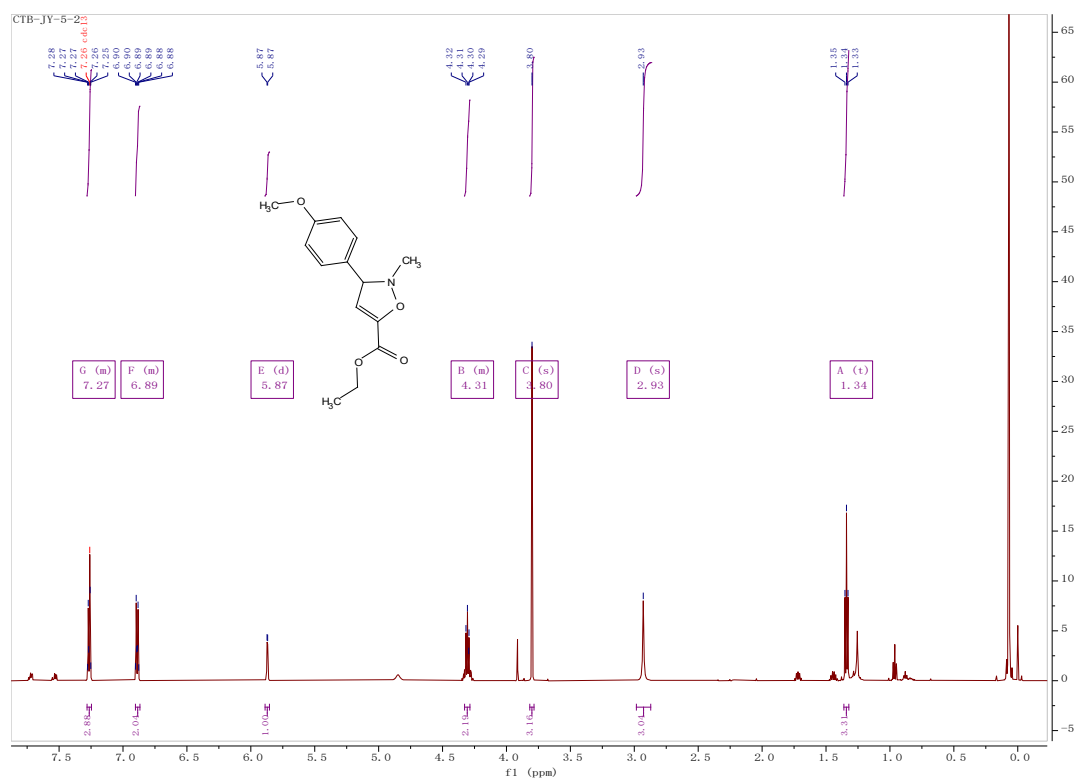

Figure S58 <sup>1</sup>H NMR of 7c

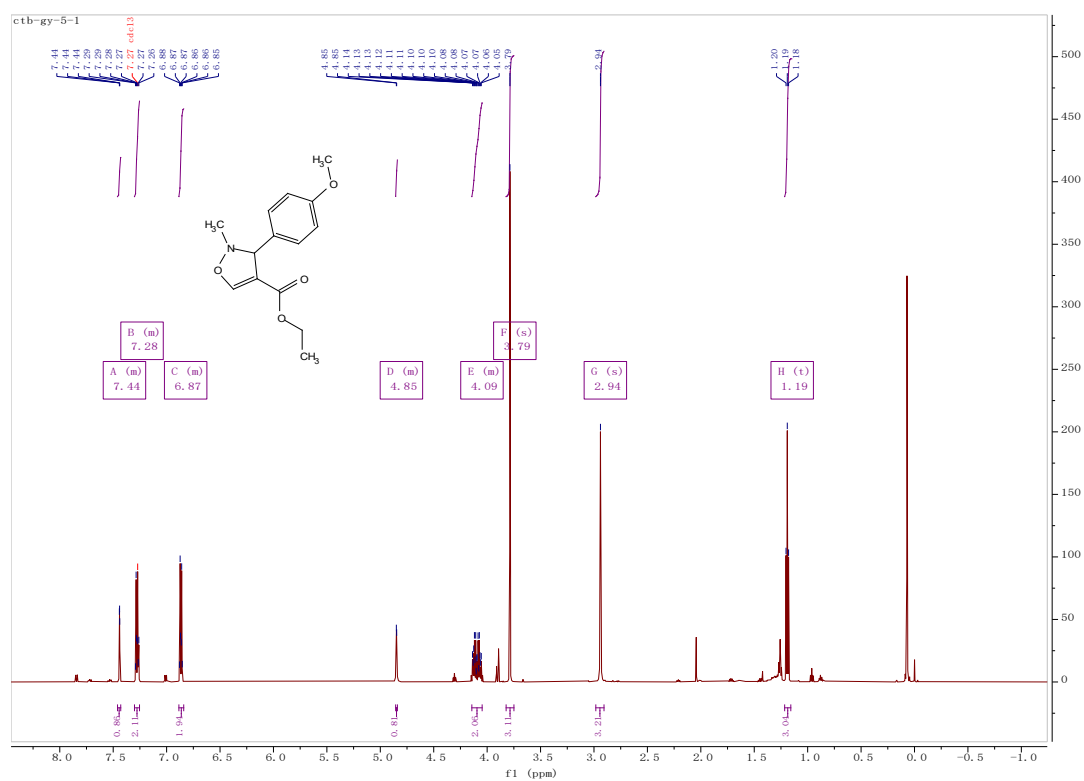

Figure S59 <sup>1</sup>H NMR of 7c'

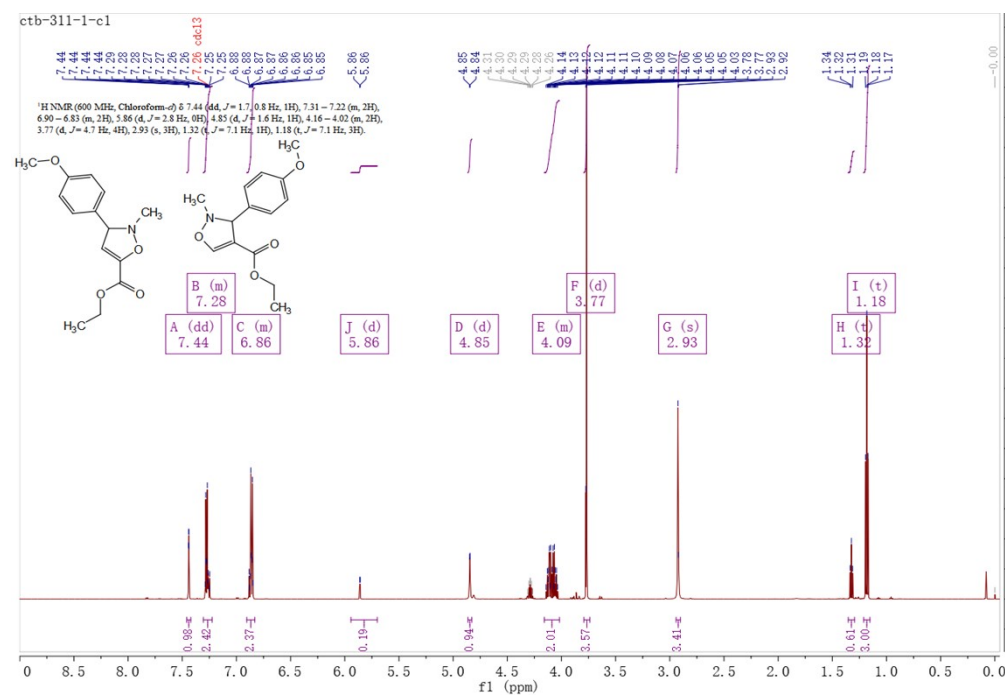

Figure S60 <sup>1</sup>H NMR of 7c and 7c'

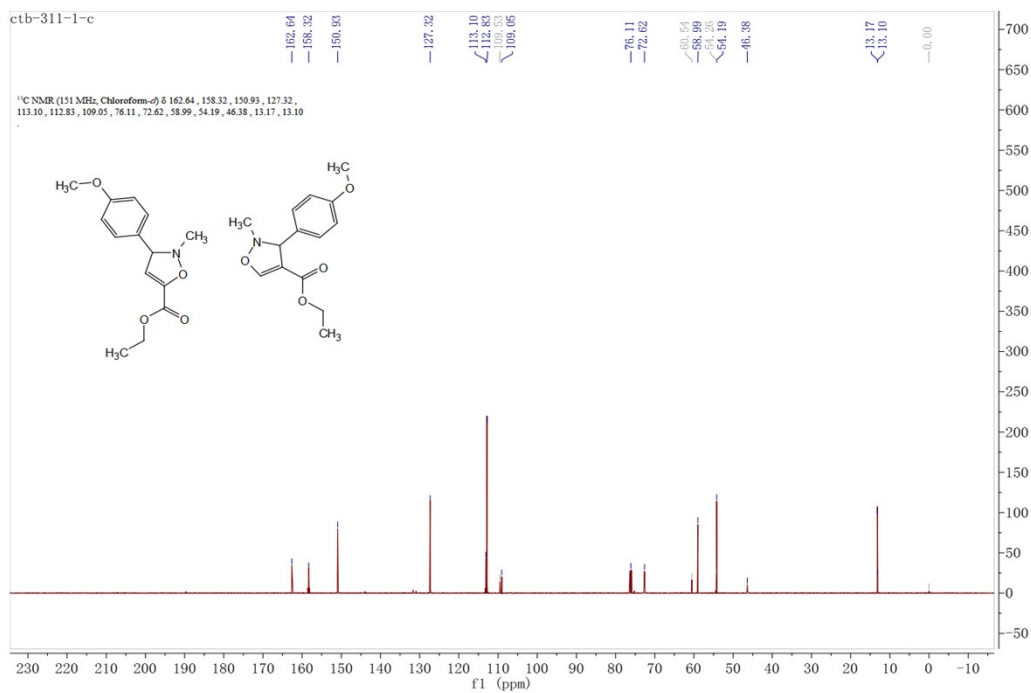

CTB-JY-2-2

pos-CTB-JY-2-2 508 (2.756) Cm (508:509)

1: TOF MS ES+  
7.88e6

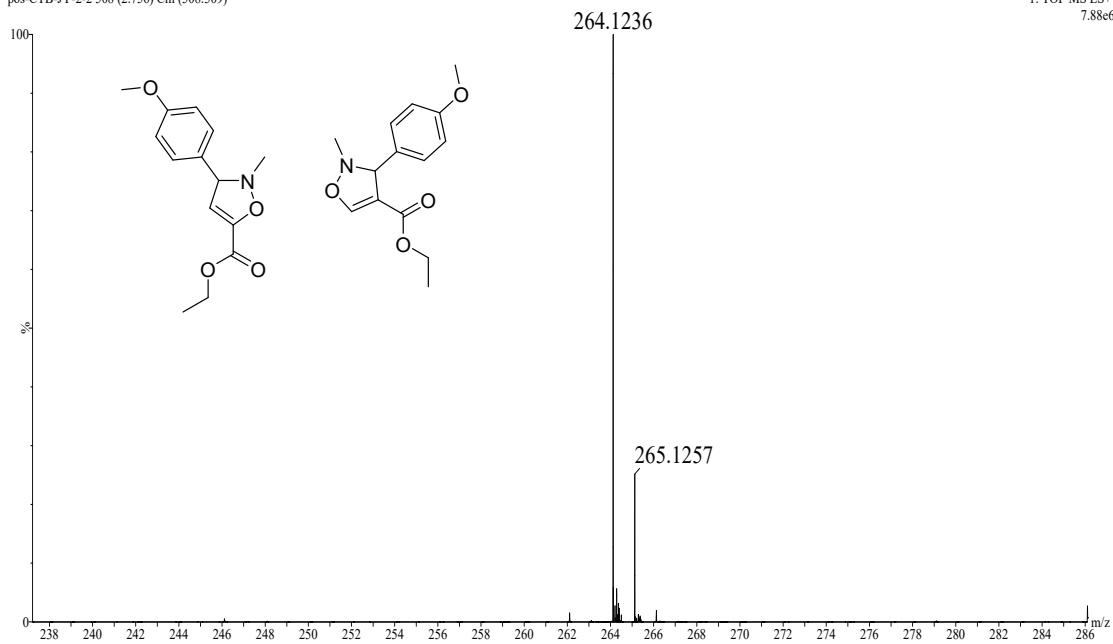

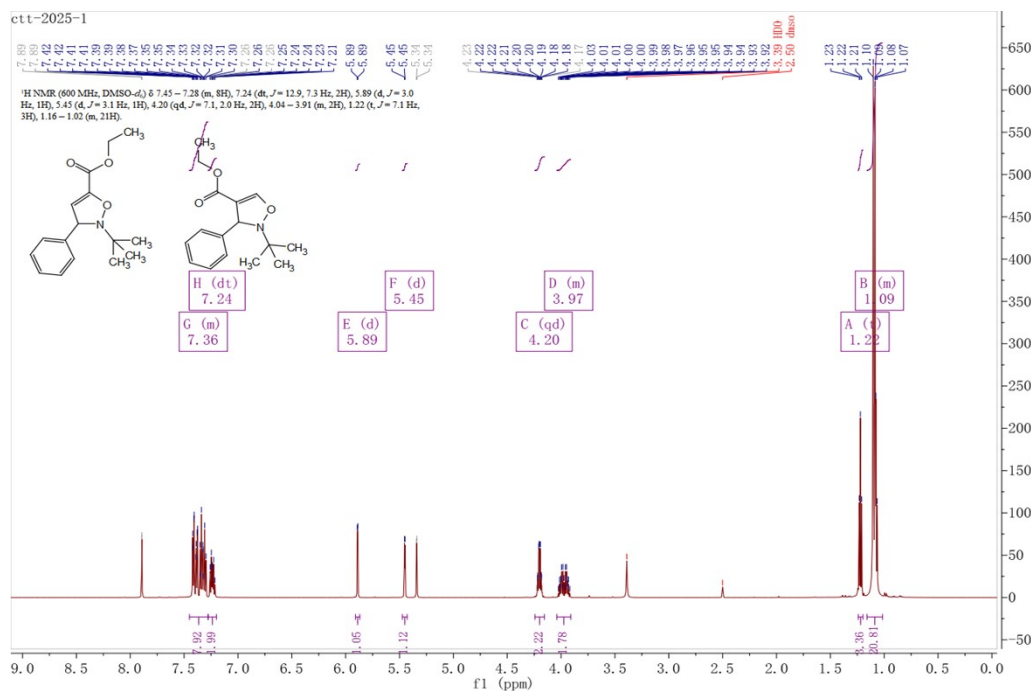

Figure S63 <sup>1</sup>H NMR of **8c** and **8c'**

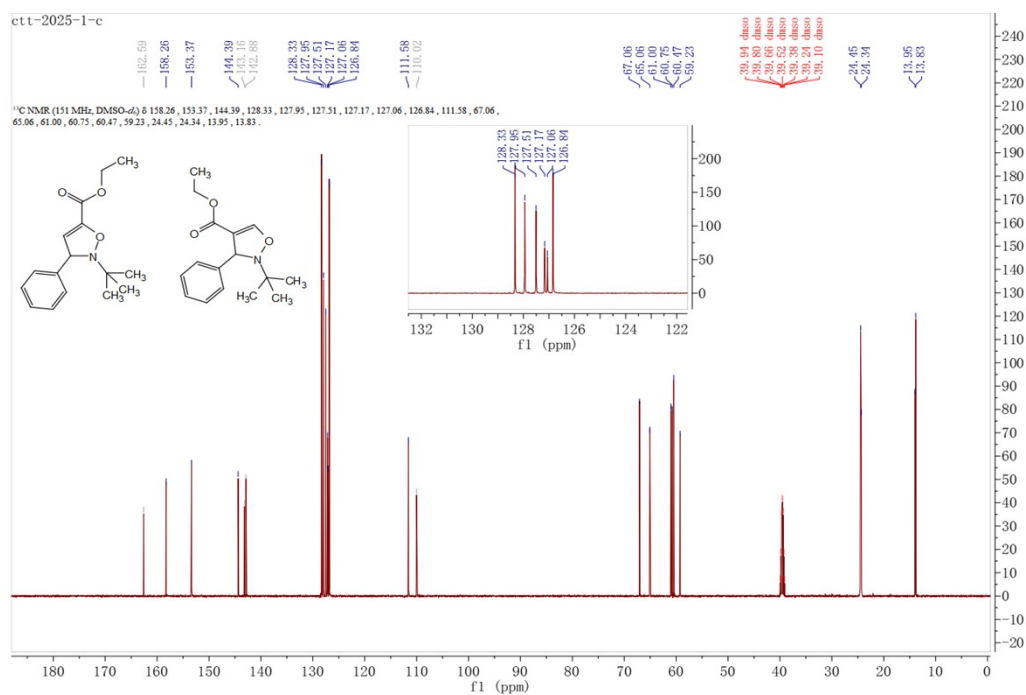

Figure S64 <sup>13</sup>C NMR of **8c** and **8c'**

shuQH

pos\_shuQH 169 (3.300) AM (Cen.4, 80.00, Ar.10000.0,0.00,0.00)

I: TOF MS ES+  
1.29e7

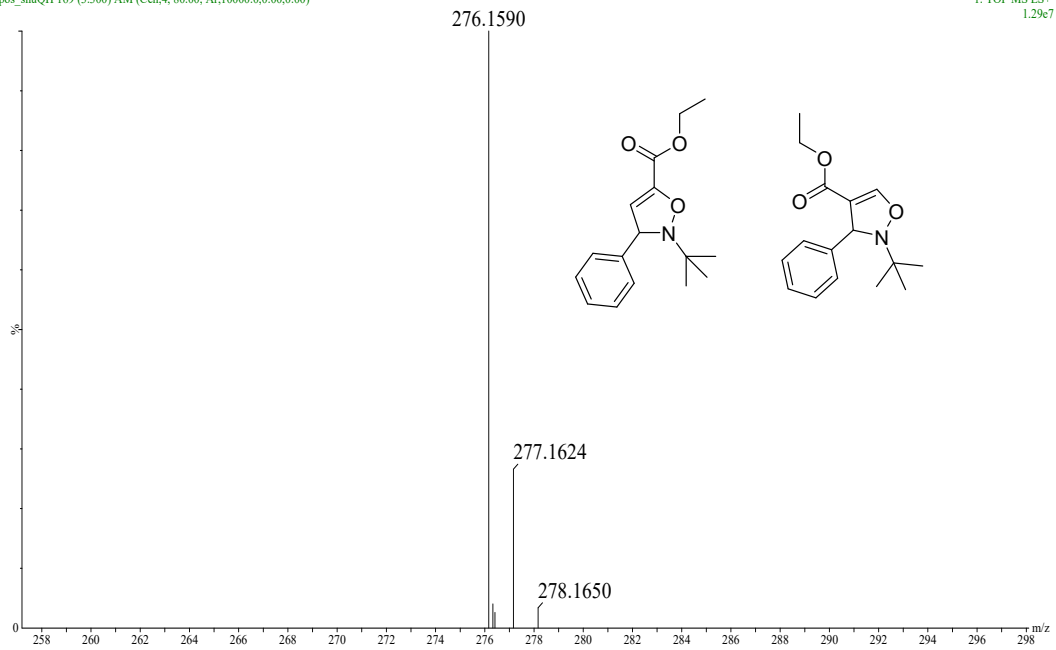

Figure S65 HRMS of 8c and 8c'

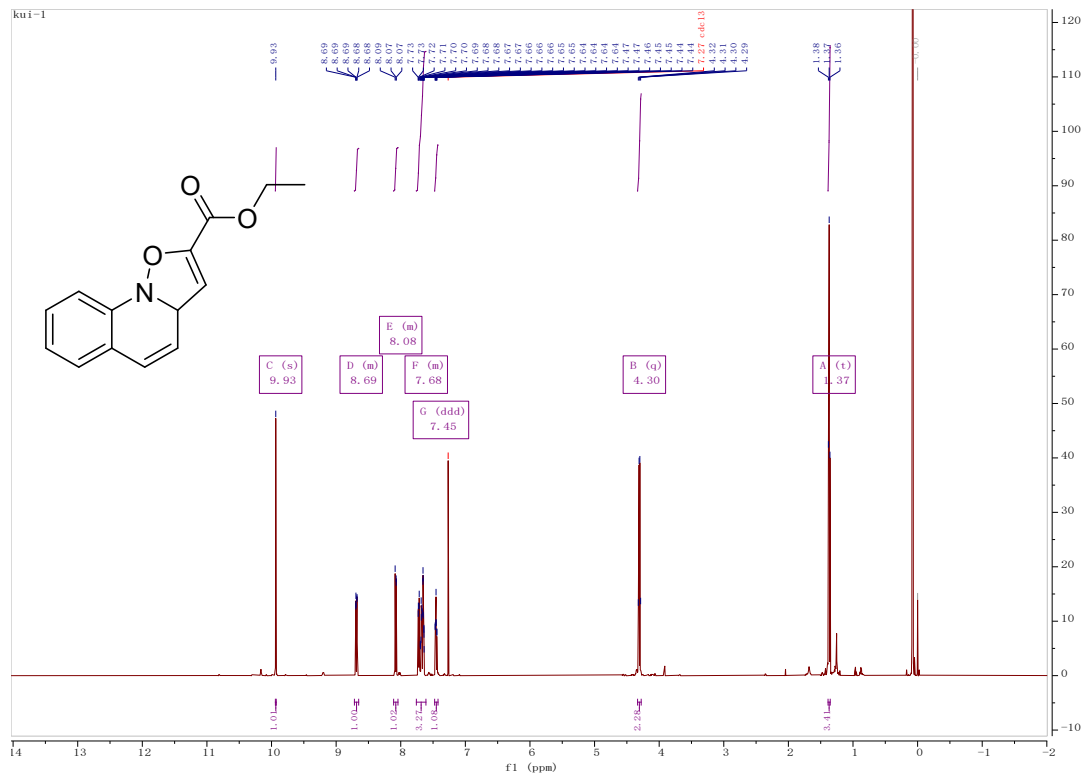

Figure S66 <sup>1</sup>H NMR of 9c

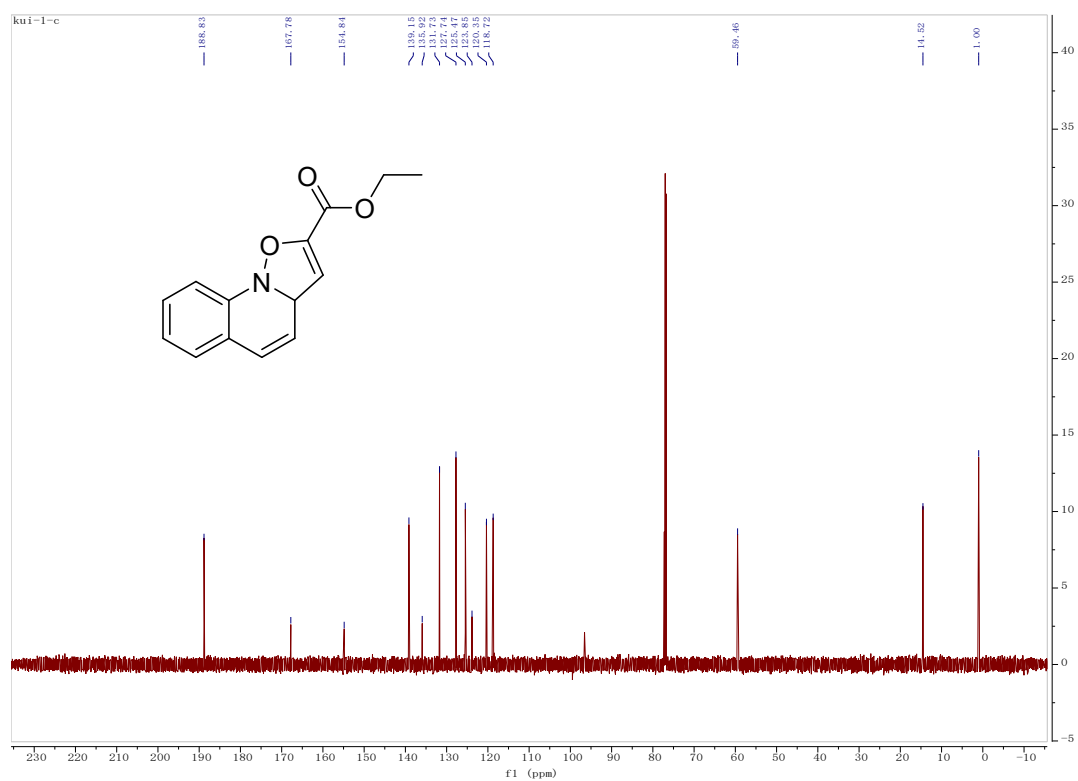

Figure S67  $^{13}\text{C}$  NMR of **9c**

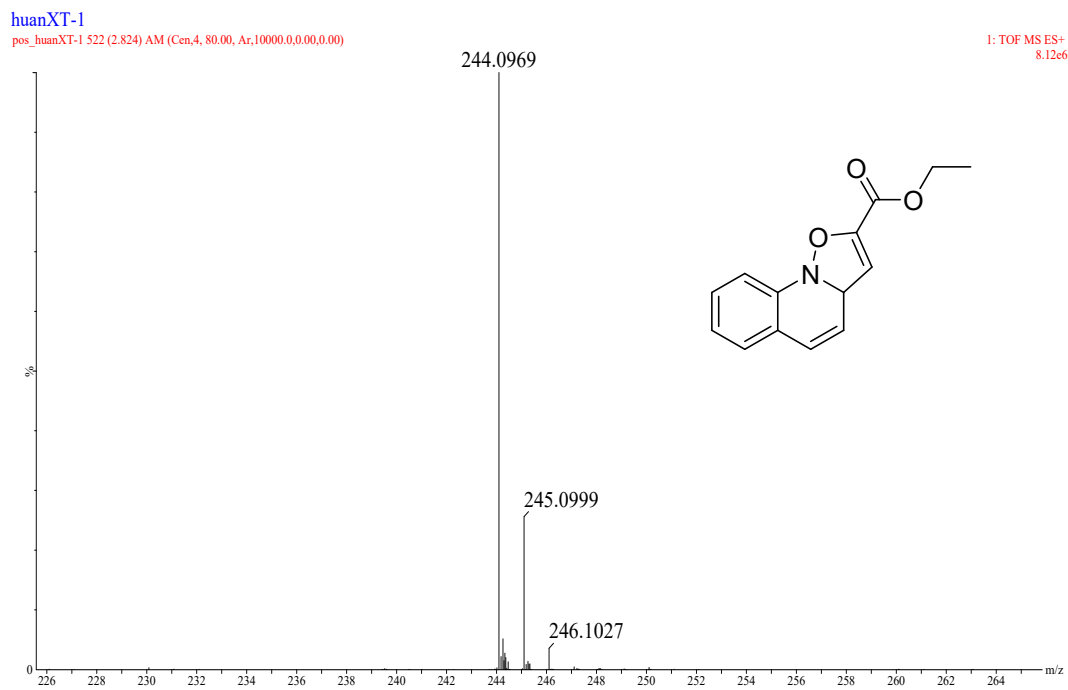

Figure S68 HRMS of **9c**

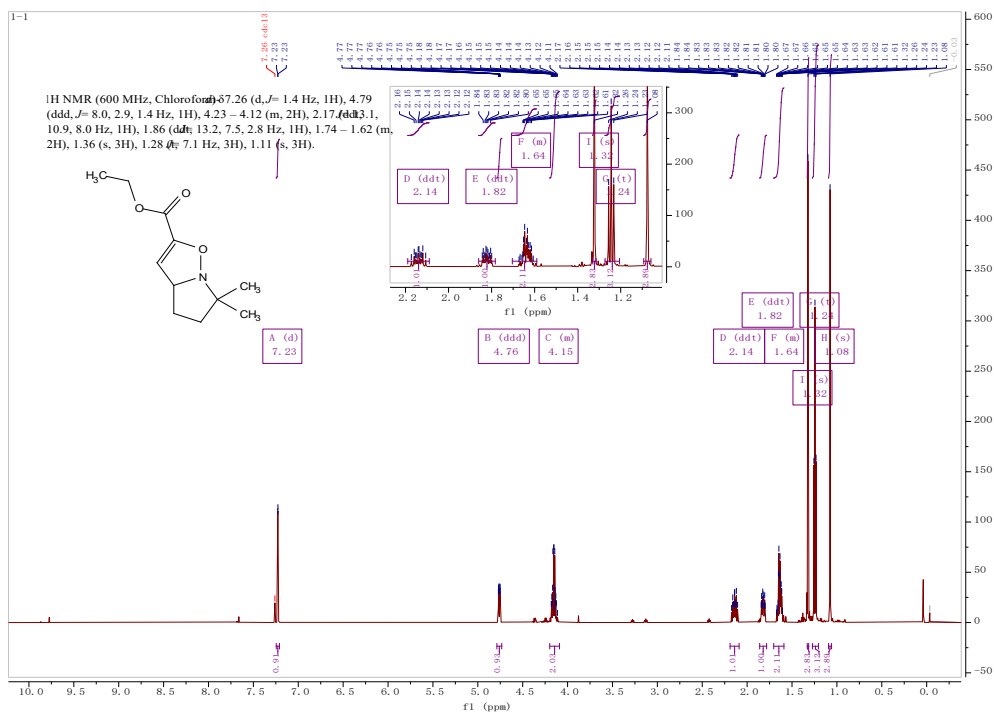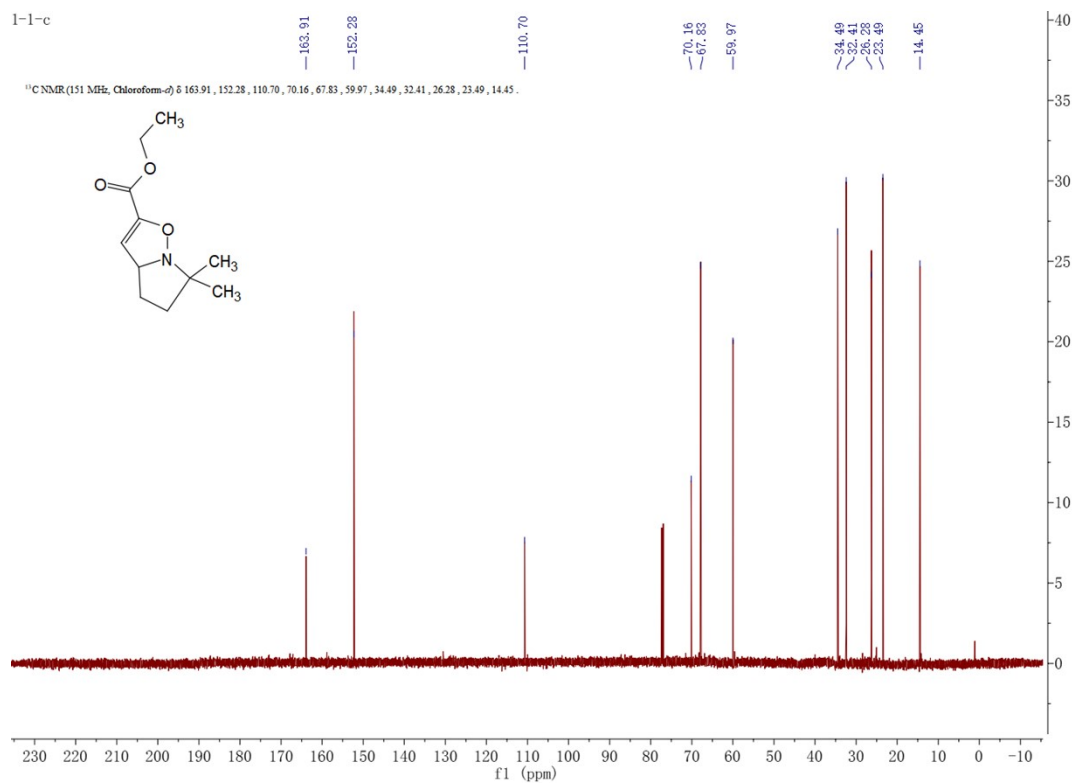

biLuoLinQH

pos\_biLuoLinQH 122 (2.456) AM (Cen,4, 80.00, Ar,10000.0,0.00,0.00); Cm (122)

I: TOF MS ES+  
2.03e6

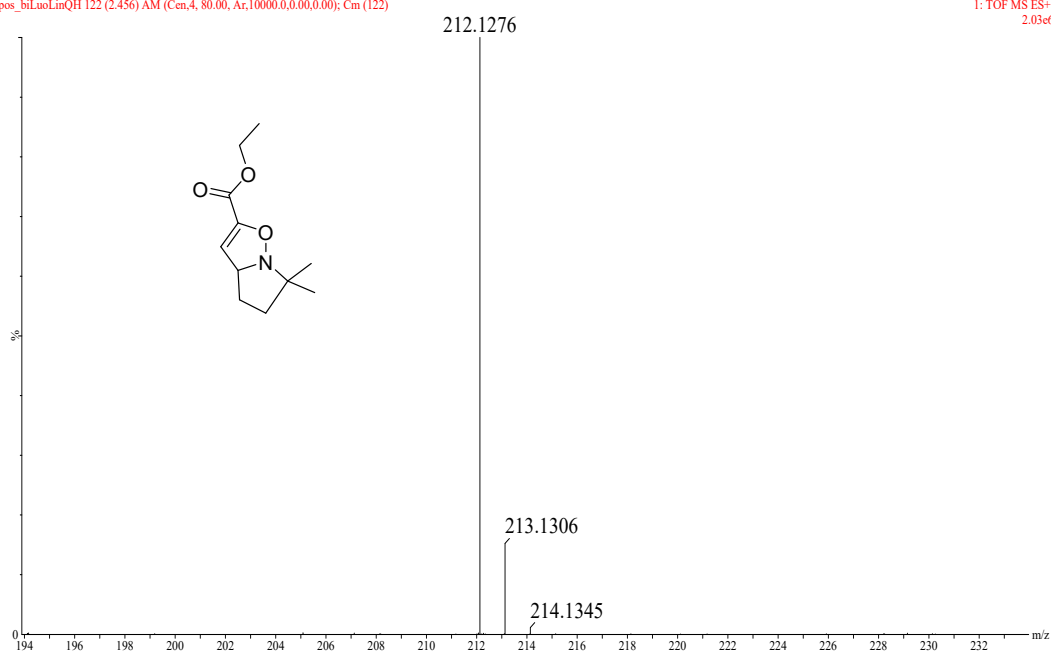

Figure S71 HRMS of 10c

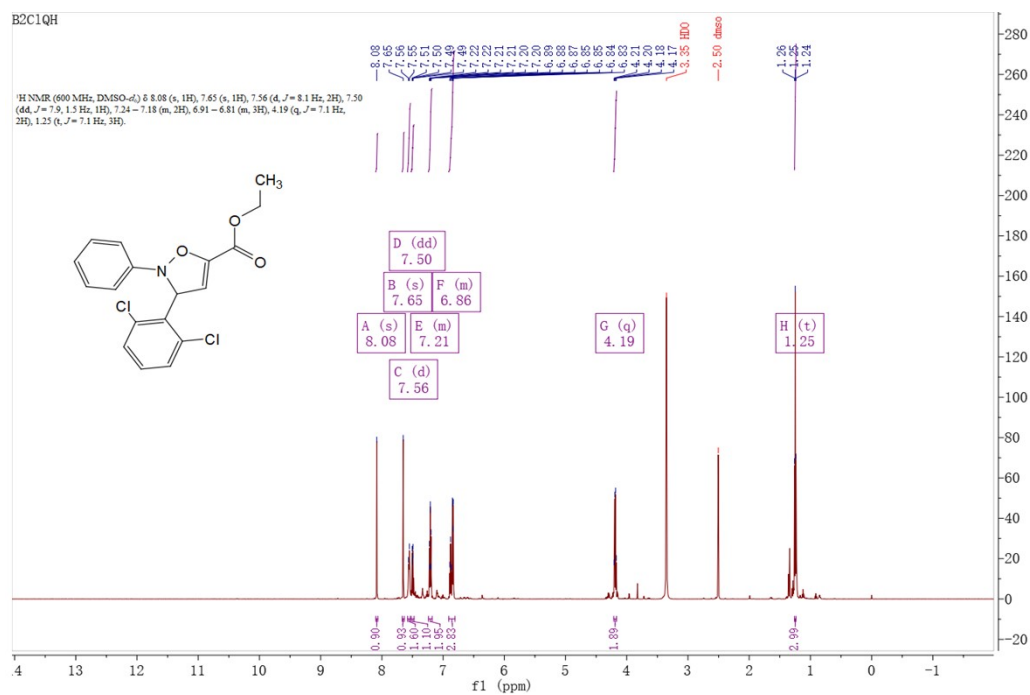

Figure S72 <sup>1</sup>H NMR of 11c

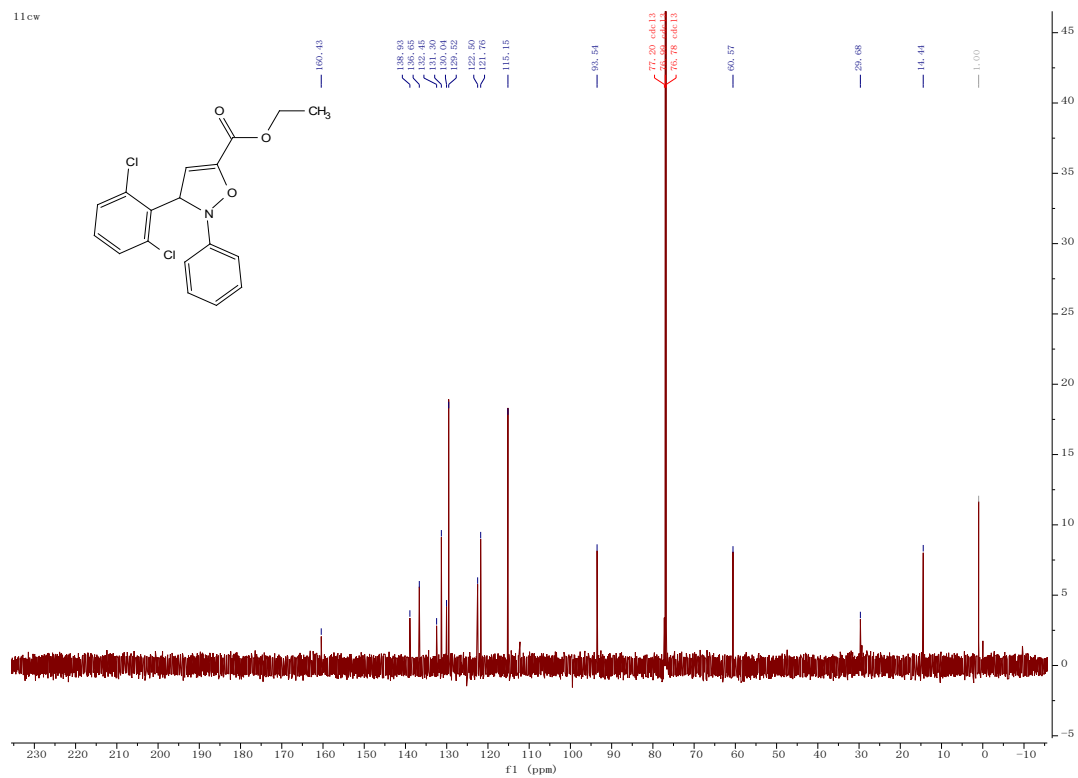

Figure S 73  $^{13}\text{C}$  NMR of 11c

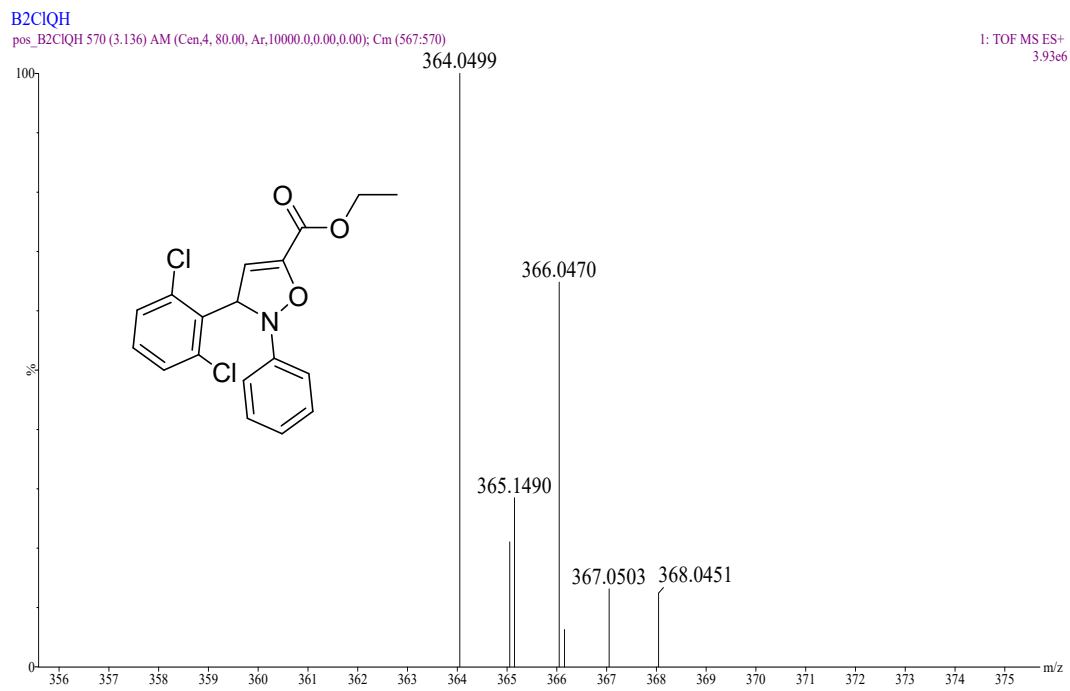

Figure S74 HRMS of 11c

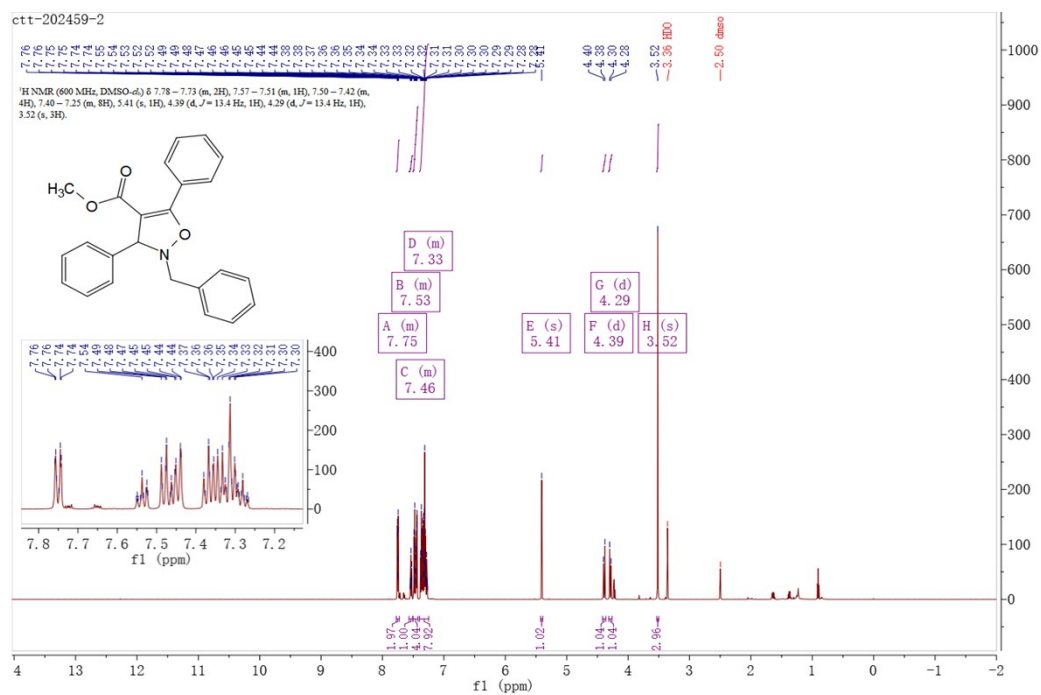

Figure S75 <sup>1</sup>H NMR of **12c**

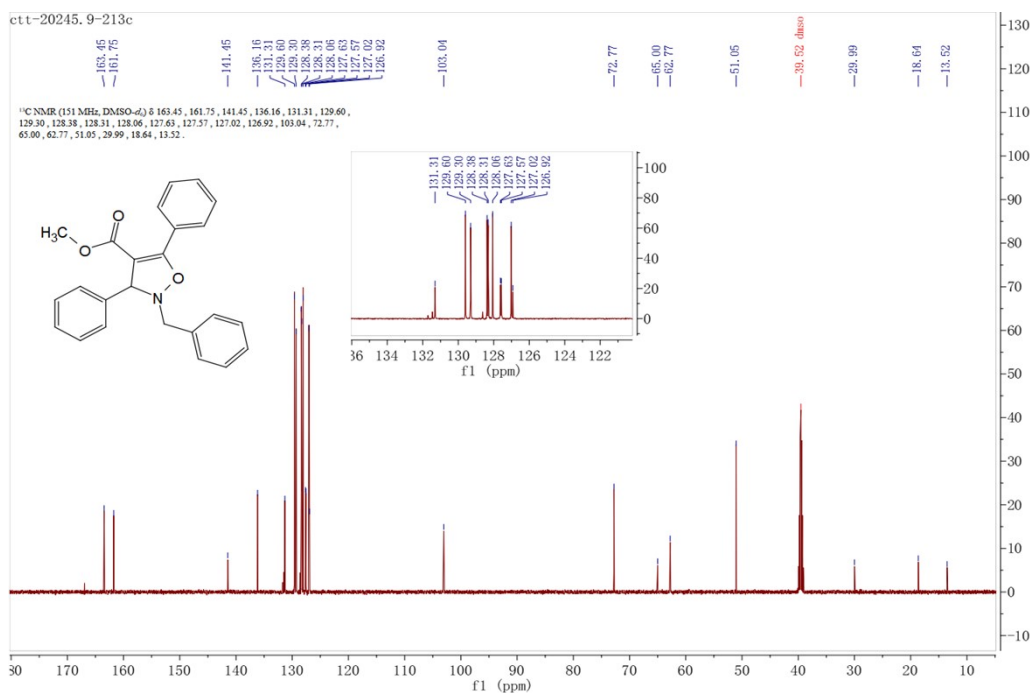

Figure S76 <sup>13</sup>C NMR of **12c**

DCXTBQ-2  
neg\_DCXTBQ-2 603 (3.577)

1: TOF MS ES-  
3.94e6

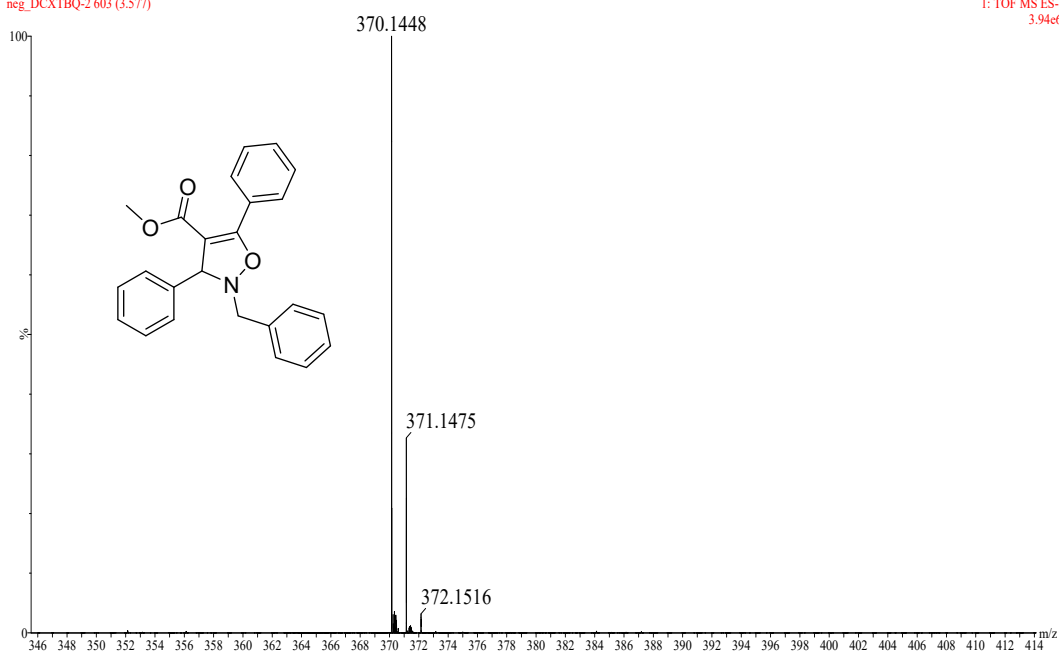

Figure S77 HRMS of 12c

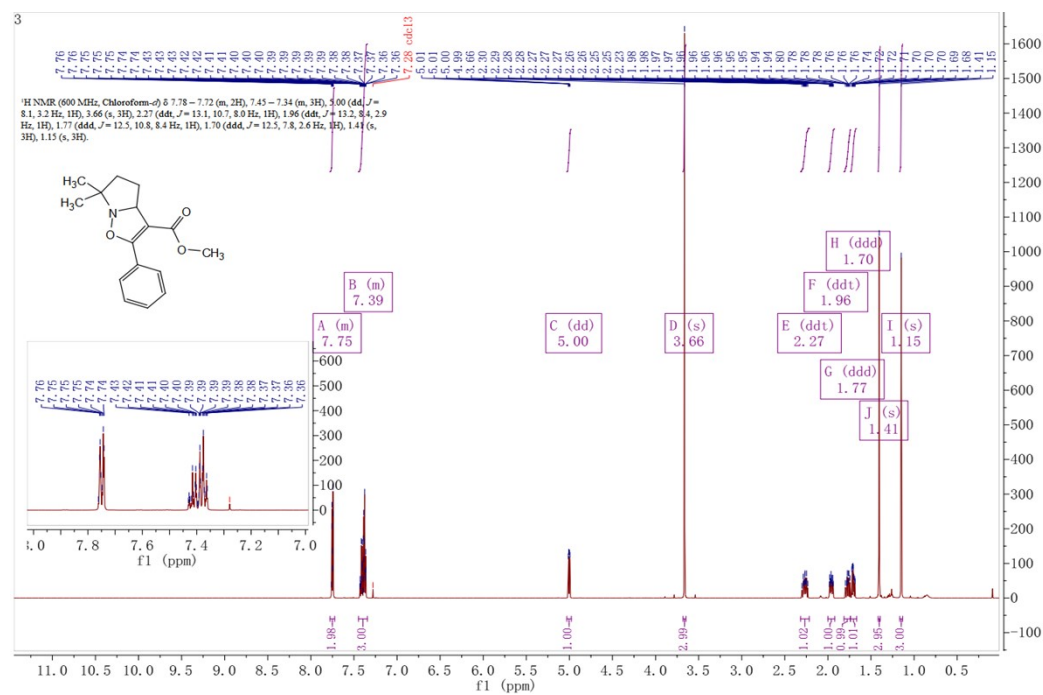

Figure S78 <sup>1</sup>H NMR of 13c

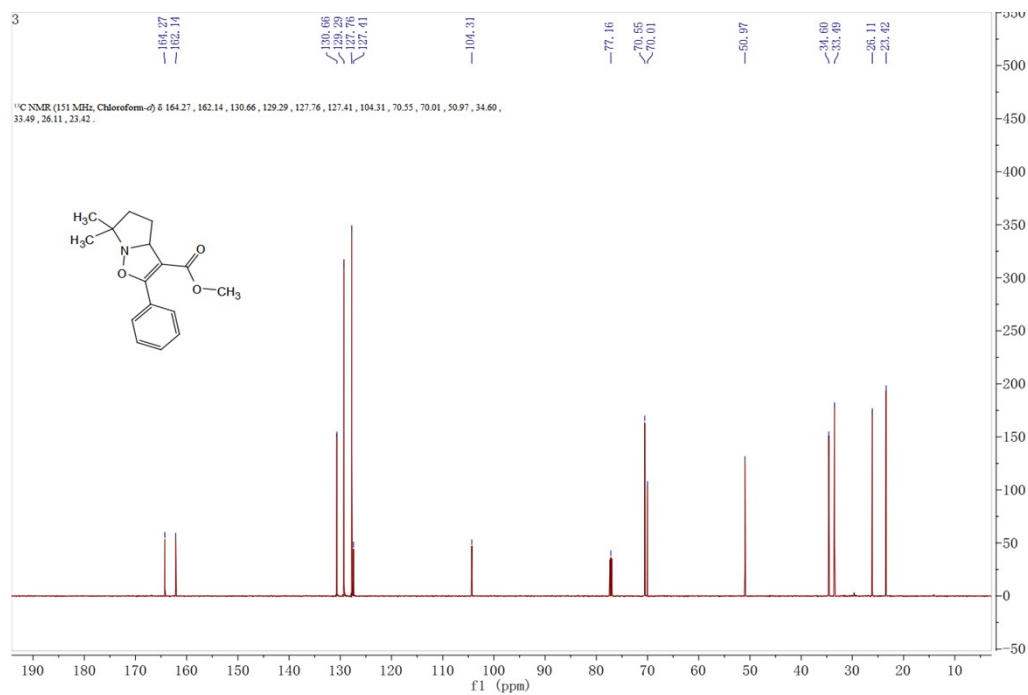

Figure S79 <sup>13</sup>C NMR of **13c**

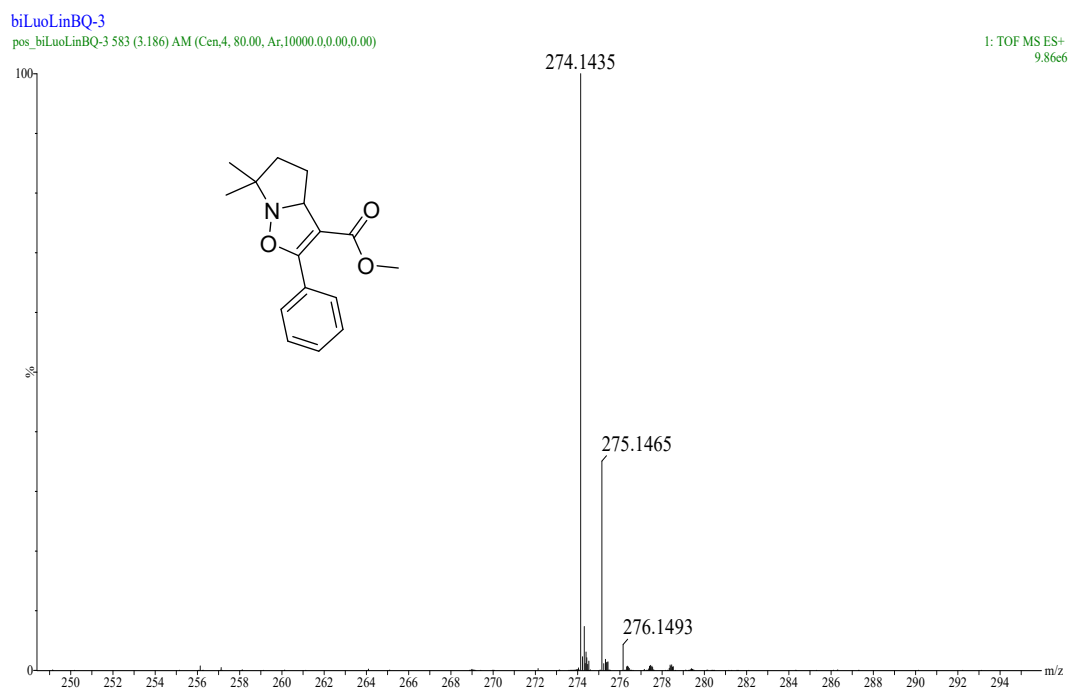

Figure S80 HRMS of **13c**

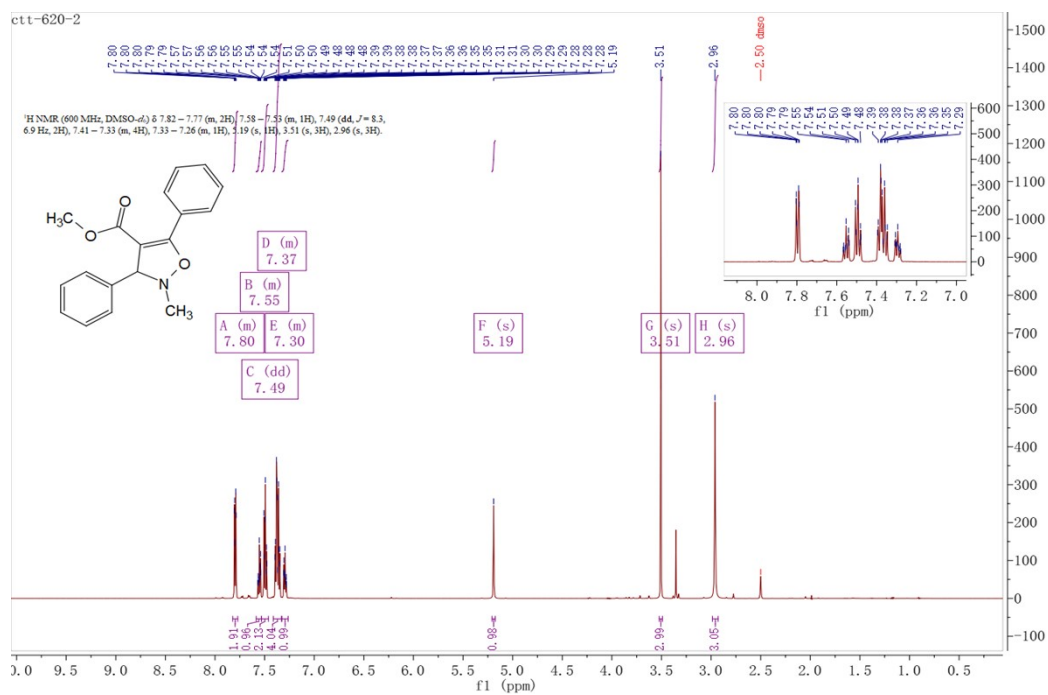

Figure S81 <sup>1</sup>H NMR of **14c**

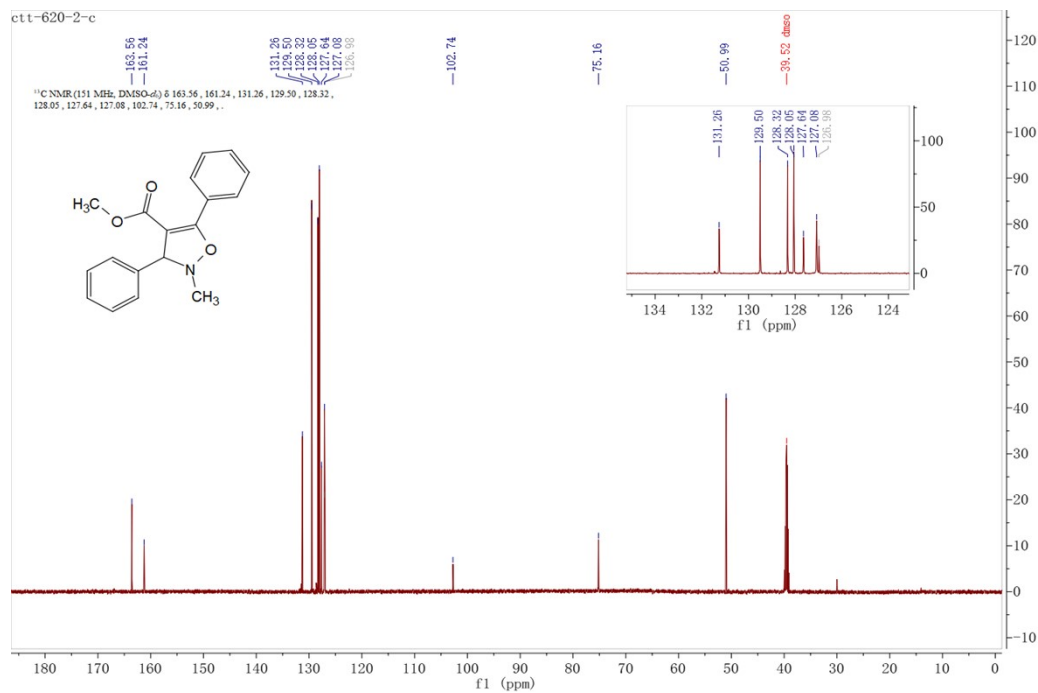

Figure S82 <sup>13</sup>C NMR of **14c**

CTT-620-2

pos\_CTT-620-2 589 (3.237) AM (Cen,4, 80.00, Ar,10000.0,0.00,0.00)

1: TOF MS ES+  
3.72e6

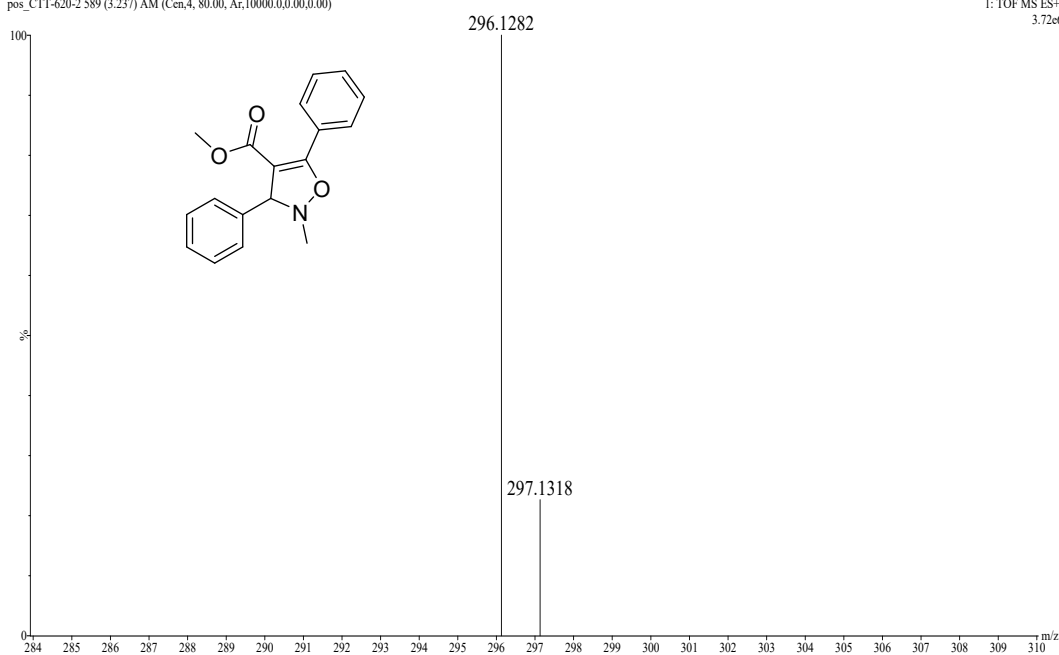

Figure S83 HRMS of 14c

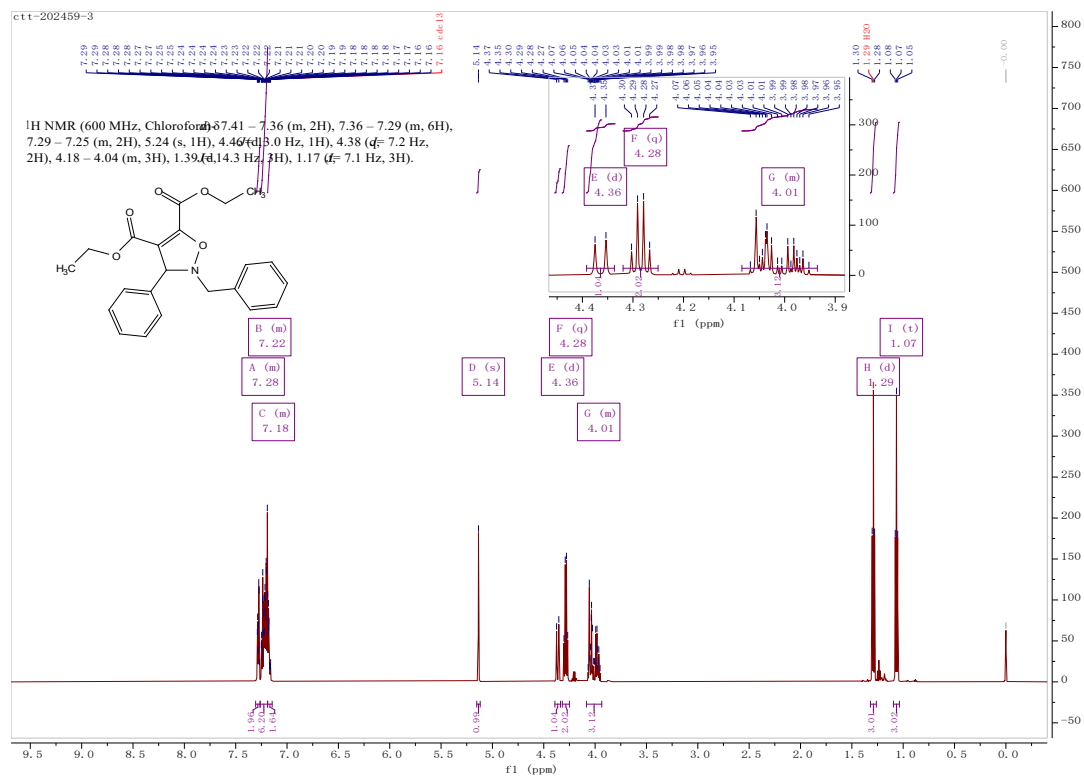

Figure S84 <sup>1</sup>H NMR of 15c

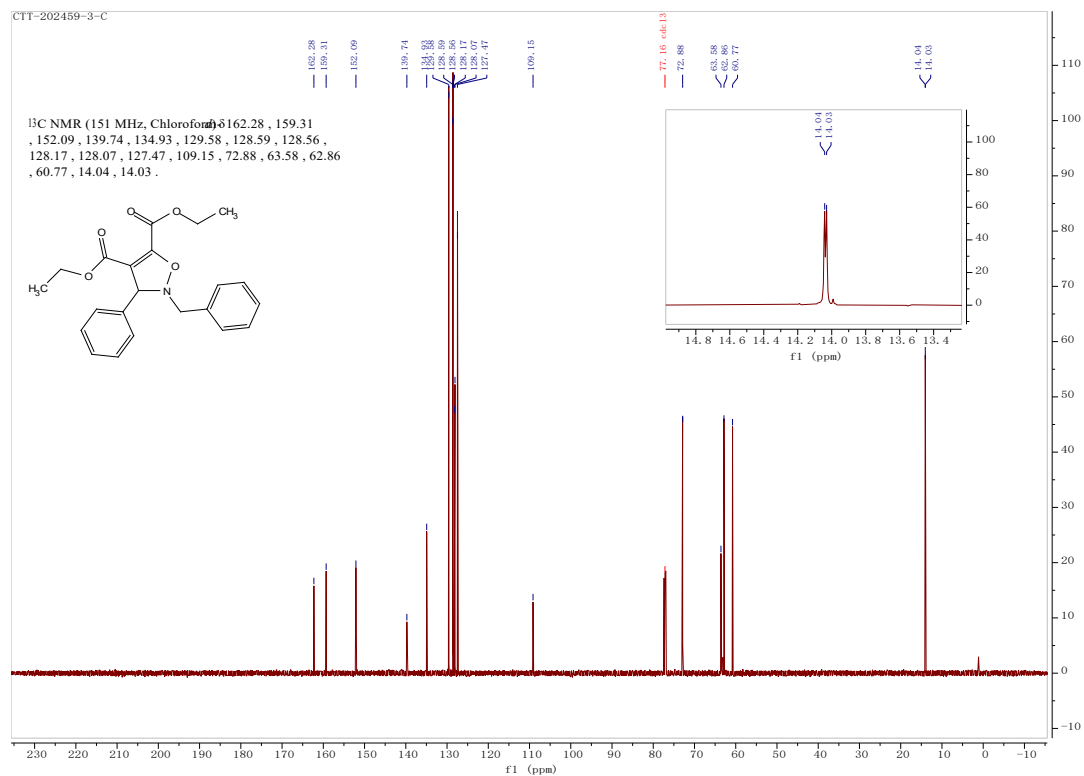

Figure S85 <sup>13</sup>C NMR of 15c

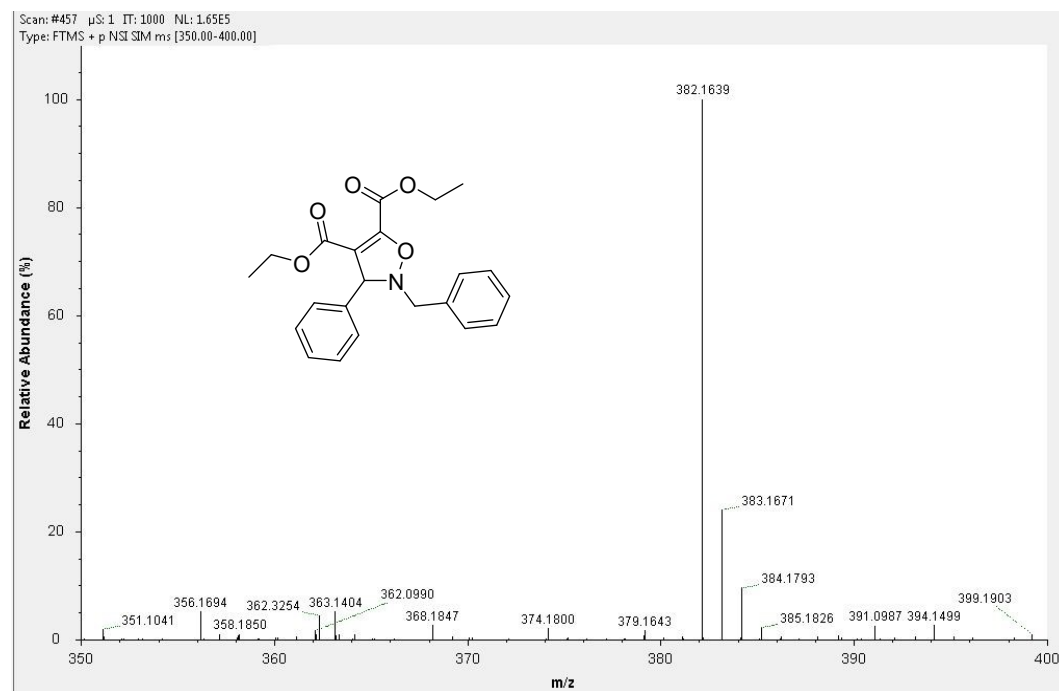

Figure S86 HRMS of 15c

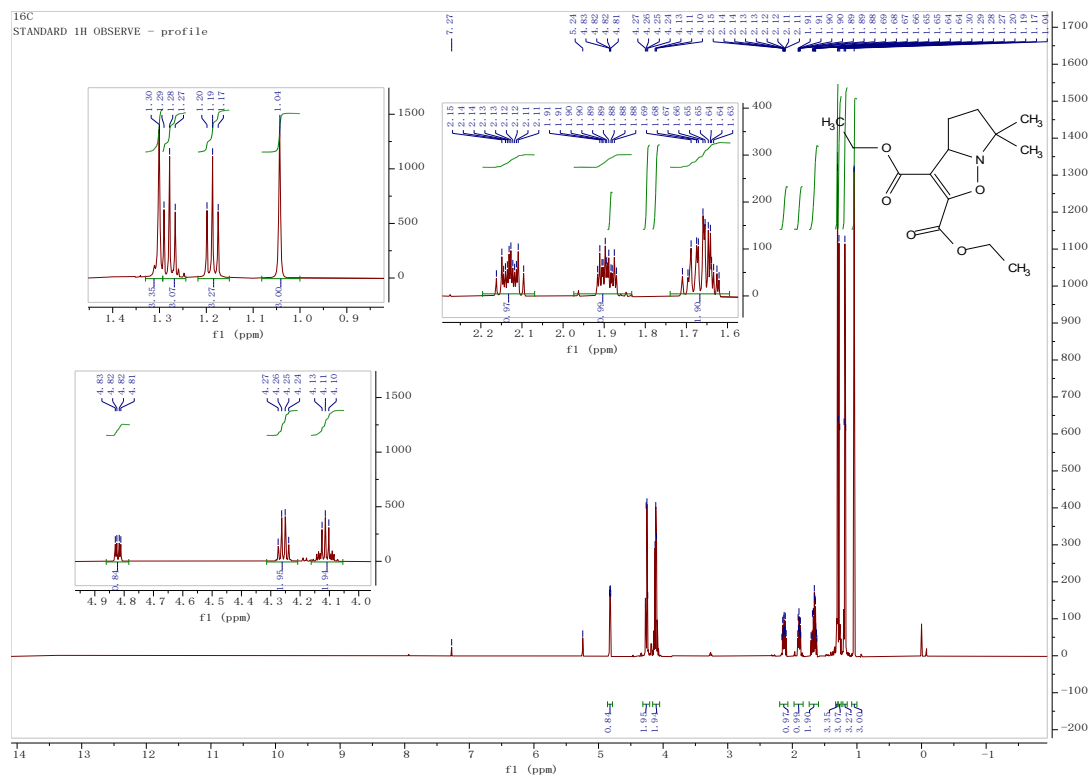

Figure S87 <sup>1</sup>H NMR of 16c

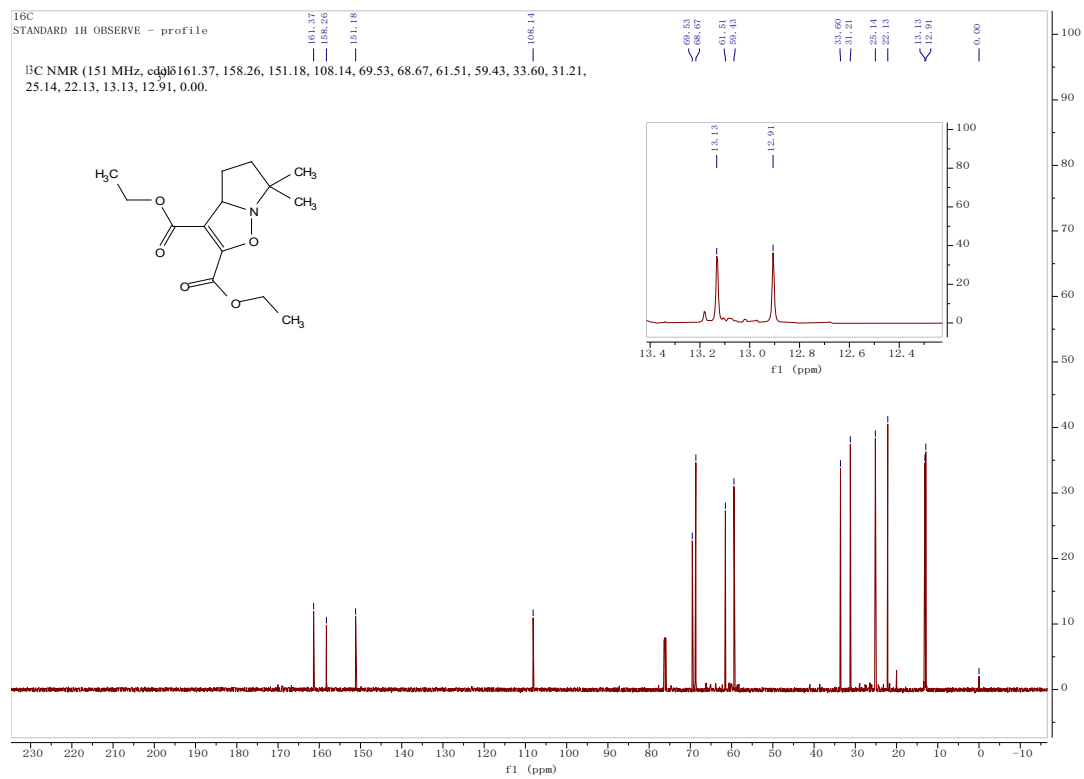

Figure S88 <sup>13</sup>C NMR of 16c

biLuoLin-2-1  
pos\_biLuoLin-2-1 414 (2.271)

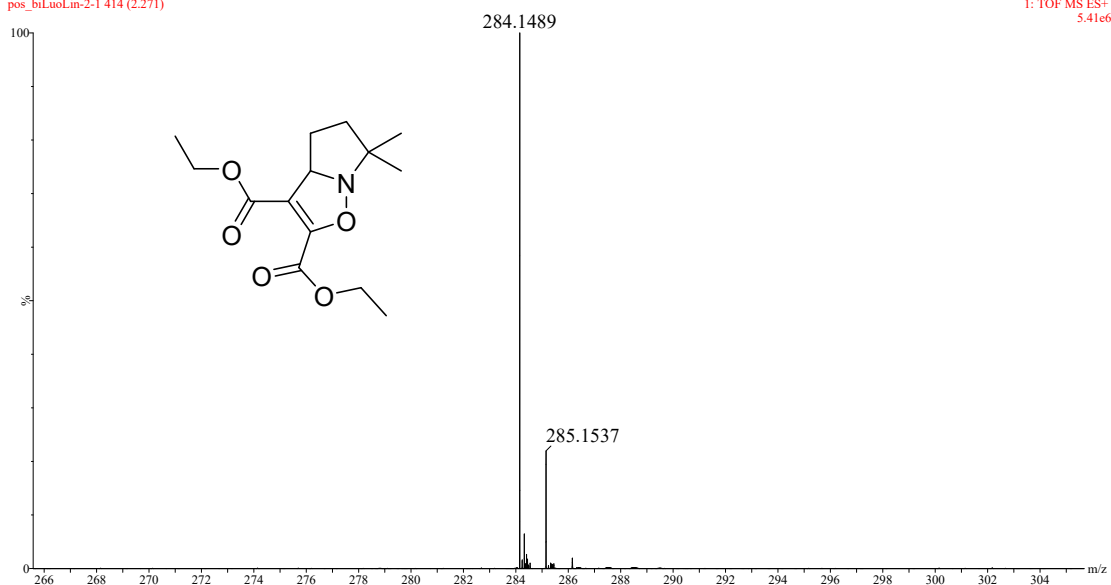

Figure S89 HRMS of 16c

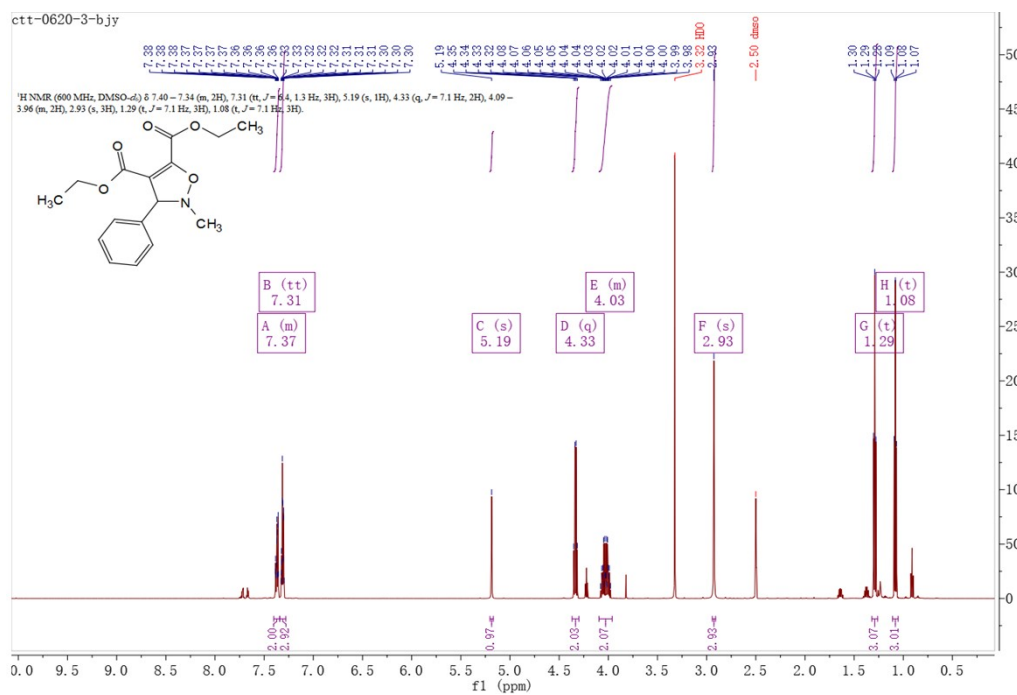

Figure S90 <sup>1</sup>H NMR of 17c

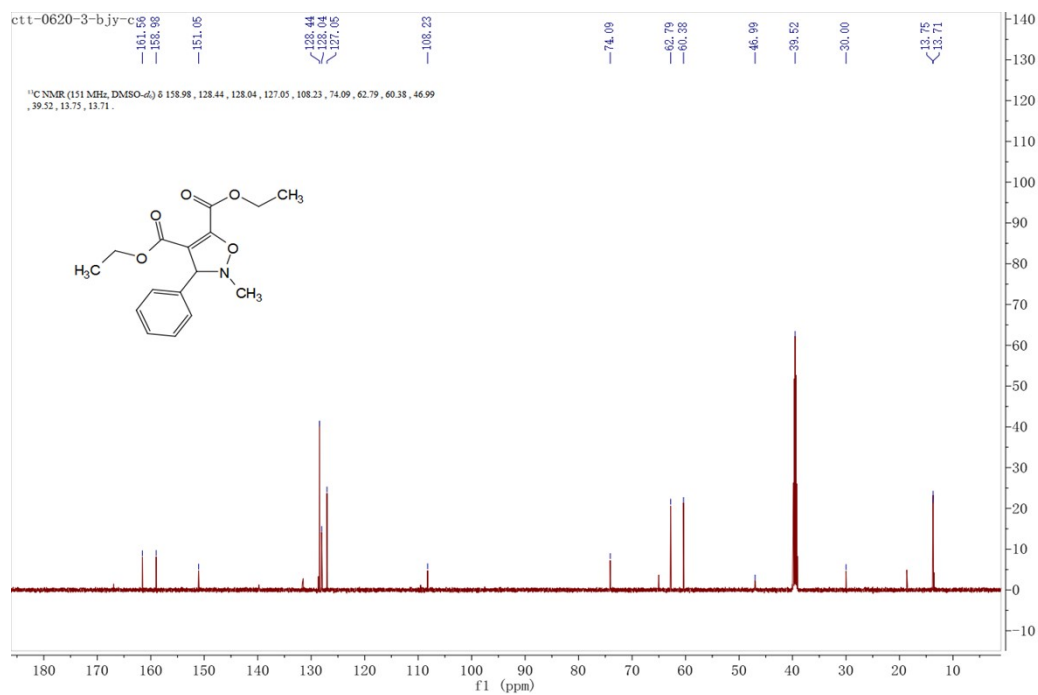

Figure S91 <sup>13</sup>C NMR of **17c**

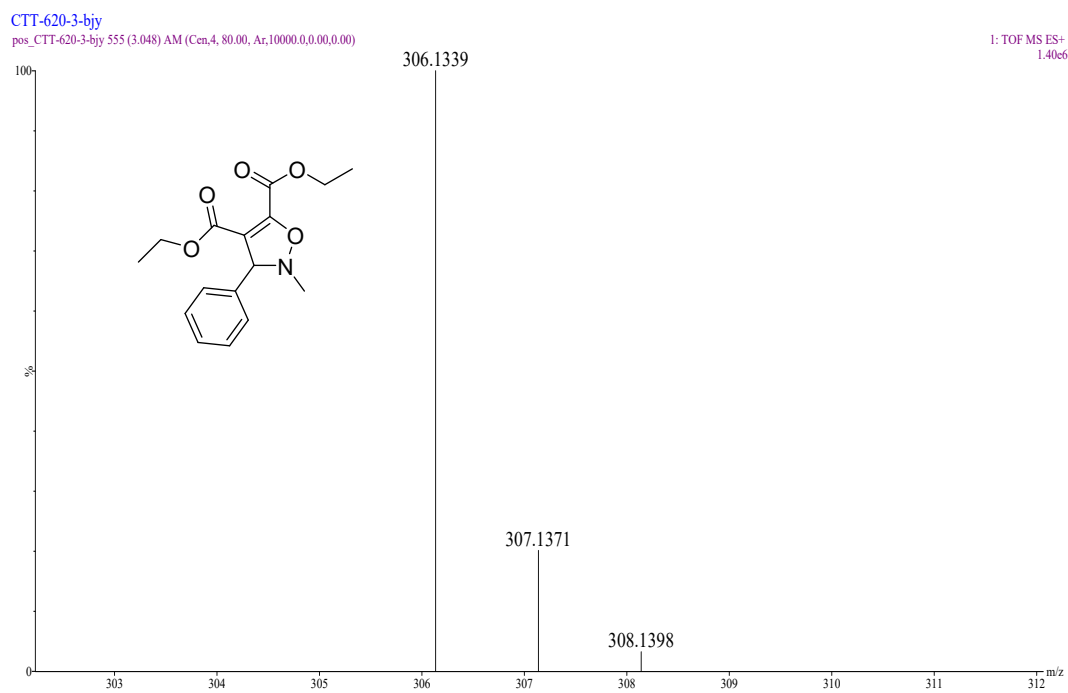

Figure S92 HRMS of **17c**

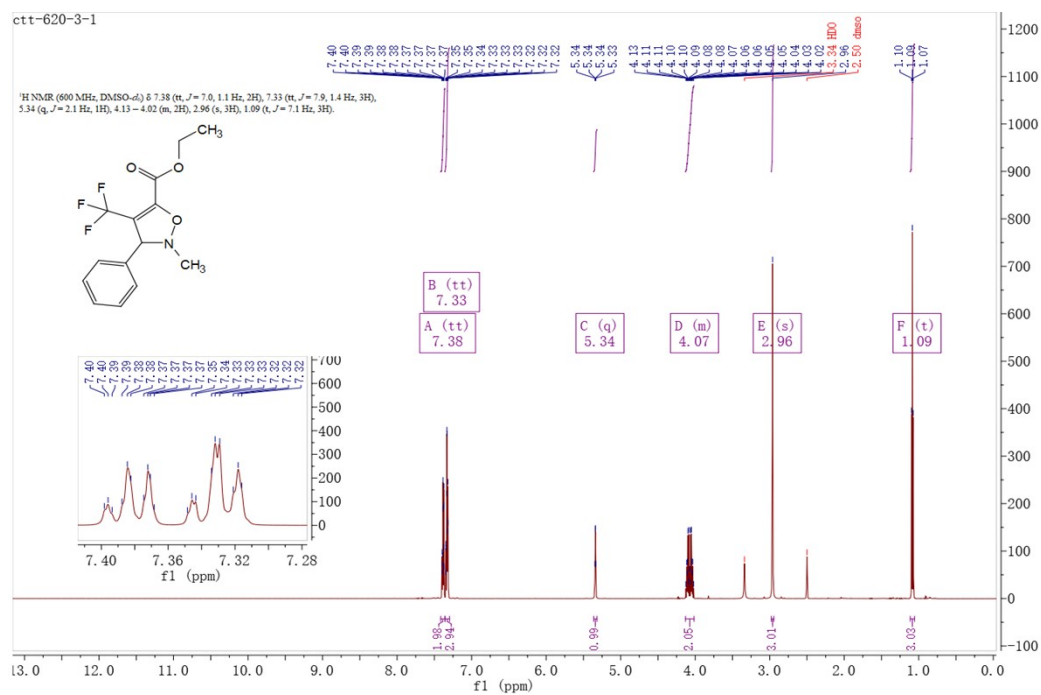

Figure S93 <sup>1</sup>H NMR of **18c**

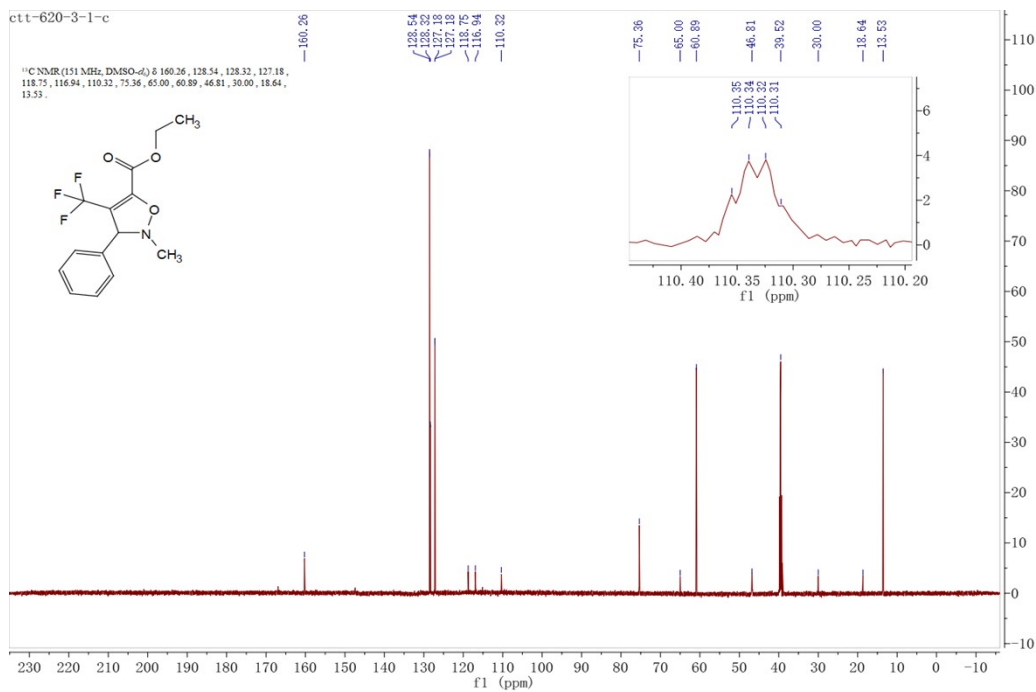

Figure S94 <sup>13</sup>C NMR of **18c**

CTT-620-3-1

pos\_CTT-620-3-1 599 (3.289) AM (Cen.4, 80.00, Ar.10000.0.0.00.0.00)

1: TOF MS ES+  
7.80e6

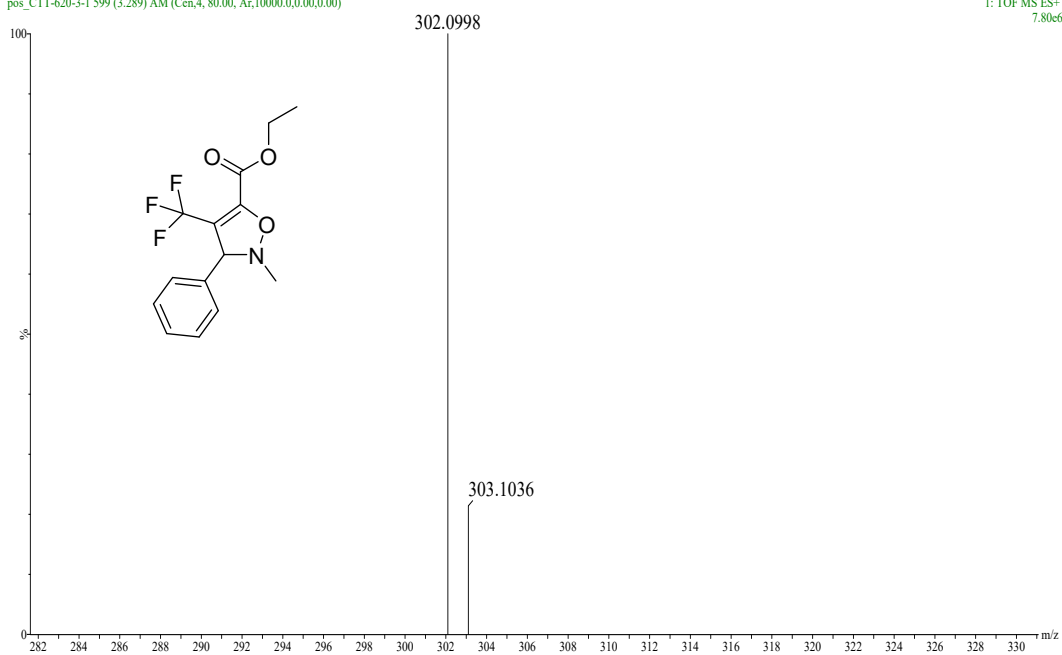

Figure S95 HRMS of **18c**

TEMPO-ctt

pos\_TEMPO-ctt 479 (2.908) Cm (476.485-(420.471+512.572))

1: TOF MS ES+  
2.55e6

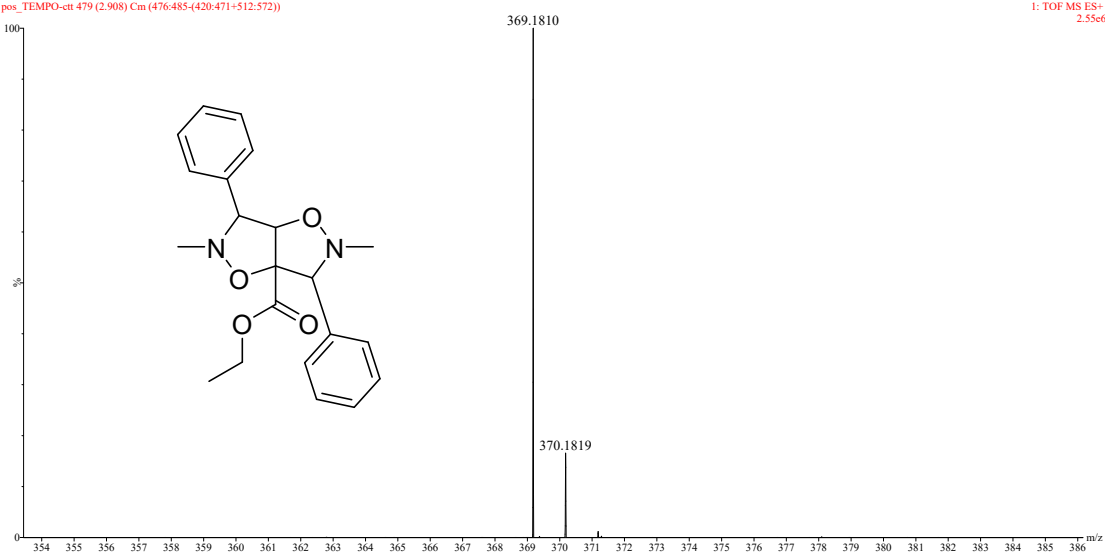

Figure S96 HRMS of **1f**
